# Supplementary material for: Global transcriptional analysis of Escherichia coli expressing IrrE, a regulator from Deinococcus radiodurans , in response to NaCl shock
Source: Royal Society of Chemistry journal article supplement (doi:10.1039/c5mb00080g), 2015-02-10
Supplement: c5mb00080g1.xlsx [file c5mb00080g1.xlsx]

## Sheet: 0min-up
Blattner number	Gene name	Functional description	Log2 ratio
Response to stress
b0812	dps	DNA starvation/stationary phase protection protein Dps	1.01
b1004	wrbA	TrpR binding protein WrbA	1.76
b1304	pspA	phage shock protein PspA	1.82
b1482	osmC	stress-inducible membrane protein	1.83
b1500	b1500	small membrane protein, connecting EvgS/EvgA and PhoQ/PhoP	1.46
b1732	katE	hydroperoxidase HPII(III) (catalase)	1.2
b1896	otsA	trehalose-6-phosphate synthase	1.74
b1897	otsB	trehalose-6-phosphate phosphatase	2.5
b1967	yedU	chaperone protein HchA	1.87
b2851	ygeG	predicted chaperone	1.55
b3494	yhiO	universal stress protein UspB	1.81
b4045	yjbJ	putative stress-response protein	1.57
b4411	ecnB	entericidin B membrane lipoprotein	1.87
Regulation
b0435	bolA	transcriptional regulator BolA	1.88
b0564	appY	DLP12 prophage; DNA-binding transcriptional activator	2.01
b0989	cspH	cold shock-like protein cspH	1
b0999	yccD	modulator of CbpA co-chaperone	1.87
b1145	ymfK	e14 prophage; repressor protein phage e14	9.11
b1147	ymfL	e14 prophage; predicted DNA-binding transcriptional regulator	5.24
b1149	ymfN	e14 prophage; predicted DNA-binding transcriptional regulator	6.82
b1217	chaB	predicted cation regulator	1.26
b1285	yciR	RNase II stability modulator	1.2
b1375	ynaE	Qin prophage; predicted DNA-binding transcriptional regulator	1.04
b1499	ydeO	transcriptional regulator YdeO	1.42
b1552	cspI	cold shock-like protein cspI	1.83
b1739	osmE	DNA-binding transcriptional activator OsmE	1.68
b2015	yeeY	putative transcriptional regulator LYSR-type	1.08
b2369	evgA	DNA-binding transcriptional activator EvgA	1.47
b2370	evgS	hybrid sensory histidine kinase in two-component regulatory system with EvgA	1.01
b2852	ygeH	predicted transcriptional regulator	1.49
b2855	ygeK	putative 2-component transcriptional regulator	1.35
b3023	ygiV	predicted transcriptional regulator.Represses mcbR, involved in biofilm regulation	1.04
b3507	yhiF	putative transcriptional regulator YhiF	1.62
b3512	yhiE	DNA-binding transcriptional activator	2.57
b3515	yhiW	putative ARAC-type regulatory protein	1.36
b3516	gadX	DNA-binding transcriptional regulator GadX	2.53
b3555	yiaG	putative transcriptional regulator	1.64
b3743	asnC	DNA-binding transcriptional regulator AsnC	2.54
b3905	rhaS	transcriptional activator RhaS	1.35
b4299	yjhI	KpLE2 phage-like element; predicted DNA-binding transcriptional regulator	1.1
b1146	ymfT	e14 prophage; predicted DNA-binding transcriptional regulator	9.1
b4017	arpA	regulator of acetyl CoA synthetase	1.15
Transpoter and membrane protein
b0458	ylaC	predicted inner membrane protein	1.16
b0486	ybaT	putative amino acid/amine transport protein	2.32
b0543	emrE	multidrug efflux protein	1.97
b0612	citT	citrate:succinate antiporter	1.11
b0795	ybhG	predicted membrane fusion protein (MFP) component of efflux pump, membrane anchor	1.18
b0848	ybjM	predicted inner membrane protein	1.05
b0898	ycaD	MFS family transporter	1.07
b0974	hyaC	hydrogenase 1 b-type cytochrome subunit	2.69
b0978	appC	cytochrome bd-II oxidase subunit I	1.7
b0979	appB	cytochrome bd-II oxidase subunit II	1.62
b1025	ycdT	predicted diguanylate cyclase	1.24
b1038	csgF	predicted transport protein,curli assembly protein CsgF	1.16
b1039	csgE	curli assembly protein CsgE, predicted transport protein	1.28
b1101	ptsG	glucose-specific PTS system IIBC components	1.83
b1195	ymgE	predicted inner membrane protein transglycosylase associated protein	1.82
b1195	ymgE	hypothetical protein,transglycosylase associated protein, predicted inner membrane protein	1.82
b1440	ydcS	predicted spermidine/putrescine transporter subunit.Putative ABC transporter periplasmic binding protein	1.29
b1441	ydcT	Putative ABC transporter ATP-binding protein; function unknown	1.32
b1469	narU	nitrate/nitrite transporter	1.2
b1472	yddL	putaive outer membrane porin protein	1.07
b1492	xasA	acid sensitivity protein , predicted glutamate:gamma-aminobutyric acid antiporter	1.95
b1505	ydeT	Outer membrane usher protein FimD precursor	1.06
b1660	ydhC	inner membrane transport protein YdhC	1.46
b1682	sufC	cysteine desulfurase ATPase component ,component of SufBCD complex	1.58
b1726	yniB	predicted inner membrane protein	1.26
b1795	yeaQ	conserved inner membrane protein	2.32
b1964	yedS_3	putative outer membrane protein	1.4
b2130	yehY	predicted transporter subunit: membrane component of ABC superfamily	1.22
b2131	yehZ	predicted transporter subunit: periplasmic-binding component of ABC superfamily	1.18
b2135	yohC	predicted inner membrane protein	1.31
b2313	cvpA	membrane protein required for colicin V production	2.04
b2377	yfdY	predicted inner membrane protein	1.49
b2666	yqaE	predicted membrane protein,Function unknown, regulated by cyaR sRNA	1.08
b2670	ygaW	predicted inner membrane protein	1.05
b2702	srlA	glucitol/sorbitol-specific enzyme IIC component of PTS system	1.25
b2704	srlB	glucitol/sorbitol-specific PTS system component IIA	1.93
b2924	yggB	mechanosensitive channel MscS	1.21
b3006	exbB	biopolySLR transport protein ExbB	1.03
b3099	yqjE	conserved inner membrane protein	1.73
b3103	yhaH	putative cytochrome,predicted inner membrane protein	1.22
b3127	garP	predicted (D)-galactarate transporter	1.09
b3291	mscL	large-conductance mechanosensitive channel	1.07
b3506	slp	Slp, Outer membrane protein Slp precursor	2.85
b3508	yhiD	putative Mg(2+) transport ATPase	1.05
b3513	yhiU	multidrug resistance efflux protein MdtE	1.07
b3522	yhjD	conserved inner membrane protein	1.36
b3654	yicE	putative purine permease YicE, predicted transporter	2.1
b3909	kdgT	2-keto-3-deoxygluconate permease,2-keto-3-deoxy-D-gluconate transporter	3.65
b4111	proP	proline/glycine betaine transporter	1.21
b4149	blc	outer membrane lipoprotein Blc	1.77
b4296	yjhF	KpLE2 phage-like element; predicted transporter	1.25
b4336	yjiN	conserved inner membrane protein	1.03
b0453	ybaY	predicted outer membrane lipoprotein	1.59
b1408	ynbA	predicted inner membryane protein	1.03
b1965	yedS_3	putative outer membrane protein	1.21
b1979	yeeL_1	putative transport protein	1.19
Metabolism
b0073	leuB	3-isopropylmalate dehydrogenase	2.07
b0074	leuA	2-isopropylmalate synthase	1.21
b0186	ldcC	lysine decarboxylase, constitutive	1.12
b0485	ybaS	glutaminase	2.45
b0522	purK	phosphoribosylaminoimidazole carboxylase ATPase subunit	1.98
b0523	purE	phosphoribosylaminoimidazole carboxylase catalytic subunit	2.37
b0674	asnB	asparagine synthetase B	1.59
b0865	ybjP	predicted lipoprotein	1.11
b0897	ycaC	predicted hydrolase	1.78
b0945	pyrD	dihydroorotate dehydrogenase 2	1.16
b1198	dhaM	dihydroxyacetone kinase subunit M	1.03
b1199	dhaL	dihydroxyacetone kinase ADP-binding subunit	1.1
b1409	ynbB	putative phosphatidate cytidiltransferase	1.68
b1493	gadB	glutamate decarboxylase isozyme	2.12
b1661	cfa	cyclopropane fatty acyl phospholipid synthase	1.36
b1680	sufS	selenocysteine lyase	1.23
b1800	yeaU	putative tartrate dehydrogenase	1.98
b1849	purT	phosphoribosylglycinamide formyltransferase 2	2.06
b1927	amyA	cytoplasmic alpha-amylase	1.22
b1955	yedP	mannosyl-3-phosphoglycerate phosphatase	1.62
b2032	wbbK	lipopolysaccharide biosynthesis protein	1.18
b2033	wbbJ	predicted acyl transferase	1.35
b2034	wbbI	conserved protein, β-1,6-galactofuranosyltransferase	1.08
b2035	wbbH	O-antigen polySLRase	1.26
b2036	glf	UDP-galactopyranose mutase, FAD/NAD(P)-binding	1.38
b2037	rfbX	predicted polisoprenol-linked O-antigen transporter	1.3
b2038	rfbC	dTDP-4-deoxyrhamnose-3,5-epiSLRase	1.31
b2039	rfbA	glucose-1-phosphate thymidylyltransferase	1.18
b2040	rfbD	dTDP-4-dehydrorhamnose reductase subunit, NAD(P)-binding, of dTDP-L-rhamnose synthase	1
b2055	wcaE	glycosyl transferase	1.08
b2137	yohF	acetoin dehydrogenase	1.11
b2312	purF	amidophosphoribosyltransferase	1.55
b2464	talA	transaldolase A	1.77
b2465	tktB	transketolase	1.93
b2476	purC	phosphoribosylaminoimidazole-succinocarboxamide synthase	1.82
b2499	purM	phosphoribosylaminoimidazole synthetase	2.22
b2500	purN	phosphoribosylglycinamide formyltransferase	1.19
b2551	glyA	serine hydroxymethyltransferase	1.29
b2557	purL	phosphoribosylformyl-glycineamide synthetase	1.83
b2599	pheA	bifunctional chorismate mutase/prephenate dehydratase	2.58
b2654	ygaQ	hypothetical protein YgaQ	1.93
b2656	ygaR	hypothetical protein YgaR	1.41
b2657	yqaC	conserved protein YqaC	1.06
b2658	yqaD	conserved protein YqaD	1.11
b2705	srlD	sorbitol-6-phosphate dehydrogenase	1.95
b2842	kduD	2-deoxy-D-gluconate 3-dehydrogenase	3.88
b2843	kduI	5-keto-4-deoxyuronate isoSLRase	4.14
b2913	serA	D-3-phosphoglycerate dehydrogenase	1.26
b3012	dkgA	2,5-diketo-D-gluconate reductase A	1.19
b3517	gadA	glutamate decarboxylase isozyme	1.62
b4005	purD	phosphoribosylglycinamide synthetase phosphoribosylamine-glycine ligase	2.55
b4006	purH	bifunctional phosphoribosylaminoimidazolecarboxamide formyltransferase/IMP cyclohydrolase	2
b4014	aceB	malate synthase	1.47
b4015	aceA	isocitrate lyase	1.2
b4127	yjdJ	predicted acyltransferase with acyl-CoA N-acyltransferase domain	1.61
b4187	aidB	isovaleryl CoA dehydrogenase	1.31
b4245	pyrB	aspartate carbamoyltransferase catalytic subunit	1.01
b4246	pyrL	pyrBI operon leader peptide	1.39
b4297	yjhG	KpLE2 phage-like element; predicted dehydratase	1.21
b4298	yjhH	KpLE2 phage-like element; predicted lyase/synthase	1.4
b2031	wbbL-1	lipopolysaccharide biosynthesis protein	1.15
b2097	fbaB	fructose-bisphosphate aldolase	1.87
b3526	kdgK	2-dehydro-3-deoxygluconokinase, ketodeoxygluconokinase	2.04
DNA recombination and DNA repair
b1140	intE	e14 prophage; predicted integrase	10
b1141	xisE	e14 prophage; predicted excisionase	8.17
b1158	pin	e14 prophage; site-specific DNA recombinase	4.05
b1159	mcrA	e14 prophage; 5-methylcytosine-specific restriction endonuclease B	10.02
b1345	intR	Rac prophage; integrase	1.11
b1459	yncM	H repeat-containing protein	1.1
b1936	intG	predicted defective phage integrase IntG	1.04
b0539	ybcC	putative exonuclease encoded by prophage	3.04
other or undefined functions
b0218	yafU	Predicted protein	1.13
b0362	yaiF	predicted protein	1.81
b0363	yaiP	predicted glucosyltransferase	1.34
b0370	ykiB	predicted protein	2.3
b0371	yaiT	hypothetical protein	1.03
b0384	psiF	hypothetical protein	1.82
b0387	yaiI	hypothetical protein	1.03
b0439	lon	DNA-binding ATP-dependent protease La	1.88
b0499	ylbH	RhsD, hypothetical protein	1.26
b0500	ybbD	hypothetical protein	1.69
b0510	ybbV	hypothetical protein	1.57
b0533	sfmH	SfmH ,predicted fimbrial-like adhesin protein	1.04
b0542	renD	Ren protein	1.93
b0548	ninE	prophage protein NinE	1
b0549	ybcO	hypothetical protein	1.94
b0553	nmpC	hypothetical protein	2.86
b0646	ybeS	predicted chaperone	1.03
b0690	ybfG	predicted protein	1.09
b0707	ybgA	hypothetical protein	1.62
b0790	ybhP	predicted DNase	1.26
b0803	ybiI	hypothetical protein	1.72
b0839	dacC	D-alanyl-D-alanine carboxypeptidase fraction C	1
b0871	poxB	pyruvate dehydrogenase (pyruvate oxidase), thiamin-dependent, FAD-binding	1.19
b0972	hyaA	hydrogenase-1 small subunit	2.85
b0973	hyaB	hydrogenase 1 large subunit	2.27
b0975	hyaD	hydrogenase 1 maturation protease	2.09
b0976	hyaE	hydrogenase-1 operon protein HyaE	1.69
b0977	hyaF	hydrogenase-1 operon protein HyaF	1.47
b0980	appA	phosphoanhydride phosphorylase	1.06
b1000	cbpA	curved DNA-binding protein CbpA	1.47
b1001	yccE	predicted protein	1.77
b1003	yccJ	hypothetical protein	1.72
b1051	msyB	hypothetical protein	1.71
b1137	ymfD	e14 prophage; predicted SAM-dependent methyltransferase	8.66
b1139	lit	cell death peptidase, inhibitor of T4 late gene expression	8.92
b1142	ymfH	e14 prophage;hypothetical protein	7.79
b1143	ymfI	e14 prophage; predicted protein	10.72
b1144	ymfJ	e14 prophage; predicted protein	9.32
b1148	ymfM	e14 prophage; predicted protein	6.26
b1150	ymfR	e14 prophage; predicted protein	6.12
b1151	ymfO	e14 prophage; predicted protein	8.14
b1152	ymfP	e14 prophage; predicted protein	4.48
b1153	ymfQ	e14 prophage; conserved protein	6.89
b1154	ycfK	e14 prophage; predicted protein	7.02
b1155	ymfS	e14 prophage; predicted protein	7.96
b1156	tfaE	e14 prophage; predicted tail fiber assembly protein	8.82
b1157	stfE	putative tail fiber protein	8.17
b1182	hlyE	hemolysin E	2.09
b1188	ycgB	hypothetical protein	2.21
b1233	ychJ	hypothetical protein	1.15
b1347	ydaC	hypothetical protein	1.26
b1351	racC	hypothetical protein	1.1
b1352	kilR	FtsZ inhibitor protein	1.22
b1455	yncH	hypothetical protein,Required for swarming phenotype, function unknown	1.68
b1470	yddJ	hypothetical protein	1.44
b1471	yddK	putative glycoprotein	2.16
b1536	ydeI	hypothetical protein	1.51
b1550	gnsB	Qin prophage; predicted protein	1.81
b1556	essQ	Qin prophage; predicted S lysis protein	1.39
b1576	ydfD	hypothetical protein	1.13
b1614	ydgA	hypothetical protein	1.38
b1625	cnu	H-NS- and StpA-binding protein	1.1
b1648	ydhL	hypothetical protein	1.36
b1668	ydhS	conserved protein with FAD/NAD(P)-binding domain	1.38
b1679	sufE	cysteine desufuration protein SufE	1.39
b1681	sufD	cysteine desulfurase activator complex subunit SufD	1.04
b1683	sufB	cysteine desulfurase activator complex subunit SufB	1.7
b1684	sufA	iron-sulfur cluster assembly scaffold protein	2.08
b1687	ydiJ	putative oxidase	1.05
b1707	ydiV	hypothetical protein, Putative cyclic-di-GMP phosphodiesterase, function unknown	1.51
b1715	pheM	phenylalanyl-tRNA synthetase (pheST) operon leader peptide	1.13
b1724	ydiZ	hypothetical protein	1.43
b1783	yeaG	conserved protein with nucleoside triphosphate hydrolase domain	2.13
b1836	yebV	hypothetical protein	2.12
b1837	yebW	hypothetical protein	1.77
b1902	yecI	ferritin-like protein	1.15
b1933	yedN_1	hypothetical protein	1.29
b1934	yedN_1	hypothetical protein	1.07
b1935	yedM	conserved protein	2.04
b1953	yodD	hypothetical protein	2.62
b1957	yodC	hypothetical protein	1.93
b1990	erfK	conserved protein with NAD(P)-binding Rossmann-fold domain	1.55
b2080	yegP	hypothetical protein	2.09
b2112	yehE		1.24
b2115	molR_1	hypothetical protein	1.02
b2266	elaB	hypothetical protein	1.53
b2269	elaD	predicted enzyme	1.01
b2273	yfbN	predicted protein	1.07
b2302	yfcG	predicted glutathione S-transferase	1.02
b2443	yffL	CPZ-55 prophage; predicted protein	1.41
b2444	yffM	CPZ-55 prophage; predicted protein	3.24
b2445	yffN	CPZ-55 prophage; predicted protein	2.7
b2448	yffQ	CPZ-55 prophage; predicted protein	1.16
b2449	yffR	CPZ-55 prophage; predicted protein	3.14
b2562	yfhL	predicted 4Fe-4S cluster-containing protein	1.01
b2598	pheL	pheA gene leader peptide	1.95
b2649	ypjB	hypothetical protein	1.3
b2672	ygaM	hypothetical protein	2.7
b2849	yqeK	hypothetical protein	1.15
b2850	ygeF	hypothetical protein	1.52
b2853	ygeI	predicted protein	1.77
b2854	pbI	predicted peptidoglycan-binding enzyme	1.62
b2857	ygeM	hypothetical protein	1.67
b2858	ygeN	hypothetical protein	1.22
b3024	ygiW	hypothetical protein	1.11
b3097	yqjC	hypothetical protein	1.75
b3098	yqjD	hypothetical protein	1.44
b3100	yqiK	hypothetical protein	1.66
b3102	yqjG	predicted S-transferase	1.2
b3103	yhaH	putative cytochrome, predicted inner membrane protein	1.22
b3239	yhcO	predicted barnase inhibitor	1.74
b3336	bfr	bacterioferritin, iron storage and detoxification protein	1.44
b3361	fic	cell filamentation protein Fic	1.26
b3362	yhfG	hypothetical protein	1.28
b3443	yrhA	hypothetical protein	1.31
b3448	yhhA	hypothetical protein	1.25
b3922	yiiS	hypothetical protein	1.05
b4038	yjbI	hypothetical protein	1.03
b4047	yjbL	predicted protein	2.92
b4048	yjbM	predicted protein	1.16
b4066	yjcF	conserved protein	1.31
b4107	phnB	hypothetical protein	1.21
b4126	yjdI	hypothetical protein	1.98
b4252	yjgK	hypothetical protein	2.52
b4314	fimA	FimA , major type 1 subunit fimbrin (pilin)	1.47
b4325	yjiC	predicted protein	1.06
b4376	osmY	periplasmic protein	1.2
b4455	hokA	small toxic polypeptide	1.02

## Sheet: 0min-down
Blattner number	Gene name	Functional description	Log2 ratio
response to stress
b0311	betA	choline dehydrogenase, a flavoprotein	-5.66
b0312	betB	betaine aldehyde dehydrogenase, NAD-dependent	-8.31
b0314	betT	choline transport protein BetT	-9.43
Regulation
b0272	yagI	CP4-6 prophage; predicted DNA-binding transcriptional regulator	-6.82
b0282	yagP	putative LysR-like transcriptional regulator	-9.08
b0294	ykgK	putative regulator	-9.28
b0305	ykgD	putative ARAC-type regulatory protein regulator	-7.26
b0313	betI	transcriptional regulator BetI	-7.28
b0315	yahA	hypothetical protein	-9.32
b0316	yahB	putative transcriptional regulator YahB	-8.55
b0330	prpR	DNA-binding transcriptional activator	-4.95
b0338	cynR	DNA-binding transcriptional regulator CynR	-7.2
b0346	mhpR	DNA-binding transcriptional activator MhpR	-1.81
b0852	rimK	ribosomal protein S6 modification protein	-1.53
b1303	pspF	phage shock protein operon transcriptional activator	-1.64
b1827	kdgR	transcriptional regulator kdgR	-1.44
b2125	yehT	putative two-component response-regulatory protein YehT	-1.07
b3118	tdcA	DNA-binding transcriptional activator TdcA	-2.76
transport and membrane
b0260	mmuP	CP4-6 prophage; predicted S-methylmethionine transporter	-6.05
b0262	afuC	CP4-6 prophage; predicted ferric transporter subunit	-6
b0270	yagG	CP4-6 prophage; predicted sugar transporter	-8.8
b0288	ykgJ	putative ferredoxin	-5.7
b0307	ykgF	putative electron transport protein ykgF	-7.69
b0328	yahN	putative neutral amino-acid efflux system	-8.06
b0336	codB	cytosine permease	-8.34
b0353	mhpT	putative 3-hydroxyphenylpropionic transporter MhpT	-1.09
b1243	oppA	oligopeptide transport periplasmic binding protein	-2.56
b1244	oppB	oligopeptide transporter permease	-1.54
b1245	oppC	oligopeptide transport system permease protein oppC	-1.23
b1246	oppD	oligopeptide transporter ATP-binding component	-1.27
b1247	oppF	oligopeptide ABC transporter ATP-binding protein	-1.25
b2150	mglB	D-galactose-binding periplasmic protein precursor	-1.17
b2240	glpT	sn-glycerol-3-phosphate transporter	-1.26
b2429	murP	N-acetylmuramic acid phosphotransfer permease，fused predicted PTS enzymes: IIB component/IIC component	-1.09
b2964	nupG	nucleoside permease nupG	-1.53
b3116	tdcC	threonine/serine transporter TdcC	-4.49
b3476	nikA	nickel-binding periplasmic protein precursor	-1.81
b3528	dctA	C4-dicarboxylic acid, orotate and citrate transporter	-1
b3573	yiaI	putative electron transport protein ysaA	-1.18
b4032	malG	maltose transporter permease	-1.19
b4033	malF	maltose transporter membrane protein	-1.36
b4034	malE	maltose ABC transporter periplasmic protein	-1.25
b4035	malK	maltose/maltodextrin transporter ATP-binding protein	-1.62
b4036	lamB	maltose outer membrane porin (maltoporin)	-2.02
b4037	malM	maltose regulon periplasmic protein	-1.81
b4240	treB	trehalose(maltose)-specific PTS system components IIBC	-2.19
metabolism
b0114	aceE	pyruvate dehydrogenase subunit E1	-1.37
b0261	mmuM	CP4-6 prophage; S-methylmethionine:homocysteine methyltransferase	-7.38
b0268	yagE	CP4-6 prophage; predicted lyase/synthase	-8.84
b0269	yagF	CP4-6 prophage; predicted dehydratase	-5.15
b0271	yagH	CP4-6 prophage; predicted xylosidase/arabinosidase	-6.01
b0273	argF	CP4-6 prophage; ornithine carbamoyltransferase 2, chain F	-7.34
b0297	eaeH	putative adhesin	-7.02
b0304	ykgC	pyridine nucleotide-disulfide oxidoreductase	-6.31
b0323	yahI	predicted carbamate kinase-like protein	-5.76
b0325	yahK	putative oxidoreductase	-6.98
b0331	prpB	2-methylisocitrate lyase	-4.2
b0333	prpC	methylcitrate synthase	-3.84
b0335	prpE	predicted propionyl-CoA synthetase with ATPase domain	-5.87
b0337	codA	cytosine deaminase	-7.64
b0339	cynT	carbonic anhydrase	-7.64
b0350	mhpD	2-keto-4-pentenoate hydratase	-4.35
b1780	yeaD	hypothetical protein	-1
b2878	ygfK	putative selenate reductase subunit YgfK	-1.03
b2889	idi	isopentenyl-diphosphate delta-isoSLRase	-1.12
b3111	tdcG	L-serine dehydratase 1	-4.28
b3112	tdcG	L-serine dehydratase 1	-4.27
b3114	tdcE	putative formate acetyltransferase 3	-4.53
b3115	tdcD	propionate/acetate kinase	-4.25
b3117	tdcB	threonine dehydratase	-4.27
b3665	ade	cryptic adenine deaminase	-1.19
b4239	treC	trehalose-6-phosphate hydrolase	-2.37
DNA recombination
b0267	yagA	CP4-6 prophage; predicted DNA-binding transcriptional regulator	-6.83
b0278	yagL	CP4-6 prophage; DNA-binding protein	-5.86
b0281	intF	CP4-6 prophage; predicted phage integrase	-9.13
b0299	tra5_5	IS3 element protein InsF	-1.18
others and function unknown
b0228	yafM	conserved protein	-1.21
b0263	afuB	pseudo	-6.4
b0266	yagB	pseudo	-7.67
b0276	yagJ	CP4-6 prophage; predicted protein	-6.05
b0277	yagK	CP4-6 prophage; conserved protein	-5.61
b0279	yagM	CP4-6 prophage; predicted protein	-6.94
b0280	yagN	CP4-6 prophage; predicted protein	-8.92
b0283	yagQ	hypothetical protein	-9.67
b0287	yagU	hypothetical protein	-9.15
b0289	yagV	hypothetical protein	-6.89
b0290	yagW	putative receptor	-7.6
b0291	yagX	hypothetical protein	-7.77
b0292	yagY	hypothetical protein	-5.44
b0293	yagZ	hypothetical protein	-7.35
b0295	ykgL	hypothetical protein	-7.34
b0300	ykgA	pseudo	-8.7
b0301	ykgB	hypothetical protein	-8.15
b0303	ykgI	hypothetical protein	-9.48
b0306	ykgE	putative dehydrogenase subunit	-5.16
b0308	ykgG	hypothetical protein	-6.04
b0310	ykgH	hypothetical protein	-7.57
b0317	yahC	hypothetical protein	-8.72
b0318	yahD	putative transcription factor	-6.88
b0319	yahE	hypothetical protei	-5.32
b0320	yahF	putative oxidoreductase subunit	-6.88
b0321	yahG	hypothetical protein	-4.58
b0324	yahJ	deaminase	-7.48
b0326	yahL	hypothetical protein	-7.97
b0327	yahM	hypothetical protein	-7.04
b0578	nfnB	dihydropteridine reductase	-1.37
b0850	ybjC	hypothetical protein	-2.11
b0851	nfsA	nitroreductase A	-1.95
b1164	ycgZ	hypothetical protein	-1.59
b1165	ymgA	predicted protein	-1.66
b1166	ymgB	predicted protein	-1.5
b1406	ydbC	putative oxidoreductase	-1.14
b1671	ydhX	putative ferredoxin-like protein ydhX	-1.17
b1672	ydhW	hypothetical protein	-1.01
b2173	yeiR	hypothetical protein	-1.38
b2875	yqeB	putative synthase	-1.43
b2876	yqeC	hypothetical protein	-1.76
b2880	ygfM	putative selenate reductase subunit YgfM	-1.08
b3109	yhaN	hypothetical protein	-1.12
b3113	tdcf	predicted L-PSP (mRNA) endoribonuclease	-3.92
b3160	yhbW	hypothetical protein	-2
b3924	fpr	ferredoxin-NADP reductase	-1.12
b4217	ytfK	hypothetical protein	-1.33
b4335	yjiM	hypothetical protein	-1.44

## Sheet: 10min-up
Blattner number	Gene name	Functional description	Log2 ratio
response to stress
b1004	wrbA	NAD(P)H:quinone oxidoreductase	1.2294
b1283	osmB	lipoprotein	2.43187
b1304	pspA	regulatory protein for phage-shock-protein operon	1.68271
b1482	osmC	Lipoyl-dependent Cys-based peroxidase, hydroperoxide resistance; salt-shock inducible membrane protein; peroxiredoxin	1.78229
b1500	safA	Two component system connector membrane protein, EvgSA to PhoQP	1.91748
b1597	asr	acid shock-inducible periplasmic protein	1.1297
b1710	btuE	glutathione peroxidase	1.39485
b1732	katE	hydroperoxidase HPII(III) (catalase)	1.97116
b1838	pphA	serine/threonine-specific protein phosphatase 1	1.00057
b1896	otsA	trehalose-6-phosphate synthase	2.48927
b1897	otsB	trehalose-6-phosphate phosphatase, biosynthetic	3.16556
b1967	hchA	Hsp31 molecular chaperone	1.82507
b2851	ygeG	predicted chaperone	1.50994
b3153	yhbO	stress-resistance protein	1.30736
b3494	uspB	universal stress (ethanol tolerance) protein B	1.31878
b4045	yjbJ	conserved protein, UPF0337 family	1.38532
b4411	ecnB	entericidin B membrane lipoprotein	1.88955
regulation
b0435	bolA	stationary-phase morphogene, transcriptional repressor for mreB; also regulator for dacA, dacC, and ampC	1.38051
b0535	fimZ	predicted DNA-binding transcriptional regulator	1.14774
b0564	appY	DNA-binding global transcriptional activator; DLP12 prophage	2.18749
b0999	cbpM	modulator of CbpA co-chaperone	1.62014
b1040	csgD	DNA-binding transcriptional activator for csgBA	1.05146
b1160	iraM	RpoS stabilzer during Mg starvation, anti-RssB factor	1.34458
b1162	ycgE	repressor of blue light-responsive genes	1.0568
b1217	chaB	cation transport regulator	1.55618
b1285	gmr	cyclic-di-GMP phosphodiesterase; csgD regulator; modulator of Rnase II stability	1.51472
b1341	ydaM	diguanylate cyclase, csgD regulator	1.51365
b1499	ydeO	transcriptional activator for mdtEF	1.15307
b1552	cspI	Qin prophage; cold shock protein	1.77025
b1739	osmE	DNA-binding transcriptional activator	1.28176
b2015	yeeY	predicted DNA-binding transcriptional regulator	1.00289
b2369	evgA	DNA-binding response regulator in two-component regulatory system with EvgS	1.07845
b2370	evgS	hybrid sensory histidine kinase in two-component regulatory system with EvgA	1.30124
b2855	ygeK	predicted DNA-binding transcriptional regulator	1.25615
b2856	ygeL	hypothetical protein	1.5147
b3023	ygiV	transcriptional repressor for mcbR biofilm gene	1.22794
b3119	tdcR	DNA-binding transcriptional activator	1.16892
b3507	dctR	predicted DNA-binding ranscriptional regulator	1.63078
b3512	gadE	DNA-binding transcriptional activator	2.90369
b3515	gadW	transcriptional activator of gadA and gadBC in absence of GadX	1.60538
b3516	gadX	DNA-binding transcriptional dual regulator	2.13355
b3555	yiaG	predicted transcriptional regulator, HTH_CROC1 family	2.28069
b3743	asnC	DNA-binding transcriptional dual regulator	2.69669
b4017	arpA	ankyrin repeat protein	1.75075
b4299	yjhI	KpLE2 phage-like element; predicted DNA-binding transcriptional regulator	1.76838
transport and membrane
b0155	clcA	chloride channel, voltage-gated	1.07582
b0218	yafU	hypothetical protein,an inner membrane protein	1.19089
b0453	ybaY	outer membrane lipoprotein	1.19509
b0458	ylaC	inner membrane protein, DUF1449 family	1.4289
b0486	ybaT	predicted transporter	2.94104
b0580	ybdJ	predicted inner membrane protein	1.08158
b0792	ybhR	predicted transporter subunit: membrane component of ABC superfamily	1.02275
b0862	artQ	arginine transporter subunit	1.12831
b0864	artP	arginine transporter subunit	1.17184
b0906	ycaP	inner membrane protein, UPF0702 family	1.01506
b0974	hyaC	hydrogenase 1, b-type cytochrome subunit	3.34286
b0978	appC	cytochrome bd-II oxidase, subunit I	2.30677
b0979	appB	cytochrome bd-II oxidase, subunit II	2.32484
b1025	ycdT	diguanylate cyclase	1.50243
b1029	ycdU	predicted inner membrane protein	1.11356
b1038	csgF	outer membrane protein involved in curlin assembly/transport	1.4532
b1039	csgE	curli production assembly/transport componen	1.29714
b1101	ptsG	fused glucose-specific PTS enzymes: IIB component/IIC component	1.94853
b1195	ymgE	predicted inner membrane protein	2.33215
b1330	ynaI	MscS family inner membrane protein	1.06792
b1440	ydcS	polyhydroxybutyrate (PHB) synthase, ABC transporter periplasmic binding protein homolog	1.56516
b1441	ydcT	predicted spermidine/putrescine transporter subunit	1.30938
b1469	narU	nitrate/nitrite transporter	1.84134
b1472	yddL	putative outer membrane porin protein	1.60042
b1492	gadC	predicted glutamate:gamma-aminobutyric acid antiporter	1.92078
b1496	yddA	fused predicted multidrug transporter subunits of ABC superfamily: membrane component/ATP-binding component	1.03816
b1660	ydhC	predicted transporter	2.14323
b1682	sufC	component of SufBCD complex, ATP-binding component of ABC superfamily	1.92356
b1726	yniB	predicted inner membrane protein	1.16001
b1795	yeaQ	conserved protein, UPF0410 family	2.2721
b1820	yobD	inner membrane protein, UPF0266 family	1.2862
b1907	tyrP	tyrosine transporter	1.36921
b1964	yedS_1	hypothetical protein	1.14284
b1980	yeeL_1	hypothetical protein	1.07123
b2109	yehB	predicted outer membrane protein	1.18943
b2129	yehX	predicted transporter subunit: ATP-binding component of ABC superfamily	1.06489
b2130	yehY	predicted transporter subunit: membrane component of ABC superfamily	1.54274
b2131	osmF	predicted transporter subunit: periplasmic-binding component of ABC superfamily	1.55739
b2135	yohC	inner membrane protein, Yip1 family	1.67133
b2141	yohJ	inner membrane protein, UPF0299 family	1.02217
b2313	cvpA	membrane protein required for colicin V production	2.20082
b2347	yfdC	predicted inner membrane protein	1.03431
b2376	ypdI	predicted lipoprotein involved in colanic acid biosynthesis	1.02841
b2704	srlB	glucitol/sorbitol-specific enzyme IIA component of PTS	2.134
b2789	gudP	predicted D-glucarate transporter	1.0265
b2848	yqeJ	predicted protein	1.1512
b2924	mscS	mechanosensitive channel protein, small conductance	1.07152
b3006	exbB	membrane spanning protein in TonB-ExbB-ExbD complex	1.30011
b3099	yqjE	inner membrane protein, DUF1469 family	1.33558
b3103	yhaH	inner membrane protein, DUF805 family	1.17715
b3127	garP	predicted (D)-galactarate transporter	1.40012
b3506	slp	outer membrane lipoprotein	2.97572
b3508	yhiD	predicted Mg(2+) transport ATPase, inner membrane protein	1.30869
b3513	mdtE	multidrug resistance efflux transporter	1.617
b3514	mdtF	multidrug transporter, RpoS-dependent	1.09643
b3522	yhjD	putative alternate lipid exporter, suppressor of msbA and KDO essentiality, inner membrane protein	1.63278
b3524	yhjG	Inner membrane protein, AsmA family	1.09024
b3654	xanP	xanthine permease	2.32623
b3909	kdgT	2-keto-3-deoxy-D-gluconate transporter	3.96644
b4111	proP	proline/glycine betaine transporter	1.30714
b4149	blc	outer membrane lipoprotein (lipocalin), cell division and growth function	2.4669
b4296	yjhF	KpLE2 phage-like element; predicted transporter	1.74375
b4336	yjiN	zinc-type alcohol dehydrogenase-like protein	1.16347
metabolism
b0071	leuD	3-isopropylmalate dehydratase small subunit	1.51735
b0072	leuC	3-isopropylmalate dehydratase large subunit	1.86566
b0073	leuB	3-isopropylmalate dehydrogenase, NAD(+)-dependent	2.66279
b0074	leuA	2-isopropylmalate synthase	1.72903
b0142	folK	2-amino-4-hydroxy-6-hydroxymethyldihyropteridine pyrophosphokinase	1.0582
b0186	ldcC	lysine decarboxylase 2, constitutive	1.54382
b0439	lon	DNA-binding ATP-dependent protease La	2.40562
b0485	ybaS	glutaminase	3.18514
b0523	purE	N5-carboxyaminoimidazole ribonucleotide mutase	2.47905
b0533	sfmH	predicted fimbrial-like adhesin protein	1.63743
b0581	ybdK	weak gamma-glutamyl:cysteine ligase	1.30298
b0616	citE	citrate lyase, citryl-ACP lyase (beta) subunit	1.16602
b0622	pagP	phospholipid:lipid A palmitoyltransferase	1.01803
b0674	asnB	asparagine synthetase B	2.05992
b0721	sdhC	succinate dehydrogenase, membrane subunit, binds cytochrome b556	1.17045
b0865	ybjP	lipoprotein	1.44674
b0897	ycaC	predicted hydrolase, isochorismatase family	1.87837
b0907	serC	3-phosphoserine/phosphohydroxythreonine aminotransferase	1.24422
b0908	aroA	5-enolpyruvylshikimate-3-phosphate synthetase	1.10154
b1062	pyrC	dihydro-orotase	1.02729
b1131	purB	adenylosuccinate lyase	1.66163
b1198	dhaM	fused predicted dihydroxyacetone-specific PTS enzymes: HPr component/EI component	1.35793
b1199	dhaL	dihydroxyacetone kinase, C-terminal domain	1.39146
b1200	dhaK	dihydroxyacetone kinase, PTS-dependent, dihydroxyacetone-binding subunit	1.21994
b1249	cls	cardiolipin synthase 1	1.22409
b1298	puuD	gamma-Glu-GABA hydrolase	1.35858
b1352	kilR	Rac prophage; inhibitor of ftsZ, killing protein	1.19364
b1409	ynbB	predicted CDP-diglyceride synthase	1.5883
b1466	narW	nitrate reductase 2 (NRZ), delta subunit (assembly subunit)	1.09376
b1468	narZ	nitrate reductase 2 (NRZ), alpha subunit	1.2386
b1493	gadB	glutamate decarboxylase B, PLP-dependent	1.70907
b1519	tam	trans-aconitate methyltransferase	1.22246
b1661	cfa	cyclopropane fatty acyl phospholipid synthase (unsaturated-phospholipid methyltransferase)	1.29765
b1678	ynhG	murein L,D-transpeptidase	2.04432
b1680	sufS	cysteine desulfurase, stimulated by SufE; selenocysteine lyase, PLP-dependent	1.57788
b1694	ydiF	fused predicted acetyl-CoA:acetoacetyl-CoA transferase: alpha subunit/beta subunit	1.46646
b1713	pheT	phenylalanine tRNA synthetase, beta subunit	1.67912
b1714	pheS	phenylalanine tRNA synthetase, alpha subunit	1.61342
b1715	pheM	phenylalanyl-tRNA synthetase operon leader peptide	1.6927
b1800	dmlA	D-malate oxidase, NAD-dependent; probable tartrate dehydrogenase	1.50101
b1849	purT	phosphoribosylglycinamide formyltransferase 2	2.50258
b1850	eda	multifunctional 2-keto-3-deoxygluconate 6-phosphate aldolase and 2-keto-4-hydroxyglutarate aldolase and oxaloacetate decarboxylase	1.13074
b1927	amyA	cytoplasmic alpha-amylase	1.81062
b1955	yedP	predicted mannosyl-3-phosphoglycerate phosphatase	1.76561
b2032	wbbK	lipopolysaccharide biosynthesis protein	1.02097
b2033	wbbJ	predicted lipopolysaccharide biosynthesis O-acetyl transferase	1.04956
b2034	wbbI	d-Galf:alpha-d-Glc beta-1,6-galactofuranosyltransferase	1.10734
b2035	rfc	O-antigen polymerase	1.08854
b2036	glf	UDP-galactopyranose mutase, FAD/NAD(P)-binding	1.09623
b2037	rfbX	predicted polisoprenol-linked O-antigen transporter	1.25434
b2038	rfbC	dTDP-4-deoxyrhamnose-3,5-epimerase	1.06319
b2039	rfbA	glucose-1-phosphate thymidylyltransferase	1.02863
b2097	fbaB	fructose-bisphosphate aldolase class I	1.76814
b2110	yehC	predicted periplasmic pilin chaperone	1.23055
b2137	yohF	predicted oxidoreductase with NAD(P)-binding Rossmann-fold domain	1.36432
b2253	arnB	uridine 5'-(beta-1-threo-pentapyranosyl-4-ulose diphosphate) aminotransferase, PLP-dependent	1.0941
b2263	menH	2-succinyl-6-hydroxy-2,4-cyclohexadiene-1-carboxylate synthase	1.44044
b2264	menD	bifunctional 2-oxoglutarate decarboxylase/ SHCHC synthase	1.00977
b2269	elaD	protease, capable of cleaving an AMC-ubiquitin model substrate	1.31187
b2312	purF	amidophosphoribosyltransferase	1.86532
b2464	talA	transaldolase A	2.33002
b2465	tktB	transketolase 2, thiamin-binding	2.53798
b2476	purC	phosphoribosylaminoimidazole-succinocarboxamide synthetase	2.31098
b2499	purM	phosphoribosylaminoimidazole synthetase	3.04657
b2500	purN	phosphoribosylglycinamide formyltransferase 1	1.79576
b2551	glyA	serine hydroxymethyltransferase	1.32659
b2557	purL	phosphoribosylformyl-glycineamide synthetase	2.12309
b2599	pheA	fused chorismate mutase P/prephenate dehydratase	1.312
b2600	tyrA	fused chorismate mutase T/prephenate dehydrogenase	1.11083
b2601	aroF	3-deoxy-D-arabino-heptulosonate-7-phosphate synthase, tyrosine-repressible	1.16767
b2605	yfiB	probable positive effector of YfiN activity, OM lipoprotein	1.25634
b2654	ygaQ_1	hypothetical protein	1.57226
b2656	ygaQ_2	hypothetical protein	1.87359
b2657	ygaQ_3	putative enzyme	1.43419
b2705	srlD	sorbitol-6-phosphate dehydrogenase	1.98569
b2842	kduD	2-deoxy-D-gluconate 3-dehydrogenase	4.19511
b2843	kduI	4-deoxy-L-threo-5-hexosulose-uronate ketol-isomerase	4.86548
b2913	serA	D-3-phosphoglycerate dehydrogenase	1.46072
b2979	glcD	glycolate oxidase subunit, FAD-linked	1.32404
b3012	dkgA	2,5-diketo-D-gluconate reductase A	1.77243
b3212	gltB	glutamate synthase, large subunit	1.37102
b3213	gltD	glutamate synthase, 4Fe-4S protein, small subunit	1.22692
b3432	glgB	1,4-alpha-glucan branching enzyme	1.51471
b3517	gadA	glutamate decarboxylase A, PLP-dependent	1.77206
b3526	kdgK	ketodeoxygluconokinase	2.35702
b3588	aldB	aldehyde dehydrogenase B	1.05253
b3729	glmS	L-glutamine:D-fructose-6-phosphate aminotransferase	1.03986
b3956	ppc	phosphoenolpyruvate carboxylase	1.22153
b4005	purD	phosphoribosylglycinamide synthetase phosphoribosylamine-glycine ligase	2.50758
b4006	purH	fused IMP cyclohydrolase/phosphoribosylaminoimidazolecarboxamide formyltransferase	2.35564
b4014	aceB	malate synthase A	3.02711
b4015	aceA	isocitrate lyase	2.9912
b4016	aceK	isocitrate dehydrogenase kinase/phosphatase	1.24955
b4127	yjdJ	predicted acyltransferase with acyl-CoA N-acyltransferase domain	1.88588
b4187	aidB	isovaleryl CoA dehydrogenase	1.574
b4244	pyrI	aspartate carbamoyltransferase, regulatory subunit	1.09057
b4245	pyrB	aspartate carbamoyltransferase, catalytic subunit	1.19201
b4246	pyrL	pyrBI operon leader peptide	1.41703
b4297	yjhG	KpLE2 phage-like element; predicted dehydratase	2.03923
b4298	yjhH	KpLE2 phage-like element; predicted lyase/synthase	2.20536
b4314	fimA	major type 1 subunit fimbrin (pilin)	1.0261
b4316	fimC	chaperone, periplasmic	1.53758
DNA recombination and repair
b0552	insH	IS5 transposase and trans-activator	2.04095
b0708	phr	deoxyribodipyrimidine photolyase, FAD-binding	1.28943
b1345	intR	Rac prophage; integrase	1.04578
b1459	yncM	hypothetical protein	1.62959
b4312	fimB	tyrosine recombinase/inversion of on/off regulator of fimA	1.00933
others and function unknown
b0136	yadK	predicted fimbrial-like adhesin protein	1.14493
b0363	yaiP	predicted glucosyltransferase	1.41875
b0364	yaiS	conserved protein	1.00248
b0370	ykiB	hypothetical protein	1.77734
b0384	psiF	conserved protein, PsiF family, pho regulon	1.97357
b0498	ybbC	predicted protein	1.5279
b0499	ylbH	hypothetical protein	1.46121
b0500	ybbD	hypothetical protein	1.90534
b0510	ybbV	hypothetical protein	1.78209
b0554	essD	DLP12 prophage; predicted phage lysis protein	1.02625
b0690	ybfG	hypothetical protein	1.10037
b0707	ybgA	conserved protein, DUF1722 family	2.08558
b0753	ybgS	conserved protein	1.09372
b0790	ybhP	conserved protein, endo/exonuclease/phosphatase family PFAM PF03372	1.37269
b0803	ybiI	DksA-type zinc finger protein, function unknown	1.63227
b0833	yliE	predicted cyclic-di-GMP phosphodiesterase, inner membrane protein	1.15703
b0839	dacC	D-alanyl-D-alanine carboxypeptidase (penicillin-binding protein 6a)	1.31865
b0871	poxB	pyruvate dehydrogenase (pyruvate oxidase), thiamin-dependent, FAD-binding	1.80532
b0955	ycbZ	predicted peptidase	1.10609
b0972	hyaA	hydrogenase 1, small subunit	3.43363
b0973	hyaB	hydrogenase 1, large subunit	2.9072
b0975	hyaD	protein involved in processing of HyaA and HyaB proteins	2.47082
b0976	hyaE	protein involved in processing of HyaA and HyaB proteins	2.4884
b0977	hyaF	protein involved in nickel incorporation into hydrogenase-1 proteins	1.65788
b0980	appA	phosphoanhydride phosphorylase	1.56664
b1000	cbpA	curved DNA-binding protein, DnaJ homologue that functions as a co-chaperone of DnaK	1.38187
b1001	yccE	predicted protein	1.03701
b1003	yccJ	predicted protein	1.32309
b1051	msyB	multicopy suppressor of secY and secA	1.79551
b1058	yceO	predicted protein	1.12463
b1152	ymfP	hypothetical protein	2.54347
b1153	ymfQ	prohage e14 tail protein homolog	4.26713
b1154	stfP	e14 prophage; predicted protein	3.21966
b1163	ycgF	anti-repressor for YcgE, blue light-responsive; FAD-binding; has c-di-GMP phosphodiesterase-like EAL domain, but does not degrade c-di-GMP	2.28681
b1169	ycgH_1	hypothetical protein,putative ATP-binding component of a transport system	1.27
b1182	hlyE	hemolysin E	2.59071
b1188	ycgB	conserved protein	2.64124
b1233	ychJ	conserved protein, UPF0225 family	1.01523
b1257	yciE	predicted rubrerythrin/ferritin-like metal-binding protein	1.01537
b1258	yciF	predicted rubrerythrin/ferritin-like metal-binding protein	1.09303
b1347	ydaC	Rac prophage; predicted protein	1.44217
b1351	racC	Rac prophage; predicted protein	1.23046
b1455	yncH	conserved protein	1.91109
b1456	rhsE	RhsE protein in rhs element	1.00164
b1458	yncI	hypothetical protein	1.25257
b1470	yddJ	predicted protein	1.59805
b1471	yddK	putative glycoportein	1.85852
b1536	ydeI	conserved protein	1.97947
b1553	rzpQ	Rz-like equivalent, Qin prophage	1.05892
b1573	ydfC	conserved protein, Qin prophage	1.1133
b1576	ydfD	Qin prophage; predicted protein	1.44881
b1614	ydgA	conserved protein, DUF945 family	1.26395
b1668	ydhS	conserved protein with FAD/NAD(P)-binding domain	1.76152
b1679	sufE	sulfur acceptor protein	1.7282
b1681	sufD	FeS cluster assembly protein of SufBCD complex	1.85172
b1683	sufB	component of SufBCD complex	2.36909
b1684	sufA	Fe-S cluster assembly protein	2.2771
b1686	ydiI	acyl-CoA esterase in vitro	1.02738
b1687	ydiJ	predicted FAD-linked oxidoreductase	1.91948
b1707	ydiV	predicted cyclic-di-GMP phosphodiesterase	1.43127
b1724	ydiZ	predicted protein	1.69646
b1783	yeaG	protein kinase, function unknown; autokinase	2.66493
b1834	yebT	conserved protein	1.32377
b1836	yebV	predicted protein	2.40868
b1837	yebW	predicted protein	1.53188
b1862	yebB	conserved protein, DUF830 family	1.12003
b1933	yedN_2	hypothetical protein	1.20251
b1934	yedN_1	hypothetical protein	1.36381
b1935	yedM	hypothetical protein	2.57845
b1953	yodD	predicted protein	2.58589
b1957	yodC	predicted protein	1.94656
b1990	erfK	L,D-transpeptidase linking Lpp to murein	1.80239
b2080	yegP	conserved protein, UPF0339 family	2.13083
b2085	yegR	predicted protein	1.06513
b2112	yehE	predicted protein	1.38995
b2266	elaB	conserved protein	1.80671
b2302	yfcG	GSH-dependent disulfide bond oxidoreductase	1.37023
b2345	yfdF	predicted protein	1.02774
b2598	pheL	pheA gene leader peptide	1.195
b2625	yfjI	CP4-57 prophage; predicted protein	1.10013
b2649	ypjB	hypothetical protein	1.1752
b2650	ypjC	hypothetical protein	2.16287
b2665	ygaU	predicted protein	1.64837
b2671	ygaC	predicted protein	1.15728
b2672	ygaM	predicted protein	2.38744
b2849	yqeK	predicted protein	1.34406
b2850	ygeF	hypothetical protein	1.983
b2853	ygeI	predicted protein	1.43503
b2854	pbl	hypothetical protein,predicted peptidoglycan-binding enzyme	1.82713
b2857	ygeM	hypothetical protein	2.05572
b2858	ygeN	hypothetical protein	1.8935
b3000	yghX_2	hypothetical protein	1.2692
b3097	yqjC	conserved protein	1.59026
b3098	yqjD	conserved protein	1.25282
b3100	yqjK	conserved protein	1.58656
b3102	yqjG	predicted S-transferase	1.24643
b3121	yhaC	predicted protein	1.28334
b3239	yhcO	predicted barnase inhibitor	1.98777
b3336	bfr	bacterioferritin, iron storage and detoxification protein	1.4574
b3362	yhfG	predicted protein	1.1604
b3443	yrhA	hypothetical protein	1.51368
b3448	yhhA	conserved protein, DUF2756 family	1.05917
b3490	yhiL	hypothetical protein	1.12675
b3491	yhiM	inner membrane protein, DUF1323 family	1.17594
b4038	yjbI	hypothetical protein	1.17238
b4047	yjbL	predicted protein	1.30734
b4048	yjbM	predicted protein	1.69117
b4066	yjcF	conserved protein	1.0069
b4107	yjdN	conserved protein	1.744
b4126	yjdI	conserved protein	1.99261
b4181	yjfI	conserved protein, DUF2170 family	1.31397
b4215	ytfI	predicted protein	1.1697
b4252	tabA	biofilm modulator regulated by toxins	2.40772
b4253	yjgL	predicted protein	1.11882
b4376	osmY	periplasmic protein	1.25172
b4455	hokA	toxic polypeptide, small	1.40829

## Sheet: 10min-down
Blattner number	Gene name	Functional description	Log2 ratio
response to stress
b0311	betA	choline dehydrogenase, a flavoprotein	-4.69993
b0312	betB	betaine aldehyde dehydrogenase, NAD-dependent	-8.36581
b0314	betT	choline transporter of high affinity	-7.14288
b1308	pspE	thiosulfate:cyanide sulfurtransferase (rhodanese)	-1.71694
b1449	yncB	predicted NADP-dependent, Zn-dependent oxidoreductase	-1.05573
b1895	uspC	universal stress protein	-1.20925
b2259	pmrD	inactive two-component system connector protein	-1.10257
b4142	groS	Cpn10 chaperonin GroES, small subunit of GroESL	-1.29269
regulation
b0034	caiF	DNA-binding transcriptional activator	-1.86437
b0146	sfsA	predicted DNA-binding transcriptional regulator	-1.72032
b0272	yagI	CP4-6 prophage; predicted DNA-binding transcriptional regulator	-6.80304
b0282	yagP	predicted transcriptional regulator LYSR-type	-5.28259
b0294	matA	predicted regulator	-8.36786
b0305	ykgD	predicted DNA-binding transcriptional regulator	-6.09914
b0313	betI	DNA-binding transcriptional repressor	-7.87686
b0315	yahA	c-di-GMP-specific phosphodiesterase	-6.20504
b0316	yahB	predicted DNA-bindng transcriptional regulator	-6.54761
b0318	yahD	ankyrin repeat protein	-5.0579
b0330	prpR	propionate catabolism operon regulatory protein	-4.0348
b0338	cynR	transcriptional activator of cyn operon; autorepressor	-6.83099
b0346	mhpR	DNA-binding transcriptional activator, 3HPP-binding	-1.76593
b0610	rnk	regulator of nucleoside diphosphate kinase	-1.28326
b0852	rimK	ribosomal protein S6 modification protein	-2.15226
b1303	pspF	DNA-binding transcriptional activator	-2.58349
b1356	racR	Rac prophage; predicted DNA-binding transcriptional regulator	-1.09036
b1611	fumC	fumarate hydratase (fumarase C),aerobic Class II	-1.02894
b1826	mgrB	regulatory peptide for PhoPQ, feedback inhibition	-1.07425
b1827	kdgR	DNA-binding transcriptional regulator f kdgK, kdgT, eda	-2.11035
b1976	mtfA	anti-repressor for DgsA(Mlc)	-1.18226
b2125	yehT	predicted response regulator in two-component system withYehU	-1.0831
b2126	yehU	predicted sensory kinase in two-component system with YehT, inner membrane protein	-1.10782
b2869	ygeV	predicted DNA-binding transcriptional regulator	-1.62562
b3071	yqjI	predicted transcriptional regulator, PadR family	-1.22429
b3118	tdcA	DNA-binding transcriptional activator	-3.22175
b3674	yidF	predicted DNA-binding transcriptional regulator	-1.44149
b4003	zraS	sensory histidine kinase in two-component regulatory system with ZraR	-1.17403
b4089	rpiR	DNA-binding transcriptional repressor	-1.07304
transport and membrane
b0129	yadI	predicted PTS Enzyme IIA	-1.38428
b0260	mmuP	CP4-6 prophage; predicted S-methylmethionine transporter	-4.66799
b0262	afuC	CP4-6 prophage; predicted ferric transporter subunit	-6.23699
b0270	yagG	CP4-6 prophage; predicted sugar transporter	-7.04985
b0287	yagU	inner membrane protein, DUF1440 family	-7.90676
b0288	ykgJ	predicted ferredoxin	-4.30647
b0296	ykgM	rpmE (L31) paralog	-7.86704
b0301	ykgB	inner membrane protein, DUF417 family	-8.09715
b0307	ykgF	predicted electron transport protein with ferridoxin-like domai	-7.80814
b0310	ykgH	predicted inner membrane protein	-4.78478
b0328	yahN	inner membrane protein, LysE transporter family; overproduction confers sensitivity to L-homoserine	-9.1867
b0336	codB	cytosine transporter	-6.91084
b0353	mhpT	predicted 3-hydroxyphenylpropionic transporter	-1.17292
b0380	yaiZ	predicted inner membrane protein, DUF2754 family	-1.59822
b0850	ybjC	conserved protein, DUF1418 family	-2.89242
b1109	ndh	respiratory NADH dehydrogenase 2/cupric reductase	-1.05232
b1225	narH	nitrate reductase 1, beta (Fe-S) subunit	-1.01499
b1243	oppA	oligopeptide transporter subunit	-2.81843
b1244	oppB	oligopeptide transporter subunit	-1.55942
b1245	oppC	oligopeptide transporter subunit	-1.14137
b1246	oppD	oligopeptide transporter subunit	-1.02557
b1247	oppF	oligopeptide transporter subunit	-1.38349
b1846	yebE	inner membrane protein, DUF533 family	-1.17651
b1901	araF	L-arabinose transporter subunit	-1.42402
b1929	yedE	predicted inner membrane protein	-1.21626
b2150	mglB	methyl-galactoside transporter subunit	-1.46872
b2240	glpT	sn-glycerol-3-phosphate transporter	-2.49141
b2243	glpC	sn-glycerol-3-phosphate dehydrogenase (anaerobic), small subunit	-1.1193
b2708	gutQ	D-arabinose 5-phosphate isomerase	-1.00996
b2724	hycB	hydrogenase 3, Fe-S subunit	-1.4304
b2964	nupG	nucleoside transporter	-1.93599
b3110	yhaO	predicted transporter	-1.2223
b3116	tdcC	L-threonine/L-serine transporter	-5.44371
b3476	nikA	Nickel-binding, heme-binding periplasmic protein	-1.81887
b3528	dctA	C4-dicarboxylic acid, orotate and citrate transporter	-1.35284
b3573	ysaA	predicted hydrogenase, 4Fe-4S ferredoxin-type component	-1.89324
b4032	malG	maltose transporter subunit	-1.80637
b4033	malF	maltose transporter subunit	-2.26909
b4034	malE	maltose transporter subunit	-2.20683
b4035	malK	fused maltose transport subunit, ATP-binding component of ABC superfamily/regulatory protein	-2.56881
b4036	lamB	maltose outer membrane porin (maltoporin)	-3.23771
b4037	malM	maltose regulon periplasmic protein	-2.90687
b4120	melB	melibiose:sodium symporter	-1.78057
b4123	dcuB	C4-dicarboxylate antiporter	-1.12115
b4240	treB	fused trehalose(maltose)-specific PTS enzyme: IIB component/IIC component	-2.74293
b4290	fecB	KpLE2 phage-like element; iron-dicitrate transporter subunit	-1.04783
metabolism
b0030	rihC	ribonucleoside hydrolase 3	-1.63835
b0114	aceE	pyruvate dehydrogenase, decarboxylase component E1, thiamin-binding	-1.20115
b0238	gpt	guanine-hypoxanthine phosphoribosyltransferase	-1.32671
b0239	frsA	fermentation-respiration switch protein; PTS Enzyme IIA(Glc)-binding protein; pNP-butyrate esterase activity	-1.20875
b0242	proB	gamma-glutamate kinase	-1.37125
b0243	proA	gamma-glutamylphosphate reductase	-1.17492
b0261	mmuM	CP4-6 prophage; S-methylmethionine:homocysteine methyltransferase	-7.14562
b0268	yagE	CP4-6 prophage; predicted lyase/synthase	-8.26422
b0269	yagF	CP4-6 prophage; predicted dehydratase	-5.86703
b0271	yagH	CP4-6 prophage; predicted xylosidase/arabinosidase	-5.80265
b0273	argF	ornithine carbamoyltransferase 2, chain F; CP4-6 prophage	-6.08305
b0284	paoC	PaoABC aldehyde oxidoreductase, Moco-containing subunit	-4.46374
b0285	paoB	PaoABC aldehyde oxidoreductase, FAD-containing subunit	-5.26552
b0286	paoA	PaoABC aldehyde oxidoreductase, 2Fe-2S subunit	-5.38055
b0297	eaeH	ttaching and effacing protein homolog, pathogenesis factor	-7.25681
b0304	ykgC	predicted pyridine nucleotide-disulfide oxidoreductase	-5.61625
b0323	yahI	carbamate kinase-like protein	-5.12145
b0325	yahK	predicted oxidoreductase, Zn-dependent and NAD(P)-binding	-6.84376
b0331	prpB	2-methylisocitrate lyase	-3.41853
b0333	prpC	2-methylcitrate synthase	-3.40435
b0334	prpD	2-methylcitrate dehydratase	-6.33281
b0335	prpE	propionate--CoA ligase	-3.74357
b0337	codA	cytosine deaminase	-9.64645
b0339	cynT	carbonic anhydrase	-5.46489
b0350	mhpD	2-keto-4-pentenoate hydratase	-2.709
b0352	mhpE	4-hyroxy-2-oxovalerate/4-hydroxy-2-oxopentanoic acid aldolase, class I	-1.12118
b0369	hemB	5-aminolevulinate dehydratase (porphobilinogen synthase)	-1.40867
b0578	nfsB	dihydropteridine reductase, NAD(P)H-dependent, oxygen-insensitive	-1.79159
b0628	lipA	lipoate synthase	-1.14309
b0851	nfsA	nitroreductase A, NADPH-dependent, FMN-dependent	-2.51958
b1226	narJ	molybdenum-cofactor-assembly chaperone subunit (delta subunit) of nitrate reductase 1	-1.00248
b1277	ribA	GTP cyclohydrolase II	-1.06216
b1378	ydbK	fused predicted pyruvate-flavodoxin oxidoreductase: conserved protein/conserved protein/FeS binding protein	-1.1453
b1427	rimL	ribosomal-protein-L7/L12-serine acetyltransferase	-1.31921
b1461	pptA	4-oxalocrotonate tautomerase	-1.06415
b1498	ydeN	conserved protein	-1.04438
b1725	yniA	predicted phosphotransferase/kinase	-1.37307
b1738	chbB	N,N'-diacetylchitobiose-specific enzyme IIB component of PTS	-1.47467
b1757	ynjE	predicted thiosulfate sulfur transferase	-1.11884
b2018	hisL	his operon leader peptide	-1.38942
b2146	yeiT	Dihydropyrimidine dehydrogenase, NADH-dependent, subunit A	-1.53116
b2147	yeiA	Dihydropyrimidine dehydrogenase, NADH-dependent, subunit B	-1.35743
b2239	glpQ	periplasmic glycerophosphodiester phosphodiesterase	-1.81022
b2242	glpB	sn-glycerol-3-phosphate dehydrogenase (anaerobic), membrane anchor subunit	-1.29056
b2426	ucpA	predicted short-chain oxidoreductase	-1.45008
b2428	murQ	N-acetylmuramic acid 6-phosphate (MurNAc-6-P) etherase	-1.18568
b2532	trmJ	tRNA mC32/mU32 methyltransferase, SAM-dependent	-1.00677
b2838	lysA	diaminopimelate decarboxylase, PLP-binding	-3.57003
b2866	xdhA	xanthine dehydrogenase, molybdenum binding subunit	-2.02696
b2867	xdhB	xanthine dehydrogenase, FAD-binding subunit	-1.9426
b2868	xdhC	xanthine dehydrogenase, Fe-S binding subunit	-1.49487
b2870	ygeW	predicted carbamoyltransferase	-1.42474
b2871	ygeX	2,3-diaminopropionate ammonia-lyase	-1.66165
b2872	ygeY	predicted peptidase	-1.77245
b2873	hyuA	D-stereospecific phenylhydantoinase	-1.15445
b2878	ygfK	predicted oxidoreductase, Fe-S subunit	-2.81601
b2879	ssnA	predicted chlorohydrolase/aminohydrolase	-2.0531
b2881	xdhD	probable hypoxanthine oxidase, molybdopterin-binding/Fe-S binding	-1.72826
b2889	idi	isopentenyl diphosphate isomerase	-1.2367
b2990	hybG	hydrogenase 2 accessory protein	-1.1115
b2991	hybF	protein involved with the maturation of hydrogenases 1 and 2	-1.16593
b3111	tdcG	L-serine deaminase III	-5.11793
b3112	b3112	putative L-serine dehydratase	-5.45631
b3114	tdcE	pyruvate formate-lyase 4/2-ketobutyrate formate-lyase	-5.61566
b3115	tdcD	propionate kinase/acetate kinase C, anaerobic	-5.31364
b3117	tdcB	catabolic threonine dehydratase, PLP-dependent	-5.0911
b3403	pck	phosphoenolpyruvate carboxykinase	-1.04368
b3617	kbl	glycine C-acetyltransferase	-1.0014
b3665	ade	cryptic adenine deaminase	-2.17248
b3766	ilvL	ilvG operon leader peptide	-1.10304
b3807	cyaY	iron-dependent inhibitor of iron-sulfur cluster formation; frataxin; iron-binding and oxidizing protein	-1.16026
b3924	fpr	ferredoxin-NADP reductase	-1.245
b3926	glpK	glycerol kinase	-1.3433
b4055	aphA	acid phosphatase/phosphotransferase, class B, non-specific	-1.38713
b4079	fdhF	formate dehydrogenase-H, selenopolypeptide subunit	-1.11117
b4090	rpiB	ribose 5-phosphate isomerase B/allose 6-phosphate isomerase	-1.20416
b4119	melA	alpha-galactosidase, NAD(P)-binding	-1.19657
b4239	treC	trehalose-6-P hydrolase	-2.81427
b4334	yjiL	predicted ATPase, activator of (R)-hydroxyglutaryl-CoA dehydratase	-1.09516
DNA recombination and repair
b0267	yagA	CP4-6 prophage; predicted DNA-binding transcriptional regulator	-5.30959
b0278	yagL	CP4-6 prophage; DNA-binding protein	-4.72972
b0281	intF	CP4-6 prophage; predicted phage integrase	-7.84969
b0298	insE	IS3 transposase A	-1.33812
b0299	insF	IS3 transposase B	-1.5874
b4209	ytfE	iron-sulfur cluster repair protein RIC	-1.40256
others and function unknown
b0227	yafL	predicted lipoprotein and C40 family peptidase	-1.20405
b0228	yafM	conserved protein	-1.84677
b0229	fhiA	flagellar system protein, promoterless fragment	-1.20233
b0253	ykfA	CP4-6 prophage; predicted GTP-binding protein	-1.08085
b0255	insN-1	hypothetical protein，CP4-6 prophage; partial regulator of insertion element IS911A	-1.10536
b0263	afuB	putative transport system permease protein	-7.21645
b0266	yagB	CP4-6 prophage; hypothetical protein	-8.39243
b0276	yagJ	CP4-6 prophage; hypothetical protein	-5.60478
b0277	yagK	CP4-6 prophage; conserved protein	-5.15366
b0279	yagM	CP4-6 prophage; predicted protein	-6.75885
b0280	yagN	CP4-6 prophage; predicted protein	-8.51719
b0283	paoD	moco insertion factor for PaoABC aldehyde oxidoreductase	-7.43195
b0289	yagV	conserved protein	-6.06893
b0290	yagW	predicted receptor	-5.17344
b0291	yagX	predicted aromatic compound dioxygenase	-7.87267
b0292	matC	predicted protein	-4.77041
b0293	matB	cryptic Mat fimbrillin gene	-4.76953
b0295	ykgL	predicted protein	-5.45437
b0300	ykgA	predicted DNA-binding transcriptional regulator	-6.845
b0303	ykgI	predicted protein	-7.42284
b0306	ykgE	predicted oxidoreductase	-5.83214
b0308	ykgG	predicted transporter	-5.42393
b0309	b0309	hypothetical protein	-7.20577
b0317	yahC	predicted inner membrane protein	-5.07898
b0319	yahE	predicted protein	-4.27483
b0320	yahF	predicted acyl-CoA synthetase with NAD(P)-binding domain and succinyl-CoA synthetase domain	-5.71446
b0321	yahG	conserved protein	-4.24729
b0324	yahJ	predicted deaminase with metallo-dependent hydrolase domain	-5.72775
b0326	yahL	predicted protein	-5.08338
b0327	yahM	predicted protein	-5.43205
b0354	yaiL	predicted protein	-1.18288
b0559	ybcW	DLP12 prophage; predicted protein	-1.19298
b0762	ybhT	predicted protein	-1.4425
b0798	ybiA	conserved protein, DUF1768 family	-1.18523
b1164	ycgZ	connector protein for RcsB regulation of biofilm and acid-resistance	-1.35189
b1165	ymgA	connector protein for RcsB regulation of biofilm	-1.31068
b1166	ariR	connector protein for RcsB regulation of biofilm and acid-resistance	-1.16463
b1178	pliG	predicted protein	-1.18652
b1179	ycgL	conserved protein	-1.30573
b1180	ycgM	predicted isomerase/hydrolase	-1.16947
b1406	ydbC	predicted oxidoreductase, NAD(P)-binding	-1.69243
b1419	ydcA	predicted protein	-1.18917
b1426	ydcH	predicted protein	-1.90772
b1655	ydhO	predicted peptidase, C40 clan	-1.00462
b1674	ydhY	predicted 4Fe-4S ferridoxin-type protein	-1.08423
b1930	yedF	conserved protein, UPF0033 family	-1.29365
b2173	yeiR	predicted enzyme	-1.2296
b2237	inaA	conserved protein, acid-induced	-1.14314
b2875	yqeB	conserved protein with NAD(P)-binding Rossman fold	-1.95191
b2876	yqeC	conserved protein	-2.60222
b2880	ygfM	predicted oxidoreductase	-1.95638
b3087	ygjR	predicted NAD(P)-binding dehydrogenase	-1.56639
b3109	yhaM	hypothetical protein	-1.35499
b3113	tdcF	predicted L-PSP (mRNA) endoribonuclease	-5.26571
b3160	yhbW	predicted enzyme	-2.70689
b3570	bax	conserved protein	-1.00078
b3595	yibJ	hypothetical protein,predicted Rhs-family protein	-1.30508
b4217	ytfK	conserved protein, DUF1107 family	-1.98344
b4335	yjiM	predicted 2-hydroxyglutaryl-CoA dehydratase	-1.62907

## Sheet: 60min-up
Blattner number	Gene name	Functional description	Log2 ratio
response to stress
b0012	htgA	predicted DNA-binding transcriptional regulator	1.43
b0140	ecpD	predicted periplasmic pilin chaperone	1.05
b1304	pspA	phage shock protein PspA regulatory protein for phage-shock-protein operon	6.76
b1305	pspB	phage shock protein B DNA-binding transcriptional regulator of psp operon	4.47
b1307	pspD	peripheral inner membrane phage-shock	4.75
b1308	pspE	thiosulfate:cyanide sulfurtransferase (rhodanese)	1.68
b1379	hslJ	heat-inducible protein	1.03
b1500	b1500	hypothetical protein	1.04
b1532	marB	hypothetical protein	1.37
b2851	ygeG	predicted chaperone	1.78
b4050	pspG	phage shock protein G	1.22
b4409	blr	beta-lactam resistance membrane protein	1.41
regulation
b0535	fimZ	transcriptional regulator FimZ	1.6
b0566	envY	EnvY envelope protein; thermoregulation of porin biosynthesis	1.46
b0706	ybfD	conserved protein	1.45
b0900	ycaN	predicted DNA-binding transcriptional regulator	1.25
b0989	cspH	cold shock-like protein cspH cold shock-like protein stress protein, member of the CspA-family	1.46
b0990	cspG	cold shock protein CspG DNA-binding transcriptional regulator	1.36
b0993	torS	hybrid sensory histidine kinase in two-component regulatory system with TorR	1.04
b1040	csgD	DNA-binding transcriptional regulator CsgD	1.85
b1145	ymfK	e14 prophage; repressor protein phage e14	7.58
b1146	ymfT	e14 prophage; predicted DNA-binding transcriptional regulator	7.46
b1149	ymfN	e14 prophage; predicted DNA-binding transcriptional regulator	6.26
b1162	ycgE	putative transcriptional regulator YcgE	3.01
b1265	trpL	trp operon leader peptide	1.62
b1285	gmr	RNase II stability modulator	1.03
b1306	pspC	DNA-binding transcriptional activator PspC	4.78
b1320	ycjW	putative LACI-type transcriptional regulator	1.4
b1328	ycjZ	putative transcriptional regulator YcjZ	1.34
b1499	ydeO	transcriptional regulator YdeO	1.16
b1506	yneL	pseudo hypothetical protein	1.73
b1530	marR	DNA-binding transcriptional repressor MarR	1.16
b1557	cspB	cold shock-like protein cspB Qin prophage	1.78
b1558	cspF	cold shock-like protein cspF Qin prophage	1.6
b1559	quuQ	Qin prophage; predicted antitermination protein Q	1.32
b1608	rstA	DNA-binding transcriptional regulator RstA	1.24
b1658	purR	DNA-binding transcriptional repressor PurR	2.08
b1735	celD	DNA-binding transcriptional regulator ChbR	1.14
b1790	yeaM	putative transcriptional regulator YeaM,putative AraC-type regulatory protein	1.06
b1885	tap	methyl-accepting protein IV	1.23
b1888	cheA	chemotaxis protein CheA in two-component regulatory system with CheB and CheY	1.09
b1914	uvrY	regulator in two-component regulatory system with BarA	1.39
b1922	fliA	flagellar biosynthesis sigma factor RNA polySLRase, sigma 28 (sigma F) factor	1.08
b1951	rcsA	positive regulator for ctr capsule biosynthesis	1.06
b1987	cbl	transcriptional regulator Cbl	1.42
b2087	gatR	split galactitol utilization operon repressor	1.01
b2238	yfaHZ	putative transcriptional regulator	1.03
b2369	evgA	DNA-binding transcriptional activator EvgA	1.05
b2479	gcvR	glycine cleavage system transcriptional repressor	1.06
b2491	hyfR	putative 2-component regulator putative 2-component regulator	1.14
b2624	alpA	CP4-57 prophage; DNA-binding transcriptional activator	1.71
b2634	yfjR	CP4-57 prophage; predicted DNA-binding transcriptional regulator	1.56
b2635	yfjR	CP4-57 prophage; predicted DNA-binding transcriptional regulator	1.28
b2725	hycA	formate hydrogenlyase regulatory protein HycA	1.52
b2846	yqeH	conserved protein with bipartite regulator domain	1.42
b2847	yqeI	putative sensory transducer,predicted transcriptional regulator	2.28
b2852	ygeH	transcriptional regulator	1.94
b2855	ygeK	putative 2-component transcriptional regulator	2.01
b2856	ygeK	hypothetical protein	1.2
b3119	tdcR	DNA-binding transcriptional activator TdcR	1.96
b3219	yhcF	predicted transcriptional regulator	1.1
b3264	envR	DNA-binding transcriptional regulator EnvR	1.19
b3507	dctR	putative transcriptional regulator YhiF	1.64
b3512	gadE	hypothetical protein DNA-binding transcriptional activator	2.28
b3515	gadW	putative ARAC-type regulatory protein	1.18
b3516	gadX	DNA-binding transcriptional regulator GadX	1.4
b3684	yidP	putative transcriptional regulator	1.14
b3711	yidZ	DNA-binding transcriptional regulator YidZ	1.26
b3743	asnC	DNA-binding transcriptional regulator AsnC	4.64
b4102	phnF	predicted DNA-binding transcriptional regulator of phosphonate uptake and biodegradation	1.18
b4264	idnR	L-idonate regulatory protein DNA-binding transcriptional repressor, 5-gluconate-binding	1.24
b4300	sgcR	KpLE2 phage-like element; predicted DNA-binding transcriptional regulator	1.1
b1132	hflD	predicted lysogenization regulator	1.06
transport and membrane
b0041	fixA	putative electron transfer flavoprotein FixA	1.01
b0045	yaaU	putative transport protein metabolite transporter	1.89
b0139	htrE	predicted outer membrane usher protein	1.19
b0193	yaeF	hypothetical protein predicted lipoprotein	1.1
b0218	yafU	predicted inner membrane protein	1.13
b0427	yajR	putative transport protein p	1.02
b0468	ybaN	hypothetical protein conserved inner membrane protein	1.17
b0532	sfmD	putative outer membrane protein	1.05
b0572	cusC	copper/silver efflux system outer membrane protein CusC	1.02
b0583	entD	phosphopantetheinyltransferase component of enterobactin synthase multienzyme complex	1.25
b0587	fepE	ferric enterobactin transport protein FepE	1.38
b0612	citT	citrate:succinate antiporter	1.38
b0689	ybfP	predicted protein	1.2
b0718	ybgQ	predicted outer membrane protein	1.02
b0770	ybhI	putative membrane pump protein	1.48
b0856	potH	putrescine ABC transporter membrane protein	1.06
b0858	ybjO	predicted inner membrane protein	1.14
b0860	artJ	arginine transporter subunit	1.48
b0898	ycaD	MFS family transporte	1.18
b0978	appC	cytochrome bd-II oxidase subunit I	2.4
b0979	appB	cytochrome bd-II oxidase subunit II	2.05
b0984	gfcD	conserved protein	1.15
b0986	gfcB	predicted outer membrane lipoprotein	1.3
b0991	sfa	cold shock gene	1.3
b1016	efeU	putative cytochrome	1.37
b1017	efeU	putative cytochrome	1.29
b1037	csgG	curli production assembly/transport component csgG	1.08
b1038	csgF	curli assembly protein CsgF	1.55
b1039	csgE	curli assembly protein CsgE	1.79
b1057	yceJ	cytochrome	1.04
b1115	ycfT	predicted inner membrane protein	1.25
b1121	ycfZ	predicted inner membrane protein	1.45
b1122	ymfA	hypothetical protein predicted inner membrane protein	1.44
b1138	ymfE	e14 prophage; predicted inner membrane protein	6.09
b1139	lit	e14 prophage; cell death peptidase, inhibitor of T4 late gene expression	9.49
b1150	ymfR	e14 prophage; predicted protein	6.41
b1209	lolB	outer membrane lipoprotein LolB chaperone for lipoproteins	1.39
b1250	kch	voltage-gated potassium channel	1.27
b1296	puuP	putrescine importer	1.35
b1310	ycjN	predicted sugar transporter subunit	1
b1311	ycjO	putative binding-protein dependent transport	1.26
b1318	ycjV	putative ATP-binding component of a transport system ABC transporter	3.64
b1336	abgT	predicted cryptic aminobenzoyl-glutamate transporter	1.35
b1472	yddL	putaive outer membrane porin protein	1.49
b1473	yddG	predicted methyl viologen efflux pump	1.53
b1495	yddB	predicted porin protein	1.33
b1496	yddA	putative ATP-binding component of a transport system ABC transporter	1.25
b1505	ydeT	Outer membrane usher protein fimD	1.76
b1510	ydeK	predicted lipoprotein	1.22
b1520	yneE	conserved inner membrane protein	1
b1528	ydeA	sugar efflux transporter	1.09
b1534	ydeE	predicted transporter	1.26
b1585	ynfC	hypothetical protein	1.41
b1616	uidB	glucuronide transporter	1.12
b1626	ydgK	conserved inner membrane protein	1.13
b1627	rsxA	Na(+)-translocating NADH-quinone reductase subunit E	1.03
b1629	rsxC	electron transport complex protein RnfC	1.27
b1630	rnfD	electron transport complex protein RnfD	1.31
b1631	rsxG	electron transport complex protein RnfG	1.06
b1632	rsxE	predicted inner membrane NADH-quinone reductase SoxR-reducing system protein RsxE	1.53
b1660	ydhC	inner membrane transport protein YdhC	1.13
b1690	ydiM	putative transport system permease	1.99
b1700	ydiT	hypothetical protein ferredoxin-like protein ydiT	1.46
b1750	ydjX	predicted inner membrane protein	1.31
b1756	ynjD	putative ATP-binding component of a transport system	1.36
b1788	yoaI	hypothetical protein	1.34
b1801	yeaV	putative transporter	1.93
b1803	yeaX	predicted oxidoreductase	1.18
b1879	flhA	predicted flagellar export pore protein	1.01
b1980	yeeL	predicted transport protein	1.36
b2062	wza	putative polysaccharide export protein	1.12
b2106	rcnA	membrane protein conferring nickel and cobalt resistance	1.17
b2109	yehB	predicted outer membrane protein	1.05
b2123	yehR	hypothetical protein lipoprotein yehR	1.71
b2138	yohG	multidrug resistance outer membrane protein MdtQ	1.27
b2139	yohG	multidrug resistance outer membrane protein MdtQ	1.3
b2211	yojI	multidrug transporter membrane component	1.32
b2258	arnF	predicted inner membrane protein	1.05
b2313	cvpA	colicin V production protein membrane protein required for colicin V production	2.07
b2337	yfcT	putative outer membrane protein	1.03
b2351	yfdH	CPS-53 (KpLE1) prophage; bactoprenol glucosyl transferase	1.66
b2352	yfdI	CPS-53 (KpLE1) prophage; predicted inner membrane protein	1.6
b2368	emrK	multidrug resistance protein K	1.26
b2376	ypdI	predicted lipoprotein involved in colanic acid biosynthesis	1.42
b2393	nupC	nucleoside (except guanosine) transporter	1.19
b2406	xapB	xanthosine transporter	1.05
b2408	yfeN	conserved outer membrane protein	1.23
b2481	hyfA	hydrogenase 4 Fe-S subunit	1.17
b2488	hyfH	hydrogenase 4 subunit H	1.04
b2492	focB	putative formate transporter	1.19
b2497	uraA	uracil transporter	1.02
b2504	yfgG	hypothetical protein	1.61
b2534	yfhR	predicted peptidase putative hydrolase	1.43
b2611	ypjD	predicted inner membrane protein	1.52
b2639	ypjL	CP4-57 prophage; predicted inner membrane protein	1.19
b2686	emrB	multidrug efflux system protein	1.15
b2704	srlB	glucitol/sorbitol-specific PTS system component IIA	1.15
b2720	hycF	formate hydrogenlyase complex iron-sulfur subunit	1.22
b2724	hycB	formate hydrogenlyase subunit 2 hydrogenase 3	2.32
b2749	ygbE	conserved inner membrane protein	1.26
b2845	yqeG	putative transporter protein p	1.01
b2848	yqeJ	hypothetical protein	2.14
b2888	ygfU	putative permease	1.4
b2918	argK	membrane ATPase/protein kinase arginine/ornithine transport system ATPase	1.03
b2933	cmtA	mannitol (Cryptic)-specific IIBC component PTS system	1.02
b2971	yghG	predicted protein	1.01
b2975	glcA	glycolate transporter	1.29
b2987	pitB	inorganic phosphate transporter	1.07
b3005	exbD	biopolySLR transport protein ExbD	1.1
b3006	exbB	biopolySLR transport protein ExbB	1.2
b3014	yqhH	putative outer membrane lipoprotein	1.1
b3063	ygjE	predicted tartrate:succinate antiporter	1.03
b3086	ygjQ	redicted thioredoxin-like protein	1.19
b3090	ygjV	hypothetical protein conserved inner membrane protein	1.22
b3096	yqjB	hypothetical protein conserved protein	1.09
b3216	yhcD	predicted outer membrane protein	1.06
b3240	aaeB	p-hydroxybenzoic acid efflux system component	1.07
b3241	aaeA	p-hydroxybenzoic acid efflux system component	1.53
b3263	yhdU	putative transport protein	1.37
b3269	yhdX	putative transport system permease	1.12
b3270	yhdY	putative transport system permease	1.21
b3324	gspC	general secretory pathway component, cryptic general secretion pathway protein C	1.03
b3328	gspG	pseudopilin, cryptic, general secretion pathway	1.16
b3329	gspH	predicted general secretory pathway component	1.16
b3330	gspI	general secretory pathway component	1.67
b3331	yheI	predicted general secretory pathway component	1.32
b3332	gspK	general secretory pathway component	1.56
b3333	gspL	general secretory pathway component	1.21
b3334	gspM	general secretory pathway component	1.39
b3435	gntU	low affinity gluconate transporter	1.14
b3506	slp	Slp Outer membrane protein Slp precursor outer membrane protein induced after carbon starvation	1.16
b3508	yhiD	putative Mg(2+) transport ATPase	1.74
b3513	mdtE	multidrug resistance efflux protein MdtE	2.03
b3514	mdtF	putative transport system permease protein	1.53
b3577	yiaM	predicted transporter	1.08
b3654	yicE	putative transport protein	3.64
b3659	setC	predicted sugar efflux system	1.05
b3661	nlpA	cytoplasmic membrane lipoprotein-28	1.56
b3667	uhpC	membrane protein regulates uhpT expression	1.02
b3679	yidK	putative symporter YidK	1.09
b3683	glvC	arbutin sp ecific enzyme IIC component of PTS	1.42
b3696	yidXZ	predicted lipoproteinC	1.27
b3710	mdtL	multidrug efflux system protein MdtL	1.23
b3714	yieG	predicted inner membrane protein	1.74
b3716	cbrB	predicted inner membrane protein	1.57
b3899	frvB	putative PTS transporter components IIBC	1.15
b3900	frvA	putative fructose-like phosphotransferase system subunit EIIA	1.59
b3909	kdgT	2-keto-3-deoxygluconate permease	2.79
b3917	sbp	sulfate transporter subunit sulfate transporter subunit	1.37
b3950	frwB	predicted enzyme IIB component of PTS	1.39
b4029	yjbH	hypothetical protein lipoprotein yjbH precursor	1.04
b4081	yjcQ	predicted multidrug efflux system component	1.61
b4082	mdtN	multidrug resistance protein MdtN	1.1
b4087	alsA	fused D-allose transporter subunits of ABC superfamily: ATP-binding components D-allose transporter	1.05
b4088	alsB	D-allose transporter subunit	1.01
b4097	phnK	phosphonates transport ATP-binding protein	1.08
b4103	phnE	membrane channel protein component of Pn transporter	1.42
b4104	phnE	membrane channel protein component of Pn transporter	1.01
b4106	phnC	phosphonate/organophosphate ester transporter subunit	1.99
b4265	idnT	Gnt-II system L-idonate transporter	1.14
b4292	fecR	KpLE2 phage-like element; transmembrane signal transducer for ferric citrate transport	1.06
b4317	fimD	FimD Outer membrane usher protein fimD precursor	1.27
b4367	fhuF	ferric iron reductase involved in ferric hydroximate transport	1.56
b4400	creD	hypothetical protein inner membrane protein	1.13
b4415	hokE	hypothetical protein toxic polypeptide, small hypothetical protein	2.7
metabolism
b0002	thrA	bifunctional aspartokinase I	1.03
b0032	carA	carbamoyl phosphate synthase small subuni	1.36
b0037	caiC	predicted crotonobetaine CoA ligase:carnitine CoA ligase	1.04
b0075	leuL	leu operon leader peptide	1.24
b0103	coaE	dephospho-CoA kinase	1.01
b0120	speD	S-adenosylmethionine decarboxylase	1.11
b0142	folK	2-amino-4-hydroxy-6-hydroxymethyldihyropteridine pyrophosphokinase	1.28
b0147	yadP	2'-5' RNA ligase	1.16
b0404	acpH	conserved protein acyl carrier protein	1.04
b0439	lon	DNA-binding ATP-dependent protease La	3.91
b0509	glxR	tartronate semialdehyde reductase, NADH-dependent	1.03
b0516	allC	allantoate amidohydrolase	1.19
b0518	fdrA	membrane protein FdrA predicted acyl-CoA synthetase with NAD(P)-binding Rossmann-fold domain	1.33
b0522	purK	phosphoribosylaminoimidazole carboxylase ATPase subunit	3.14
b0523	purE	phosphoribosylaminoimidazole carboxylase catalytic subunit	3.73
b0529	folD	bifunctional 5,10-methylene-tetrahydrofolate dehydrogenase	1.03
b0530	sfmA	putative fimbrial-like protein	1.37
b0531	sfmC	putative chaperone putative chaperone pilin chaperone, periplasmic	1.6
b0533	sfmH	SfmH involved in fimbrial asembly predicted fimbrial-like adhesin protein	1.26
b0534	sfmF	putative fimbrial protein	1.37
b0555	arrD	DLP12 prophage; predicted lysozyme lysozyme from lambdoid	1.79
b0556	rzpD	putative Rz endopeptidase from lambdoid prophage DLP12	1.74
b0614	citX	2'-(5''-triphosphoribosyl)-3'-dephospho-CoA:apo-citrate lyase	1.25
b0616	citE	citrate lyase beta chain citrate lyase beta chain (acyl lyase subunit) citrate lyase	1.34
b0617	citD	citrate lyase subunit gamma citrate lyase	1.2
b0638	phpB	predicted alpha-ribazole-5'-P phosphatase PhpB	1.12
b0674	asnB	asparagine synthetase B	1.5
b0693	speF	ornithine decarboxylase isozyme	1.24
b0717	ybgP	predicted assembly protein	1.19
b0772	ybhC	putative pectinesterase	1.05
b0776	bioF	8-amino-7-oxononanoate synthase	1.01
b0778	bioD	dethiobiotin synthetase	1.52
b0841	ybjG	undecaprenyl pyrophosphate phosphatase	1.1
b0885	aat	leucyl/phenylalanyl-tRNA--protein transferase	1.19
b0908	aroA	3-phosphoshikimate 1-carboxyvinyltransferase 5-enolpyruvylshikimate-3-phosphate synthetase	1.47
b0943	ycbV	putative fimbrial-like protein	1.09
b0944	ycbF	predicted periplasmic pilini chaperone	2.27
b0945	pyrD	dihydroorotate dehydrogenase	1.59
b1028	ymdE	hypothetical protein	1.87
b1062	pyrC	dihydroorotase	1.56
b1079	flgH	flagellar basal body L-ring protein	1.2
b1080	flgI	flagellar basal body P-ring protein	1.39
b1081	flgJ	peptidoglycan hydrolase muramidase	1.16
b1131	purB	adenylosuccinate lyase	1.76
b1159	mcrA	e14 prophage; 5-methylcytosine-specific restriction endonuclease B	6.55
b1184	umuC	DNA polySLRase V subunit UmuC DNA polySLRase V, subunit C	1.38
b1193	mLtE	murein transglycosylase E lytic	1.27
b1198	dhaM	fused predicted dihydroxyacetone-specific PTS enzymes: HPr component/EI component	1.32
b1199	dhaL	dihydroxyacetone kinase ADP-binding subunit dihydroxyacetone kinase, C-terminal domain	1.46
b1200	dhaK	dihydroxyacetone kinase, N-terminal domain	1.67
b1204	pth	peptidyl-tRNA hydrolase	1.04
b1208	ispE	4-diphosphocytidyl-2-C-methyl-D-erythritol kinase	1.01
b1253	yciA	acyl-CoA thioester hydrolase	1.07
b1316	ycjT	hypothetical protein	1.02
b1317	ycjU	predicted beta-phosphoglucomutase	3
b1348	lar	restriction alleviation and modification protein Rac prophage; restriction alleviation protein	1.57
b1352	kilR	FtsZ inhibitor protein Rac prophage; inhibitor of ftsZ, killing protein	1.82
b1408	ynbA	putative enzyme	1.78
b1412	acpD	azoreductase NADH-azoreductase, FMN-dependent	1.88
b1501	ydeP	putative oxidoreductase	1.66
b1502	ydeQ	putative adhesin fimbrial-like protein ydeQ precursor	1.59
b1503	ydeR	putative fimbrial-like protein fimbrial-like protein ydeR precursor	1.43
b1504	ydeS	putative fimbrial-like protein fimbrial-like protein ydeS precursor predicted fimbrial-like adhesin protein putative fimbrial-like protein	1.83
b1519	tamZ	trans-aconitate 2-methyltransferase trans-aconitate methyltransferase trans-aconitate 2-methyltransferase	1.19
b1554	arrQ	Qin prophage; predicted lysozyme	1.15
b1575	dicB	division inhibition protein dicB Qin prophage; cell division inhibition protein	1.71
b1624	ydgJ	putative oxidoreductase	1.19
b1694	ydiF	fused predicted acetyl-CoA:acetoacetyl-CoA transferase: alpha subunit/beta subunit	1.71
b1701	fadK	short chain acyl-CoA synthetase short chain acyl-CoA synthetase, anaerobic short chain acyl-CoA synthetase	1.01
b1714	pheS	phenylalanyl-tRNA synthetase subunit alpha phenylalanine tRNA synthetase, alpha subunit	1.19
b1715	pheM	phenylalanyl-tRNA synthetase (pheST) operon leader peptide	1.95
b1734	chbF	cryptic phospho-beta-glucosidase, NAD(P)-binding	1.54
b1759	nudG	pyrimidine (deoxy)nucleoside triphosphate pyrophosphohydrolase	1
b1767	ansA	cytoplasmic asparaginase I cytoplasmic L-asparaginase I	1.08
b1800	yeaU	putative tartrate dehydrogenase	1.58
b1802	yeaW	predicted 2Fe-2S cluster-containing protein	1.19
b1812	pabB	para-aminobenzoate synthase component I	1.4
b1842	holE	DNA polySLRase III subunit theta DNA polySLRase III subunit theta DNA polySLRase III, theta subunit	1.1
b1843	yobB	hypothetical protein	1.09
b1849	purT	phosphoribosylglycinamide formyltransferase 2	3.49
b1850	eda	keto-hydroxyglutarate-aldolase/keto-deoxy-phosphogluconate aldolase	1.25
b1878	flhE	flagellar protein	1.25
b1884	cheR	chemotaxis methyltransferase CheR	1.11
b1890	motA	flagellar motor protein MotA flagellar motor protein MotA proton conductor component of flagella motor	1.04
b1924	fliD	flagellar capping protein flagellar filament capping protein	1.46
b1926	fliT	flagellar biosynthesis protein FliT	2.57
b1937	fliE	flagellar hook-basal body protein FliE flagellar basal-body component	1.51
b1938	fliF	flagellar MS-ring protein	1.05
b1939	fliG	flagellar motor switch protein	1.07
b1942	fliJ	flagellar biosynthesis chaperone	1
b1947	fliO	flagellar biosynthesis protein FliO	1.07
b2010	dacD	D-alanyl-D-alanine carboxypeptidase	1.07
b2018	hisL	his operon leader peptide	1.48
b2028	ugd	UDP-glucose 6-dehydrogenase	1.15
b2043	wcaM	predicted colanic acid biosynthesis protein	1.31
b2044	wcaL	putative colanic acid biosynthesis glycosyl transferase	1.65
b2045	wcaK	predicted pyruvyl transferase	1.5
b2047	wcaJ	putative UDP-glucose lipid carrier transferase	1.19
b2049	cpsB	mannose-1-phosphate guanylyltransferase	1.18
b2050	wcaI	glycosyl transferase	1.04
b2052	fcl	GDP-fucose synthetase chain A	1.09
b2055	wcaE	glycosyl transferase	1.3
b2057	wcaC	glycosyl transferase	1.14
b2058	wcaB	putative colanic acid biosynthesis acetyltransferase WcaB	1.09
b2059	wcaA	glycosyl transferase	1.2
b2060	wzc	protein-tyrosine kinase	1.09
b2066	udk	uridine kinase	1.17
b2086	yegS	lipid kinase	1.32
b2104	thiM	hydroxyethylthiazole kinase	1.21
b2110	yehC	fimbrial chaperone yehC precursor	1.2
b2221	atoD	acetyl-CoA:acetoacetyl-CoA transferase subunit alpha	1.41
b2222	atoA	acetate CoA-transferase beta subunit	1.19
b2260	menE	O-succinylbenzoic acid--CoA ligase	1.17
b2262	menB	naphthoate synthase	1.04
b2263	yfbB	acyl-CoA thioester hydrolase YfbB	3.08
b2264	menD	2-succinyl-6-hydroxy-2,4-cyclohexadiene-1-carboxylic acid synthase	2.77
b2268	elaC	ribonuclease	1.19
b2269	elaD	predicted enzyme	1.48
b2271	yfbL	predicted peptidase	1.26
b2312	purF	amidophosphoribosyltransferase	1.28
b2333	yfcP	predicted fimbrial-like adhesin protein	1.5
b2350	yfdG	CPS-53 (KpLE1) prophage; bactoprenol-linked glucose translocase (flippase)	1.66
b2358	yfdO	hypothetical protein pseudo	1.14
b2374	frc	formyl-coenzyme A transferase	1.41
b2385	ypdF	predicted peptidase	1.02
b2407	xapA	purine nucleoside phosphorylase II	1.16
b2421	cysM	cysteine synthase B cysteine synthase B (O-acetylserine sulfhydrolase B)	1.29
b2476	purC	phosphoribosylaminoimidazole-succinocarboxamide synthase	2.12
b2483	hyfC	hydrogenase 4 membrane subunit	1.42
b2484	hyfD	hydrogenase 4 subunit D	1.43
b2486	hyfF	hydrogenase 4 subunit F	1.09
b2499	purM	phosphoribosylaminoimidazole synthetase	4.13
b2500	purN	phosphoribosylglycinamide formyltransferase 1	2.31
b2557	purL	phosphoribosylformyl-glycineamide synthetase	3.1
b2647	ypjA	adhesin-like autotransporter	1.07
b2654	ygaQ	hypothetical protein	2.36
b2655	ygaR	hypothetical protein	2
b2656	ygaR	hypothetical protein	2.13
b2657	yqaC	hypothetical protein	1.73
b2658	yqaD	hypothetical protein	1.22
b2705	srlD	sorbitol-6-phosphate dehydrogenase	1.02
b2711	norW	nitric oxide reductase NADH:flavorubredoxin oxidoreductase	1.25
b2716	ascB	cryptic 6-phospho-beta-glucosidase	1.05
b2721	hycE	hydrogenase 3 large subunit formate hydrogenlyase subunit 5 precursor large subunit of hydrogenase 3	1.01
b2723	hycC	formate hydrogenlyase subunit 3 formate hydrogenlyase subunit 3 hydrogenase 3, membrane subunit	1.15
b2750	cysC	adenylylsulfate kinase adenosine 5'-phosphosulfate kinase adenylylsulfate kinase	1.36
b2765	sscR	putative 6-pyruvoyl tetrahydrobiopterin synthase	1.11
b2791	truC	tRNA pseudouridine synthase C	1.51
b2842	kduD	2-deoxy-D-gluconate 3-dehydrogenase 2-deoxy-D-gluconate 3-dehydrogenase	4.49
b2843	kduI	5-keto-4-deoxyuronate isoSLRase	4.95
b2859	ygeO	hypothetical protein	1.88
b2873	hyuAZ	dihydropyrimidinase	1.07
b2878	ygfK	putative selenate reductase subunit YgfK	1.46
b2887	ygfT	putative oxidoreductase Fe-S binding subunit	1.04
b2913	serA	D-3-phosphoglycerate dehydrogenase	1.4
b2920	scpC	putative coenzyme A transferase propionyl-CoA:succinate-CoA transferase	1.06
b2944	yggI	hypothetical protein conserved protein	1.37
b2965	speC	ornithine decarboxylase	1.21
b3047	yqiH	predicted periplasmic pilin chaperone	1.6
b3141	agaI	galactosamine-6-phosphate isoSLRase	1.22
b3143	yraI	putative chaperone putative chaperone predicted periplasmic pilin chaperone	1.08
b3212	gltB	glutamate synthase, large subunit	1.32
b3215	yhcA	predicted periplasmic chaperone protein	1.2
b3379	php	predicted hydrolase	1.08
b3437	gntK	gluconate kinase 1 gluconate kinase 2	1.1
b3526	kdgK	2-dehydro-3-deoxygluconokinase	2.49
b3531	yhjM	endo-1,4-D-glucanase	1.06
b3553	yiaE	2-hydroxyacid dehydrogenase 2-keto-D-gluconate reductase	1.05
b3597	yibH	hypothetical protein	1.45
b3633	kdtA	3-deoxy-D-manno-octulosonic-acid transferase	1.08
b3678	yidJ	putative sulfatase	1.13
b3690	yidS	predicted oxidoreductase with FAD/NAD(P)-binding domain	1.35
b3766	ilvL	ilvG operon leader peptide	1.18
b3862	yihG	putative endonuclease	1.27
b3879	yihR	predicted aldose-1-epiSLRase	1.16
b3882	yihU	putative dehydrogenase	1.04
b3902	rhaD	rhamnulose-1-phosphate aldolase	1.31
b3903	rhaA	L-rhamnose isoSLRase	1.41
b3904	rhaB	rhamnulokinase	1.13
b3941	metF	5,10-methylenetetrahydrofolate reductase	1.16
b4005	purD	phosphoribosylglycinamide synthetase phosphoribosylamine-glycine ligase	3.18
b4006	purH	cyclohydrolase/phosphoribosylaminoimidazolecarboxamide formyltransferase	3.55
b4014	aceB	malate synthas	2.32
b4015	aceA	isocitrate lyase	2.42
b4016	aceK	isocitrate dehydrogenase kinase/phosphatase	1.49
b4085	alsE	allulose-6-phosphate 3-epiSLRase	1.27
b4099	phnI	carbon-phosphorus lyase complex subunit	1.05
b4100	phnH	carbon-phosphorus lyase complex subunit	1.25
b4101	phnG	PhnG protein phosphonate metabolism carbon-phosphorus lyase complex subunit	1.19
b4198	sgaE	L-ribulose-5-phosphate 4-epiSLRase	1.14
b4244	pyrI	aspartate carbamoyltransferase regulatory subunit	1.36
b4245	pyrB	aspartate carbamoyltransferase catalytic subunit	1.82
b4246	pyrL	pyrBI operon leader peptide pyrBI operon leader peptid	2.76
b4254	argI	ornithine carbamoyltransferase subunit I	1.06
b4314	fimA	FimA major type 1 subunit fimbrin (pilin)	1.36
b4316	fimC	FimC chaperone protein fimC precursor periplasmic chaperone	1.91
b4318	fimF	FimF protein precursor fimbrial morphology	1.19
b4319	fimG	FimG protein precursor fimbrial morphology	1.74
DNA recombination and repair
b0021	insB	IS1 transposase InsAB'	1.03
b0537	intD	DLP12 prophage; predicted integrase	1.08
b1140	intE	e14 prophage; predicted integrase	6.02
b1141	xisE	e14 prophage; predicted excisionase	8.51
b1158	pinE	e14 prophage; site-specific DNA recombinase	3.58
b1183	umuD	DNA polySLRase V subunit UmuD DNA polySLRase V subunit	1.03
b1350	recE	exonuclease VIII	1.43
b1374	pinQ	putative DNA-invertase from lambdoid prophage Rac Qin prophage;	1.4
b1633	nth	endonuclease III endonuclease III DNA glycosylase and apyrimidinic (AP) lyase (endonuclease III)	1.73
b1913	uvrC	excinuclease ABC subunit C excinuclease UvrABC, endonuclease subunit	1.03
b1921	fliZ	protein FliZ protein FliZ predicted regulator of FliA activity	1.58
b2002	yeeS	putative radC-like protein yeeS putative radC-like protein yeeS putative radC-like protein	1.08
b2349	intS	CPS-53 (KpLE1) prophage	1.09
b2644	yfjY	CP4-57 prophage; predicted DNA repair protein	1.12
b3262	yhdJ	putative methyltransferase putative	1.38
b3811	xerC	site-specific tyrosine recombinase XerC	1.39
b4170	mutL	methyl-directed mismatch repair protein	1.05
b4313	fimE	tyrosine recombinase	1.4
others and function unknown
b0005	yaaX	hypothetical protein	1.07
b0013	yaaI	hypothetical protein	1.11
b0017	yi82_1	hypothetical protein	1.17
b0079	fruL	hypothetical protein	1.19
b0108	ppdD	putative major pilin subunit	1.25
b0117	yacH	hypothetical protein	1.18
b0195	yaeB	hypothetical protein	1.13
b0362	yaiF	predicted protein	1.82
b0370	ykiB	predicted protein	1.92
b0371	yaiT	predicted protein	1.27
b0392	ykiA	hypothetical protein	1.32
b0502	ylbG	hypothetical protein	1.02
b0539	exoD	putative exonuclease encoded by prophage	2.06
b0548	ninE	prophage protein NinE DLP12 prophage; conserved protein	2.06
b0554	essD	DLP12 prophage; predicted phage lysis protein	1.23
b0558	ybcV	hypothetical protein	1.47
b0562	ybcY	hypothetical protein	1.31
b0563	ylcE	hypothetical protein	2.03
b0645	ybeR	predicted protein	1.8
b0646	djlB	predicted chaperone	1.38
b0647	ybeT	hypothetical protein	1.69
b0691	ybfH	predicted protein	1.06
b0704	ybfC	hypothetical protein	1.23
b0716	ybgO	predicted fimbrial-like adhesin protein	1.21
b0833	yliE	hypothetical protein	1.53
b0980	appA	phosphoanhydride phosphorylase	1.77
b0985	ymcB	hypothetical protein	1.22
b1009	rutD	putative acetyltransferase	1.04
b1018	ycdO	hypothetical protein	1.63
b1043	csgC	putative autoagglutination protein	1.4
b1055	yceA	hypothetical protein	1.19
b1056	yceI	hypothetical protein	1.3
b1085	yceQ	hypothetical protein	1.26
b1112	ycfR	predicted protein hypothetical protein hypothetical protein	1.07
b1137	ymfD	e14 prophage; predicted SAM-dependent methyltransferase	8.79
b1142	ymfH	e14 prophage; predicted protein	6.85
b1143	ymfI	e14 prophage; predicted protein	8.78
b1144	ymfJ	e14 prophage; predicted protein	6.77
b1147	ymfL	e14 prophage; predicted DNA-binding transcriptional regulator	2.66
b1148	ymfM	e14 prophage; predicted protein	3.71
b1151	ymfO	predicted protein	7.35
b1152	ymfP	predicted protein	2.47
b1153	ymfQ	e14 prophage; conserved protein	4
b1154	ycfK	e14 prophage; predicted protein	3.98
b1155	ymfS	e14 prophage; predicted protein	6.73
b1156	tfaE	e14 prophage; predicted tail fiber assembly protein	6.83
b1157	stfE	predicted protein	5.4
b1163	ycgF	predicted FAD-binding phosphodiesterase	1.96
b1194	ycgR	hypothetical protein protein involved in flagellar function	1.19
b1220	ychO	predicted invasin	1.63
b1228	ychS	predicted protein	1.44
b1287	yciW	putative oxidoreductase	1.96
b1295	ymjA	hypothetical protein	1.08
b1346	ydaQ	Rac prophage; conserved protein	1.04
b1347	ydaC	Rac prophage; predicted protein	1.45
b1351	racC	Rac prophage; predicted protein	2.23
b1357	ydaS	Rac prophage; predicted DNA-binding transcriptional regulator	1.25
b1358	ydaT	Rac prophage; predicted protein	1.01
b1359	ydaU	Rac prophage; conserved protein	1.15
b1361	ydaW	predicted protein	1.1
b1362	rzpR	predicted protein	1.47
b1368	ynaA	predicted protein	1.31
b1371	lomR	predicted protein	1.05
b1372	stfR	Rac prophage; predicted tail fiber protein	1.22
b1373	tfaQ	Qin prophage; predicted tail fibre assembly protein Rac prophage	1.57
b1375	ydfK	hypothetical protein Qin prophage; predicted DNA-binding transcriptional regulator Rac prophager	1.66
b1382	ynbE	predicted lipoprotein	1.01
b1388	paaA	predicted multicomponent oxygenase/reductase subunit for phenylacetic acid degradation	1.46
b1389	paaB	predicted multicomponent oxygenase/reductase subunit for phenylacetic acid degradation	1
b1390	paaC	predicted multicomponent oxygenase/reductase subunit for phenylacetic acid degradation	1.35
b1425	b1425	hypothetical protein	1.33
b1437	b1437	hypothetical protein	1.1
b1446	ydc	hypothetical protein	1.09
b1454	yncGZ	putative transferase	1
b1455	yncHZ	hypothetical protein	1.11
b1456	rhsE	Rhs core protein ,hypothetical protein	1.59
b1470	yddJ	hypothetical protein	2
b1471	yddK	predicted protein	2.22
b1547	ydfN	Qin prophage; predicted side tail fibre assembly protein	1.17
b1551	ynfN	Qin prophage; predicted protein	1.04
b1553	ydfP	Qin prophage; conserved protein	1.35
b1555	ydfR	Qin prophage; predicted protein	1.18
b1556	essQ	Qin prophage; predicted S lysis protein	1.64
b1560	ydfU	Qin prophage; predicted protein	1.43
b1565	ydfV	Qin prophage; predicted protein	2.02
b1566	flxA	Qin prophage; predicted protein	1.22
b1573	rzpQ	hypothetical protein	1.14
b1576	ydfD	hypothetical protein	1.85
b1577	ydfE	predicted protein	1.87
b1579	intQ	predicted protein	1.69
b1671	ydhX	putative ferredoxin-like protein ydhX	1.07
b1686	ydiI	hypothetical protein	1.44
b1687	ydiJ	putative oxidase	2.25
b1689	ydiL	hypothetical protein	1.09
b1720	arpB	hypothetical protein	2.37
b1721	arpBZ	hypothetical protein	2.02
b1782	yeaF	putative scaffolding protein in the formation of a murein-synthesizing	1.15
b1877	yecT	hypothetical protein	2.02
b1904	yecR	hypothetical protein	1.09
b1934	yedN	predicted protein	1.11
b1935	yedM	conserved protein	1.05
b1973	yodA	hypothetical protein	1.07
b1978	yeeJ	adhesin	1.16
b1979	yeeL	hypothetical protein	1.02
b2003	yeeT	hypothetical protein	1.37
b2004	yeeU	hypothetical protein	1.08
b2005	yeeV	hypothetical protein	1.8
b2006	yeeW	hypothetical protein	1.18
b2072	yegK	predicted protein	1.39
b2112	yehE	hypothetical protein	1.12
b2115	yehH	predicted protein	1.32
b2116	yehH	predicted protein	1.41
b2117	yehH	predicted protein	1.1
b2118	yehI	conserved protein	1.71
b2121	yehP	hypothetical protein	1.27
b2228	yfaSZ	hypothetical protein	1.04
b2229	yfaT	hypothetical protein	1.48
b2272	yfbM	hypothetical protein	1.2
b2273	yfbN	predicted protein	1.24
b2325	yfcL	hypothetical protein	1.01
b2326	yfcM	putative transporting ATPase	1.15
b2334	yfcQ	predicted fimbrial-like adhesin protein	1.41
b2335	yfcR	predicted fimbrial-like adhesin protein	1.01
b2353	tfaS	predicted protein	1.02
b2355	yfdL	predicted protein	1.33
b2356	yfdM	predicted protein	1.21
b2357	yfdN	CPS-53 (KpLE1) prophage; predicted protein	1.31
b2361	yfdR	CPS-53 (KpLE1) prophage; conserved protein	1.14
b2362	yfdS	CPS-53 (KpLE1) prophage; predicted protein	1.72
b2363	yfdT	CPS-53 (KpLE1) prophage; predicted protein	1.43
b2373	oxc	putative oxalyl-CoA decarboxylase	1.07
b2375	cyfdXZ	hypothetical protein	1.01
b2443	yffL	CPZ-55 prophage; predicted protein	1.18
b2444	yffM	CPZ-55 prophage; predicted protein	1.61
b2449	yffR	CPZ-55 prophage; predicted protein	2.01
b2454	eutJ	EutJ ethanolamine utilization protein	1.23
b2456	cchB	ethanolamine utilization protein eutN	1.2
b2467	yffH	hypothetical protein predicted NUDIX hydrolase hypothetical protein	1.24
b2583	yfiP	hypothetical protein	1.18
b2598	pheL	pheA gene leader peptide	1.05
b2625	yfjI	CP4-57 prophage; predicted protein	1.13
b2629	yfjM	CP4-57 prophage; predicted protein	1.54
b2633	yfjQ	CP4-57 prophage; predicted protein	1.79
b2638	yfjU	predicted protein	1.39
b2645	yfjZ	CP4-57 prophage; antitoxin of the YpjF-YfjZ toxin-antitoxin system	1.69
b2646	ypjF	CP4-57 prophage; toxin of the YpjF-YfjZ toxin-antitoxin system	1.37
b2792	yqcC	hypothetical protein	1.93
b2826	ppdA	hypothetical protein	1.06
b2849	yqeK	hypothetical protein	2.04
b2850	ygeF	hypothetical protein	2.26
b2854	pbl	predicted protein	2.27
b2857	ygeM	hypothetical protein	1.95
b2858	ygeN	hypothetical protein	1.32
b2862	ygeP	hypothetical protein	1.07
b2863	ygeQ	hypothetical protein	1.23
b2940	yqgC	hypothetical protein	1.08
b2941	yqgD	hypothetical protein	1.53
b2969	yghE	predicted protein	1.06
b2970	yghF	predicted protein	1.34
b2981	yghO	hypothetical protein	1.48
b2999	yghX	hypothetical protein	1.66
b3000	yghXZ	hypothetical protein	1.28
b3004	b3004	hypothetical protein	1.14
b3016	ygiQ	hypothetical protein	1.07
b3042	yqiC	conserved protein	1.01
b3046	yqiG	predicted protein	1.38
b3079	ygjJ	hypothetical protein	1.19
b3120	yhaB	hypothetical protein	2
b3121	yhaC	hypothetical protein	1.87
b3220	yhcG	conserved protein	1.1
b3242	yhcR	hypothetical protein	1.34
b3254		hypothetical protein	1.22
b3443	yrhA	hypothetical protein	1.21
b3489	yhiK	predicted protein	1.38
b3490	yhiL	predicted protein	1.04
b3491	yhiM	hypothetical protein	1.69
b3504	yhiS	predicted protein	1.56
b3535	yhjR	hypothetical protein	1.05
b3536	bcsE	conserved protein putative protease	1.12
b3576	yiaL	conserved protein	1.26
b3717	cbrC	conserved protein	1.03
b3719	yieL	predicted xylanase	1.06
b3810	yigA	hypothetical protein	1.03
b3873	yihM	predicted sugar phosphate isoSLRase	1.04
b3920	yiiQ	hypothetical protein	1.22
b3975	b3975	hypothetical protein	1.82
b4011	yjaA	hypothetical protein	1.04
b4017	arpA	ankyrin repeat protein, function unknown	1.7
b4038	yjbI	predicted protein	1.04
b4107	phnB	hypothetical protein	1.06
b4183	yjfK	hypothetical protein	1.12
b4247	yjgG	hypothetical protein	1.35
b4252	yjgK	hypothetical protein	2.32
b4253	yjgL	predicted protein	1.52
b4286	yjhV	predicted protein	1.25
b4308	yjhR	predicted protein	1.04
b4309	yjhS	hypothetical protein	1.01
b4341	yjiS	conserved protein	1.12
b4347	symE	conserved protein	1.01

## Sheet: 60min-down
Blattner number	Gene name	Functional description	Log2 ratio
response to stress
b0312	betB	betaine aldehyde dehydrogenase, NAD-dependent	-10.42
b1380	ldhA	D-lactate dehydrogenase	-1.14
b2579	yfiD	autonomous glycyl radical cofactor GrcA,pyruvate formate lyase subunit	-1.77
b3942	katG	hydroperoxidase HPI(I)	-1.29
regultion
b0034	caiF	DNA-binding transcriptional activator CaiF	-1.77
b0113	pdhR	transcriptional regulator PdhR	-2.43
b0146	sfsA	sugar fermentation stimulation protein A	-1.02
b0162	cdaR	carbohydrate diacid transcriptional activator CdaR	-1.4
b0272	yagI	CP4-6 prophage; predicted DNA-binding transcriptional regulator	-6.1
b0282	yagP	putative LysR-like transcriptional regulator	-6.9
b0294	ykgK	putative regulator	-6.68
b0305	ykgD	putative ARAC-type regulatory protein	-6.47
b0313	betI	transcriptional regulator BetI	-9.52
b0315	yahA	predicted DNA-binding transcriptional regulator	-10.06
b0316	yahB	putative transcriptional regulator YahB	-5.93
b0318	yahD	putative transcription factor	-4.92
b0330	prpR	DNA-binding transcriptional activator	-5.57
b0338	cynR	DNA-binding transcriptional regulator CynR	-5.73
b1221	narL	transcriptional regulator NarL	-1.03
b1611	fumC	fumarate hydratase (fumarase C),aerobic Class II	-2.33
b1827	kdgR	transcriptional regulator kdgR	-2.85
b1916	sdiA	DNA-binding transcriptional activator SdiA	-1.02
b2193	narP	DNA-binding response regulator in two-component regulatory system with NarQ or NarX	-1.23
b2398	yfeC	predicted DNA-binding transcriptional regulator	-1.26
b2573	rpoE	RNA polySLRase sigma factor RpoE	-1.13
b2869	ygeV	putative sigma-54-dependent transcriptional regulator ygeV	-1.46
b3118	tdcA	DNA-binding transcriptional activator TdcA	-2.42
b3709	tnaB	tryptophan permease TnaB	-1.16
b3755	yieP	putative transcriptional regulator YieP	-1.23
b3868	glnG	nitrogen regulation protein NR(I)	-1.49
b4153	frdB	fumarate reductase iron-sulfur subunit	-1.74
transport and membrane
b0112	aroP	aromatic amino acid transporter	-1.29
b0129	yadI	putative PTS enzyme II B component	-1.08
b0260	mmuP	CP4-6 prophage; predicted S-methylmethionine transporter	-5
b0262	afuC	CP4-6 prophage; predicted ferric transporter subunit	-6.34
b0270	yagG	CP4-6 prophage; predicted sugar transporter	-7.38
b0287	yagU	conserved inner membrane protein	-8.09
b0288	ykgJ	putative ferredoxin	-4.54
b0296	×gE	50S ribosomal protein L31 type B	-6.19
b0301	ykgB	conserved inner membrane protein	-7.25
b0307	ykgF	putative electron transport protein ykgF	-7.72
b0310	ykgH	predicted inner membrane protein	-8.03
b0314	betT	choline transport protein BetT , choline transporter of high affinity	-12
b0336	codB	cytosine permease	-4.74
b0377	sbmA	transport protein	-1.05
b0411	tsx	nucleoside-specific channel-forming protein Tsx	-1.19
b0478	ybaL	putative cation:proton antiport protein	-1.23
b0621	dcuC	C4-dicarboxylate transporter DcuC	-1.35
b0679	nagE	N-acetyl glucosamine specific PTS system components IIABC	-2.08
b0791	ybhQ	predicted inner membrane protein	-1.11
b0809	glnQ	glutamine ABC transporter ATP-binding protein	-2.41
b0810	glnP	glutamine ABC transporter permease protein	-2.43
b0811	glnH	glutamine ABC transporter periplasmic protein	-1.49
b0850	ybjC	predicted inner membrane protein	-1.76
b0852	rimK	ribosomal protein S6 modification protein	-2.2
b0895	dmsB	anaerobic dimethyl sulfoxide reductase subunit B	-2.13
b1109	ndh	NADH dehydrogenase	-2.41
b1223	narK	nitrite extrusion protein	-2.42
b1224	narG	nitrate reductase 1, alpha subunit	-2.12
b1225	narH	nitrate reductase 1 beta subunit	-3.11
b1227	narI	nitrate reductase 1 gamma subunit	-3.01
b1243	oppA	oligopeptide transport periplasmic binding protein	-3.64
b1244	oppB	oligopeptide transporter permease	-2.38
b1245	oppC	oligopeptide transport system permease protein oppC	-2.31
b1246	oppD	oligopeptide transporter ATP-binding component	-2.13
b1247	oppF	oligopeptide transport ATP-binding protein oppF	-1.88
b1256	yciD	outer membrane protein W	-2.94
b1322	ycjF	conserved inner membrane protein	-1.23
b1440	ydcS	ABC transporter periplasmic-binding protein	-1.27
b1441	ydcT	putative ATP-binding component of a transport system	-1.26
b1514	lsrC	putative transport system permease protein	-1.05
b1599	mdtI	multidrug efflux system protein MdtI	-1.63
b1600	mdtJ	multidrug efflux system protein MdtJ	-2.38
b2093	gatB	galactitol-specific PTS system component IIB	-1.78
b2094	gatA	galactitol-specific PTS system component IIA	-1.28
b2203	napB	diheme cytochrome c550	-1.18
b2204	napH	quinol dehydrogenase membrane component	-1.4
b2205	napG	quinol dehydrogenase periplasmic component	-1.14
b2208	napF	ferredoxin-type protein, predicted role in electron transfer to periplasmic nitrate reductase (NapA)	-1.12
b2243	glpC	sn-glycerol-3-phosphate dehydrogenase subunit C	-2.41
b2680	ygaX	putative transport protein	-1.81
b2681	ygaY	putative transport protein	-1.07
b2895	fldB	flavodoxin FldB	-1.21
b2964	nupG	nucleoside permease nupG	-1.62
b2995	hybB	putative hydrogenase 2 b cytochrome subunit	-1.7
b3116	tdcC	threonine/serine transporter TdcC	-4.36
b3127	garP	putative transport protein	-1.95
b3496	yhiP	inner membrane transporter YhiP	-1.13
b3573	yiaI	putative electron transport protein ysaA	-1.06
b4032	malG	maltose transporter permease	-2.37
b4033	malF	maltose transporter membrane protein	-2.24
b4034	malE	maltose ABC transporter periplasmic protein	-2.11
b4035	malK	maltose/maltodextrin transporter ATP-binding protein	-2.41
b4036	lamB	maltose outer membrane porin (maltoporin)	-2.6
b4037	malM	maltose regulon periplasmic protein	-2
b4068	yjcH	conserved inner membrane protein involved in acetate transport	-1.14
b4071	nrfB	cytochrome c-type protein NrfB	-1.98
b4072	nrfC	NrfC protein,formate-dependent nitrite reductase; Fe-S centers	-1.65
b4073	nrfD	hypothetical protein ,formate-dependent nitrate reductase complex; transmembrane protein	-1.41
b4120	melB	melibiose:sodium symporter	-1.38
b4138	dcuA	anaerobic C4-dicarboxylate transporter	-1.33
b4154	frdA	fumarate reductase flavoprotein subunit	-1.38
b4240	treB	trehalose(maltose)-specific PTS system components IIBC	-3.95
b4288	fecD	KpLE2 phage-like element; iron-dicitrate transporter subunit	-1.13
b4289	fecC	KpLE2 phage-like element; iron-dicitrate transporter subunit	-1.29
b4290	fecB	KpLE2 phage-like element; iron-dicitrate transporter subunit	-1.72
b4291	fecA	KpLE2 phage-like element; ferric citrate outer membrane transporter	-2
metabolism
b4239	treC	trehalose-6-phosphate hydrolase	-3.6
b0030	rihC	ribonucleoside hydrolase RihC	-1.88
b0035	caiE	carnitine operon protein CaiE	-1.78
b0036	caiD	carnitinyl-CoA dehydratase	-1.65
b0114	aceE	pyruvate dehydrogenase subunit E1	-1.27
b0161	degP	serine endoprotease (protease Do), membrane-associated	-1.11
b0239	frsA	fermentation/respiration switch protein	-1.01
b0261	mmuM	CP4-6 prophage; S-methylmethionine:homocysteine methyltransferase	-7.12
b0268	yagE	CP4-6 prophage; predicted lyase/synthase	-6.09
b0269	yagF	CP4-6 prophage; predicted dehydratase	-4.66
b0271	yagH	CP4-6 prophage; predicted xylosidase/arabinosidase	-5.59
b0273	argF	CP4-6 prophage; ornithine carbamoyltransferase 2, chain F	-5.52
b0284	yagR	predicted oxidoreductase with molybdenum-binding domain	-7.2
b0285	yagS	predicted oxidoreductase with FAD-binding domain	-7.41
b0286	yagT	putative xanthine dehydrogenase iron-sulfur-binding subunit	-7.61
b0297	eaeH	putative adhesin	-4.78
b0304	ykgC	pyridine nucleotide-disulfide oxidoreductase	-7.23
b0311	betA	choline dehydrogenase, a flavoprotein	-8.08
b0323	yahI	predicted carbamate kinase-like protein	-4.71
b0325	yahK	predicted oxidoreductase, Zn-dependent and NAD(P)-binding	-10.05
b0328	yahN	putative cytochrome subunit of dehydrogenase	-7.4
b0331	prpB	2-methylisocitrate lyase	-1.22
b0333	prpC	methylcitrate synthase	-2.33
b0334	prpD	2-methylcitrate dehydratase	-2.78
b0335	prpE	predicted propionyl-CoA synthetase with ATPase domain	-3.55
b0337	codA	cytosine deaminase	-9.33
b0339	cynT	carbonic anhydrase	-3.89
b0350	mhpD	2-keto-4-pentenoate hydratase	-3.52
b0369	hemB	delta-aminolevulinic acid dehydratase	-1.44
b0473	htpG	heat shock protein,molecular chaperone HSP90 family	-1.28
b0578	nfsB	dihydropteridine reductase	-1.64
b0628	lipA	lipoyl synthase	-1.61
b0795	ybhG	predicted membrane fusion protein (MFP) component of efflux pump, membrane anchor	-1.02
b0851	nfsA	nitroreductase A	-1.36
b0896	dmsC	anaerobic dimethyl sulfoxide reductase chain C	-1.3
b1226	narJ	nitrate reductase 1 delta subunit	-3.12
b1444	ydcW	gamma-aminobutyraldehyde dehydrogenase	-1.08
b1498	ydeN	putative sulfatase ydeN precursor	-2.68
b1593	bioD/ynfK	putative dithiobiotin synthetase	-1.2
b1805	fadD	long-chain-fatty-acid--CoA ligase	-1.12
b2143	cdd	cytidine deaminase	-1.02
b2146	yeiT	putative oxidoreductase	-1.96
b2147	yeiA	dihydropyrimidine dehydrogenase	-2.07
b2206	napA	nitrate reductase	-1.69
b2207	napD	assembly protein for periplasmic nitrate reductase	-1.2
b2239	glpQ	glycerophosphodiester phosphodiesterase	-1.98
b2240	glpT	sn-glycerol-3-phosphate transporter	-2.35
b2242	glpB	anaerobic glycerol-3-phosphate dehydrogenase subunit B	-2.06
b2727	hypB	hydrogenase nickel incorporation protein HypB	-1.56
b2728	hypC	hydrogenase isoenzymes formation protein	-1.64
b2799	fucO	L-1,2-propanediol oxidoreductase	-1.61
b2957	ansB	L-asparaginase II	-2.91
b2993	hybD	hydrogenase 2 maturation endopeptidase	-1.24
b2994	hybC	hydrogenase 2 large subunit	-1.17
b2996	hybA	hydrogenase 2 protein HybA	-2.34
b2997	hybO	hydrogenase 2 small subunit	-2.06
b3092	uxaC	glucuronate isoSLRase	-1.64
b3111	tdcG	L-serine dehydratase 1	-2.04
b3112	tdcG	L-serine dehydratase 1	-2.37
b3114	tdcE	putative formate acetyltransferase 3	-3.59
b3115	tdcD	propionate/acetate kinase	-4.05
b3117	tdcB	threonine dehydratase	-4.49
b3125	garR	tartronate semialdehyde reductase	-2.34
b3126	garL	alpha-dehydro-beta-deoxy-D-glucarate aldolase	-2.32
b3366	nirD	nitrite reductase small subunit	-2.02
b3588	aldB	aldehyde dehydrogenase B (lactaldehyde dehydrogenase)	-1
b3618	htrL	hypothetical protein	-1.06
b3924	fpr	ferredoxin-NADP reductase	-1.87
b4021	pepE	peptidase E,(alpha)-aspartyl dipeptidase	-1
b4055	aphA	acid phosphatase/phosphotransferase	-1.15
b4069	acs	acetyl-CoA synthetase	-1.17
b4070	nrfA	cytochrome c nitrite reductase	-2.68
b4119	melA	alpha-galactosidase	-1.42
b4139	aspA	aspartate ammonia-lyase	-1.11
b4151	frdD	fumarate reductase subunit D	-1.53
b4152	frdC	fumarate reductase subunit C	-1.72
DNA recombination and repair
b0267	yagA	CP4-6 prophage; predicted DNA-binding transcriptional regulator	-3.97
b0278	yagL	CP4-6 prophage; DNA-binding protein	-5.08
b0281	intF	CP4-6 prophage; predicted phage integrase	-7.9
b0298	insE	IS3 element protein InsE	-1.1
b0299	insF	IS3 element protein InsF	-1.17
b2159	nfo	endonuclease IV with intrinsic 3'-5' exonuclease activity	-1.58
Others and function unknown
b0263	afuB	predicted protein	-5.4
b0266	yagB	predicted protein	-6.21
b0276	yagJ	CP4-6 prophage; predicted protein	-5.6
b0277	yagK	CP4-6 prophage; conserved protein	-5.79
b0279	yagM	CP4-6 prophage; predicted protein	-7.46
b0280	yagN	CP4-6 prophage; predicted protein	-8.68
b0283	yagQ	hypothetical protein	-8.17
b0289	yagV	hypothetical protein	-5.62
b0290	yagW	putative receptor	-5.56
b0291	yagX	hypothetical protein	-6.37
b0292	yagY	hypothetical protein	-5.02
b0293	yagZ	hypothetical protein	-4.8
b0295	ykgL	hypothetical protein	-5.28
b0300	ykgA	predicted protein	-6.69
b0303	ykgI	hypothetical protein	-7.59
b0306	ykgE	putative dehydrogenase subunit	-5.08
b0308	ykgG	hypothetical protein	-6.67
b0309		hypothetical protein	-7.35
b0317	yahC	hypothetical protein /// predicted inner membrane protein	-7.67
b0319	yahE	hypothetical protein	-4.87
b0320	yahF	putative oxidoreductase subunit	-5.1
b0321	yahG	hypothetical protein	-3.45
b0324	yahJ	predicted deaminase with metallo-dependent hydrolase domain	-4.96
b0326	yahL	hypothetical protein	-6.44
b0327	yahM	predicted protein	-5.24
b0354	yaiL	nucleoprotein/polynucleotide-associated enzyme	-1.58
b0559	ybcW	DLP12 prophage; predicted protein	-2.73
b0631	ybeD	hypothetical protein	-1.15
b0919	ycbJ	hypothetical protein	-1.4
b1164	ycgZ	hypothetical protein	-1.99
b1165	ymgA	predicted protein	-2.26
b1166	ariR	predicted protein	-2.97
b1167	ymgC	predicted protein	-2.91
b1321	ycjX	conserved protein with nucleoside triphosphate hydrolase domain	-1.3
b1426	ydcH	hypothetical protein	-2.15
b1983	yeeN	hypothetical protein	-1.46
b2160	yeiI	hypothetical protein	-1.75
b2343	yfcZ	hypothetical protein	-1.12
b2442	intZ	CPZ-55 prophage; predicted integrase	-1.56
b2729	hypD	hydrogenase isoenzyme formation protein hypD	-1.1
b2875	yqeB	putative synthase	-1.63
b2876	yqeC	hypothetical protein	-1.71
b3074	ygjH	hypothetical protein	-1.02
b3113	tdcF	predicted L-PSP (mRNA) endoribonuclease	-2.58
b3128	garD	putative hydrolase	-2.2
b3595	yibJ	rhsA core protein with extension	-1.21
b4002	zraP	zinc resistance protein	-1.11
b4188	yjfN	hypothetical protein	-1.67
b4335	yjiM	hypothetical protein /// predicted 2-hydroxyglutaryl-CoA dehydratase	-2.15
b4380	yjjI	hypothetical protein	-1.45
