# Supplementary material for: Global transcriptional analysis of Escherichia coli expressing IrrE, a regulator from Deinococcus radiodurans , in response to NaCl shock
Source: Royal Society of Chemistry journal article supplement (doi:10.1039/c5mb00080g), 2015-02-10
Supplement: c5mb00080g2.xlsx [file c5mb00080g2.xlsx]

## Sheet:  0 vs 10-up
Blattner number	Gene name	Functional description	Log2 ratio(no shock)	Log2 ratio(shock 10min)
response to stress
b1004	wrbA	NAD(P)H:quinone oxidoreductase	1.76	1.2294
b1304	pspA	regulatory protein for phage-shock-protein operon	1.82	1.68271
b1482	osmC	Lipoyl-dependent Cys-based peroxidase, hydroperoxide resistance; salt-shock inducible membrane protein; peroxiredoxin	1.83	1.78229
b1500	safA	Two component system connector membrane protein, EvgSA to PhoQP	1.46	1.91748
b1732	katE	hydroperoxidase HPII(III) (catalase)	1.2	1.97116
b1896	otsA	trehalose-6-phosphate synthase	1.74	2.48927
b1897	otsB	trehalose-6-phosphate phosphatase, biosynthetic	2.5	3.16556
b1967	hchA	Hsp31 molecular chaperone	1.87	1.82507
b2851	ygeG	predicted chaperone	1.55	1.50994
b3494	uspB	universal stress (ethanol tolerance) protein B	1.81	1.31878
b4045	yjbJ	conserved protein, UPF0337 family	1.57	1.38532
b4411	ecnB	entericidin B membrane lipoprotein	1.87	1.88955
regulation
b0435	bolA	stationary-phase morphogene, transcriptional repressor for mreB; also regulator for dacA, dacC, and ampC	1.88	1.38051
b0564	appY	DNA-binding global transcriptional activator; DLP12 prophage	2.01	2.18749
b0999	cbpM	modulator of CbpA co-chaperone	1.87	1.62014
b1217	chaB	cation transport regulator	1.26	1.55618
b1285	gmr	cyclic-di-GMP phosphodiesterase; csgD regulator; modulator of Rnase II stability	1.2	1.51472
b1499	ydeO	transcriptional activator for mdtEF	1.42	1.15307
b1552	cspI	Qin prophage; cold shock protein	1.83	1.77025
b1739	osmE	DNA-binding transcriptional activator	1.68	1.28176
b2015	yeeY	predicted DNA-binding transcriptional regulator	1.08	1.00289
b2369	evgA	DNA-binding response regulator in two-component regulatory system with EvgS	1.47	1.07845
b2370	evgS	hybrid sensory histidine kinase in two-component regulatory system with EvgA	1.01	1.30124
b2855	ygeK	predicted DNA-binding transcriptional regulator	1.35	1.25615
b3023	ygiV	transcriptional repressor for mcbR biofilm gene	1.04	1.22794
b3507	dctR	predicted DNA-binding ranscriptional regulator	1.62	1.63078
b3512	gadE	DNA-binding transcriptional activator	2.57	2.90369
b3515	gadW	transcriptional activator of gadA and gadBC in absence of GadX	1.36	1.60538
b3516	gadX	DNA-binding transcriptional dual regulator	2.53	2.13355
b3555	yiaG	predicted transcriptional regulator, HTH_CROC1 family	1.64	2.28069
b3743	asnC	DNA-binding transcriptional dual regulator	2.54	2.69669
b4017	arpA	ankyrin repeat protein	1.15	1.75075
b4299	yjhI	KpLE2 phage-like element; predicted DNA-binding transcriptional regulator	1.1	1.76838
transport and membrane
b0218	yafU	hypothetical protein,an inner membrane protein	1.13	1.19089
b0453	ybaY	outer membrane lipoprotein	1.59	1.19509
b0458	ylaC	inner membrane protein, DUF1449 family	1.16	1.4289
b0486	ybaT	predicted transporter	2.32	2.94104
b0974	hyaC	hydrogenase 1, b-type cytochrome subunit	2.69	3.34286
b0978	appC	cytochrome bd-II oxidase, subunit I	1.7	2.30677
b0979	appB	cytochrome bd-II oxidase, subunit II	1.62	2.32484
b1025	ycdT	diguanylate cyclase	1.24	1.50243
b1038	csgF	outer membrane protein involved in curlin assembly/transport	1.16	1.4532
b1039	csgE	curli production assembly/transport componen	1.28	1.29714
b1101	ptsG	fused glucose-specific PTS enzymes: IIB component/IIC component	1.83	1.94853
b1195	ymgE	predicted inner membrane protein	1.82	2.33215
b1440	ydcS	polyhydroxybutyrate (PHB) synthase, ABC transporter periplasmic binding protein homolog	1.29	1.56516
b1441	ydcT	predicted spermidine/putrescine transporter subunit	1.32	1.30938
b1469	narU	nitrate/nitrite transporter	1.2	1.84134
b1472	yddL	putative outer membrane porin protein	1.07	1.60042
b1492	gadC	predicted glutamate:gamma-aminobutyric acid antiporter	1.95	1.92078
b1660	ydhC	predicted transporter	1.46	2.14323
b1682	sufC	component of SufBCD complex, ATP-binding component of ABC superfamily	1.58	1.92356
b1726	yniB	predicted inner membrane protein	1.26	1.16001
b1795	yeaQ	conserved protein, UPF0410 family	2.32	2.2721
b1964	yedS_1	hypothetical protein	1.4	1.14284
b2130	yehY	predicted transporter subunit: membrane component of ABC superfamily	1.22	1.54274
b2131	osmF	predicted transporter subunit: periplasmic-binding component of ABC superfamily	1.18	1.55739
b2135	yohC	inner membrane protein, Yip1 family	1.31	1.67133
b2313	cvpA	membrane protein required for colicin V production	2.04	2.20082
b2704	srlB	glucitol/sorbitol-specific enzyme IIA component of PTS	1.93	2.134
b2924	mscS	mechanosensitive channel protein, small conductance	1.21	1.07152
b3006	exbB	membrane spanning protein in TonB-ExbB-ExbD complex	1.03	1.30011
b3099	yqjE	inner membrane protein, DUF1469 family	1.73	1.33558
b3103	yhaH	inner membrane protein, DUF805 family	1.22	1.17715
b3127	garP	predicted (D)-galactarate transporter	1.09	1.40012
b3506	slp	outer membrane lipoprotein	2.85	2.97572
b3508	yhiD	predicted Mg(2+) transport ATPase, inner membrane protein	1.05	1.30869
b3513	mdtE	multidrug resistance efflux transporter	1.07	1.617
b3522	yhjD	putative alternate lipid exporter, suppressor of msbA and KDO essentiality, inner membrane protein	1.36	1.63278
b3654	xanP	xanthine permease	2.1	2.32623
b3909	kdgT	2-keto-3-deoxy-D-gluconate transporter	3.65	3.96644
b4111	proP	proline/glycine betaine transporter	1.21	1.30714
b4149	blc	outer membrane lipoprotein (lipocalin), cell division and growth function	1.77	2.4669
b4296	yjhF	KpLE2 phage-like element; predicted transporter	1.25	1.74375
b4336	yjiN	zinc-type alcohol dehydrogenase-like protein	1.03	1.16347
metabolism
b0073	leuB	3-isopropylmalate dehydrogenase, NAD(+)-dependent	2.07	2.66279
b0074	leuA	2-isopropylmalate synthase	1.21	1.72903
b0186	ldcC	lysine decarboxylase 2, constitutive	1.12	1.54382
b0439	lon	DNA-binding ATP-dependent protease La	1.88	2.40562
b0485	ybaS	glutaminase	2.45	3.18514
b0523	purE	N5-carboxyaminoimidazole ribonucleotide mutase	2.37	2.47905
b0533	sfmH	predicted fimbrial-like adhesin protein	1.04	1.63743
b0674	asnB	asparagine synthetase B	1.59	2.05992
b0865	ybjP	lipoprotein	1.11	1.44674
b0897	ycaC	predicted hydrolase, isochorismatase family	1.78	1.87837
b1198	dhaM	fused predicted dihydroxyacetone-specific PTS enzymes: HPr component/EI component	1.03	1.35793
b1199	dhaL	dihydroxyacetone kinase, C-terminal domain	1.1	1.39146
b1352	kilR	Rac prophage; inhibitor of ftsZ, killing protein	1.22	1.19364
b1409	ynbB	predicted CDP-diglyceride synthase	1.68	1.5883
b1493	gadB	glutamate decarboxylase B, PLP-dependent	2.12	1.70907
b1661	cfa	cyclopropane fatty acyl phospholipid synthase (unsaturated-phospholipid methyltransferase)	1.36	1.29765
b1680	sufS	cysteine desulfurase, stimulated by SufE; selenocysteine lyase, PLP-dependent	1.23	1.57788
b1715	pheM	phenylalanyl-tRNA synthetase operon leader peptide	1.13	1.6927
b1800	dmlA	D-malate oxidase, NAD-dependent; probable tartrate dehydrogenase	1.98	1.50101
b1849	purT	phosphoribosylglycinamide formyltransferase 2	2.06	2.50258
b1927	amyA	cytoplasmic alpha-amylase	1.22	1.81062
b1955	yedP	predicted mannosyl-3-phosphoglycerate phosphatase	1.62	1.76561
b2032	wbbK	lipopolysaccharide biosynthesis protein	1.18	1.02097
b2033	wbbJ	predicted lipopolysaccharide biosynthesis O-acetyl transferase	1.35	1.04956
b2034	wbbI	d-Galf:alpha-d-Glc beta-1,6-galactofuranosyltransferase	1.08	1.10734
b2035	rfc	O-antigen polymerase	1.26	1.08854
b2036	glf	UDP-galactopyranose mutase, FAD/NAD(P)-binding	1.38	1.09623
b2037	rfbX	predicted polisoprenol-linked O-antigen transporter	1.3	1.25434
b2038	rfbC	dTDP-4-deoxyrhamnose-3,5-epimerase	1.31	1.06319
b2039	rfbA	glucose-1-phosphate thymidylyltransferase	1.18	1.02863
b2097	fbaB	fructose-bisphosphate aldolase class I	1.87	1.76814
b2137	yohF	predicted oxidoreductase with NAD(P)-binding Rossmann-fold domain	1.11	1.36432
b2269	elaD	protease, capable of cleaving an AMC-ubiquitin model substrate	1.01	1.31187
b2312	purF	amidophosphoribosyltransferase	1.55	1.86532
b2464	talA	transaldolase A	1.77	2.33002
b2465	tktB	transketolase 2, thiamin-binding	1.93	2.53798
b2476	purC	phosphoribosylaminoimidazole-succinocarboxamide synthetase	1.82	2.31098
b2499	purM	phosphoribosylaminoimidazole synthetase	2.22	3.04657
b2500	purN	phosphoribosylglycinamide formyltransferase 1	1.19	1.79576
b2551	glyA	serine hydroxymethyltransferase	1.29	1.32659
b2557	purL	phosphoribosylformyl-glycineamide synthetase	1.83	2.12309
b2599	pheA	fused chorismate mutase P/prephenate dehydratase	2.58	1.312
b2654	ygaQ_1	hypothetical protein	1.93	1.57226
b2656	ygaQ_2	hypothetical protein	1.41	1.87359
b2657	ygaQ_3	putative enzyme	1.06	1.43419
b2705	srlD	sorbitol-6-phosphate dehydrogenase	1.95	1.98569
b2842	kduD	2-deoxy-D-gluconate 3-dehydrogenase	3.88	4.19511
b2843	kduI	4-deoxy-L-threo-5-hexosulose-uronate ketol-isomerase	4.14	4.86548
b2913	serA	D-3-phosphoglycerate dehydrogenase	1.26	1.46072
b3012	dkgA	2,5-diketo-D-gluconate reductase A	1.19	1.77243
b3517	gadA	glutamate decarboxylase A, PLP-dependent	1.62	1.77206
b3526	kdgK	ketodeoxygluconokinase	2.04	2.35702
b4005	purD	phosphoribosylglycinamide synthetase phosphoribosylamine-glycine ligase	2.55	2.50758
b4006	purH	fused IMP cyclohydrolase/phosphoribosylaminoimidazolecarboxamide formyltransferase	2	2.35564
b4014	aceB	malate synthase A	1.47	3.02711
b4015	aceA	isocitrate lyase	1.2	2.9912
b4127	yjdJ	predicted acyltransferase with acyl-CoA N-acyltransferase domain	1.61	1.88588
b4187	aidB	isovaleryl CoA dehydrogenase	1.31	1.574
b4245	pyrB	aspartate carbamoyltransferase, catalytic subunit	1.01	1.19201
b4246	pyrL	pyrBI operon leader peptide	1.39	1.41703
b4297	yjhG	KpLE2 phage-like element; predicted dehydratase	1.21	2.03923
b4298	yjhH	KpLE2 phage-like element; predicted lyase/synthase	1.4	2.20536
b4314	fimA	major type 1 subunit fimbrin (pilin)	1.47	1.0261
DNA recombination and repair
b1345	intR	Rac prophage; integrase	1.11	1.04578
b1459	yncM	hypothetical protein	1.1	1.62959
others and function unknown
b0363	yaiP	predicted glucosyltransferase	1.34	1.41875
b0370	ykiB	hypothetical protein	2.3	1.77734
b0384	psiF	conserved protein, PsiF family, pho regulon	1.82	1.97357
b0499	ylbH	hypothetical protein	1.26	1.46121
b0500	ybbD	hypothetical protein	1.69	1.90534
b0510	ybbV	hypothetical protein	1.57	1.78209
b0690	ybfG	hypothetical protein	1.09	1.10037
b0707	ybgA	conserved protein, DUF1722 family	1.62	2.08558
b0790	ybhP	conserved protein, endo/exonuclease/phosphatase family PFAM PF03372	1.26	1.37269
b0803	ybiI	DksA-type zinc finger protein, function unknown	1.72	1.63227
b0839	dacC	D-alanyl-D-alanine carboxypeptidase (penicillin-binding protein 6a)	1	1.31865
b0871	poxB	pyruvate dehydrogenase (pyruvate oxidase), thiamin-dependent, FAD-binding	1.19	1.80532
b0972	hyaA	hydrogenase 1, small subunit	2.85	3.43363
b0973	hyaB	hydrogenase 1, large subunit	2.27	2.9072
b0975	hyaD	protein involved in processing of HyaA and HyaB proteins	2.09	2.47082
b0976	hyaE	protein involved in processing of HyaA and HyaB proteins	1.69	2.4884
b0977	hyaF	protein involved in nickel incorporation into hydrogenase-1 proteins	1.47	1.65788
b0980	appA	phosphoanhydride phosphorylase	1.06	1.56664
b1000	cbpA	curved DNA-binding protein, DnaJ homologue that functions as a co-chaperone of DnaK	1.47	1.38187
b1001	yccE	predicted protein	1.77	1.03701
b1003	yccJ	predicted protein	1.72	1.32309
b1051	msyB	multicopy suppressor of secY and secA	1.71	1.79551
b1152	ymfP	hypothetical protein	4.48	2.54347
b1153	ymfQ	prohage e14 tail protein homolog	6.89	4.26713
b1154	stfP	e14 prophage; predicted protein	7.02	3.21966
b1182	hlyE	hemolysin E	2.09	2.59071
b1188	ycgB	conserved protein	2.21	2.64124
b1233	ychJ	conserved protein, UPF0225 family	1.15	1.01523
b1347	ydaC	Rac prophage; predicted protein	1.26	1.44217
b1351	racC	Rac prophage; predicted protein	1.1	1.23046
b1455	yncH	conserved protein	1.68	1.91109
b1470	yddJ	predicted protein	1.44	1.59805
b1471	yddK	putative glycoportein	2.16	1.85852
b1536	ydeI	conserved protein	1.51	1.97947
b1576	ydfD	Qin prophage; predicted protein	1.13	1.44881
b1614	ydgA	conserved protein, DUF945 family	1.38	1.26395
b1668	ydhS	conserved protein with FAD/NAD(P)-binding domain	1.38	1.76152
b1679	sufE	sulfur acceptor protein	1.39	1.7282
b1681	sufD	FeS cluster assembly protein of SufBCD complex	1.04	1.85172
b1683	sufB	component of SufBCD complex	1.7	2.36909
b1684	sufA	Fe-S cluster assembly protein	2.08	2.2771
b1687	ydiJ	predicted FAD-linked oxidoreductase	1.05	1.91948
b1707	ydiV	predicted cyclic-di-GMP phosphodiesterase	1.51	1.43127
b1724	ydiZ	predicted protein	1.43	1.69646
b1783	yeaG	protein kinase, function unknown; autokinase	2.13	2.66493
b1836	yebV	predicted protein	2.12	2.40868
b1837	yebW	predicted protein	1.77	1.53188
b1933	yedN_2	hypothetical protein	1.29	1.20251
b1934	yedN_1	hypothetical protein	1.07	1.36381
b1935	yedM	hypothetical protein	2.04	2.57845
b1953	yodD	predicted protein	2.62	2.58589
b1957	yodC	predicted protein	1.93	1.94656
b1990	erfK	L,D-transpeptidase linking Lpp to murein	1.55	1.80239
b2080	yegP	conserved protein, UPF0339 family	2.09	2.13083
b2112	yehE	predicted protein	1.24	1.38995
b2266	elaB	conserved protein	1.53	1.80671
b2302	yfcG	GSH-dependent disulfide bond oxidoreductase	1.02	1.37023
b2598	pheL	pheA gene leader peptide	1.95	1.195
b2649	ypjB	hypothetical protein	1.3	1.1752
b2672	ygaM	predicted protein	2.7	2.38744
b2849	yqeK	predicted protein	1.15	1.34406
b2850	ygeF	hypothetical protein	1.52	1.983
b2853	ygeI	predicted protein	1.77	1.43503
b2854	pbl	hypothetical protein,predicted peptidoglycan-binding enzyme	1.62	1.82713
b2857	ygeM	hypothetical protein	1.67	2.05572
b2858	ygeN	hypothetical protein	1.22	1.8935
b3097	yqjC	conserved protein	1.75	1.59026
b3098	yqjD	conserved protein	1.44	1.25282
b3100	yqjK	conserved protein	1.66	1.58656
b3102	yqjG	predicted S-transferase	1.2	1.24643
b3239	yhcO	predicted barnase inhibitor	1.74	1.98777
b3336	bfr	bacterioferritin, iron storage and detoxification protein	1.44	1.4574
b3362	yhfG	predicted protein	1.28	1.1604
b3443	yrhA	hypothetical protein	1.31	1.51368
b3448	yhhA	conserved protein, DUF2756 family	1.25	1.05917
b4038	yjbI	hypothetical protein	1.03	1.17238
b4047	yjbL	predicted protein	2.92	1.30734
b4048	yjbM	predicted protein	1.16	1.69117
b4066	yjcF	conserved protein	1.31	1.0069
b4107	yjdN	conserved protein	1.21	1.744
b4126	yjdI	conserved protein	1.98	1.99261
b4252	tabA	biofilm modulator regulated by toxins	2.52	2.40772
b4376	osmY	periplasmic protein	1.2	1.25172
b4455	hokA	toxic polypeptide, small	1.02	1.40829

## Sheet:  0 vs 10-down
Blattner number	Gene name	Functional description	Log2 ratio(no shock)	Log2 ratio(shock 10min)
response to stress
b0311	betA	choline dehydrogenase, a flavoprotein	-5.66	-4.69993
b0312	betB	betaine aldehyde dehydrogenase, NAD-dependent	-8.31	-8.36581
b0314	betT	choline transporter of high affinity	-9.43	-7.14288
regulation
b0272	yagI	CP4-6 prophage; predicted DNA-binding transcriptional regulator	-6.82	-6.80304
b0282	yagP	predicted transcriptional regulator LYSR-type	-9.08	-5.28259
b0294	matA	predicted regulator	-9.28	-8.36786
b0305	ykgD	predicted DNA-binding transcriptional regulator	-7.26	-6.09914
b0313	betI	DNA-binding transcriptional repressor	-7.28	-7.87686
b0315	yahA	c-di-GMP-specific phosphodiesterase	-9.32	-6.20504
b0316	yahB	predicted DNA-bindng transcriptional regulator	-8.55	-6.54761
b0318	yahD	ankyrin repeat protein	-6.88	-5.0579
b0330	prpR	propionate catabolism operon regulatory protein	-4.95	-4.0348
b0338	cynR	transcriptional activator of cyn operon; autorepressor	-7.2	-6.83099
b0346	mhpR	DNA-binding transcriptional activator, 3HPP-binding	-1.81	-1.76593
b0852	rimK	ribosomal protein S6 modification protein	-1.53	-2.15226
b1303	pspF	DNA-binding transcriptional activator	-1.64	-2.58349
b1827	kdgR	DNA-binding transcriptional regulator f kdgK, kdgT, eda	-1.44	-2.11035
b2125	yehT	predicted response regulator in two-component system withYehU	-1.07	-1.0831
b3118	tdcA	DNA-binding transcriptional activator	-2.76	-3.22175
transport and membrane
b0260	mmuP	CP4-6 prophage; predicted S-methylmethionine transporter	-6.05	-4.66799
b0262	afuC	CP4-6 prophage; predicted ferric transporter subunit	-6	-6.23699
b0270	yagG	CP4-6 prophage; predicted sugar transporter	-8.8	-7.04985
b0287	yagU	inner membrane protein, DUF1440 family	-9.15	-7.90676
b0288	ykgJ	predicted ferredoxin	-5.7	-4.30647
b0301	ykgB	inner membrane protein, DUF417 family	-8.15	-8.09715
b0307	ykgF	predicted electron transport protein with ferridoxin-like domai	-7.69	-7.80814
b0310	ykgH	predicted inner membrane protein	-7.57	-4.78478
b0328	yahN	inner membrane protein, LysE transporter family; overproduction confers sensitivity to L-homoserine	-8.06	-9.1867
b0336	codB	cytosine transporter	-8.34	-6.91084
b0353	mhpT	predicted 3-hydroxyphenylpropionic transporter	-1.09	-1.17292
b0850	ybjC	conserved protein, DUF1418 family	-2.11	-2.89242
b1243	oppA	oligopeptide transporter subunit	-2.56	-2.81843
b1244	oppB	oligopeptide transporter subunit	-1.54	-1.55942
b1245	oppC	oligopeptide transporter subunit	-1.23	-1.14137
b1246	oppD	oligopeptide transporter subunit	-1.27	-1.02557
b1247	oppF	oligopeptide transporter subunit	-1.25	-1.38349
b2150	mglB	methyl-galactoside transporter subunit	-1.17	-1.46872
b2240	glpT	sn-glycerol-3-phosphate transporter	-1.26	-2.49141
b2964	nupG	nucleoside transporter	-1.53	-1.93599
b3116	tdcC	L-threonine/L-serine transporter	-4.49	-5.44371
b3476	nikA	Nickel-binding, heme-binding periplasmic protein	-1.81	-1.81887
b3528	dctA	C4-dicarboxylic acid, orotate and citrate transporter	-1	-1.35284
b3573	ysaA	predicted hydrogenase, 4Fe-4S ferredoxin-type component	-1.18	-1.89324
b4032	malG	maltose transporter subunit	-1.19	-1.80637
b4033	malF	maltose transporter subunit	-1.36	-2.26909
b4034	malE	maltose transporter subunit	-1.25	-2.20683
b4035	malK	fused maltose transport subunit, ATP-binding component of ABC superfamily/regulatory protein	-1.62	-2.56881
b4036	lamB	maltose outer membrane porin (maltoporin)	-2.02	-3.23771
b4037	malM	maltose regulon periplasmic protein	-1.81	-2.90687
b4240	treB	fused trehalose(maltose)-specific PTS enzyme: IIB component/IIC component	-2.19	-2.74293
metabolism
b0114	aceE	pyruvate dehydrogenase, decarboxylase component E1, thiamin-binding	-1.37	-1.20115
b0261	mmuM	CP4-6 prophage; S-methylmethionine:homocysteine methyltransferase	-7.38	-7.14562
b0268	yagE	CP4-6 prophage; predicted lyase/synthase	-8.84	-8.26422
b0269	yagF	CP4-6 prophage; predicted dehydratase	-5.15	-5.86703
b0271	yagH	CP4-6 prophage; predicted xylosidase/arabinosidase	-6.01	-5.80265
b0273	argF	ornithine carbamoyltransferase 2, chain F; CP4-6 prophage	-7.34	-6.08305
b0297	eaeH	ttaching and effacing protein homolog, pathogenesis factor	-7.02	-7.25681
b0304	ykgC	predicted pyridine nucleotide-disulfide oxidoreductase	-6.31	-5.61625
b0323	yahI	carbamate kinase-like protein	-5.76	-5.12145
b0325	yahK	predicted oxidoreductase, Zn-dependent and NAD(P)-binding	-6.98	-6.84376
b0331	prpB	2-methylisocitrate lyase	-4.2	-3.41853
b0333	prpC	2-methylcitrate synthase	-3.84	-3.40435
b0335	prpE	propionate--CoA ligase	-5.87	-3.74357
b0337	codA	cytosine deaminase	-7.64	-9.64645
b0339	cynT	carbonic anhydrase	-7.64	-5.46489
b0350	mhpD	2-keto-4-pentenoate hydratase	-4.35	-2.709
b0578	nfsB	dihydropteridine reductase, NAD(P)H-dependent, oxygen-insensitive	-1.37	-1.79159
b0851	nfsA	nitroreductase A, NADPH-dependent, FMN-dependent	-1.95	-2.51958
b2878	ygfK	predicted oxidoreductase, Fe-S subunit	-1.03	-2.81601
b2889	idi	isopentenyl diphosphate isomerase	-1.12	-1.2367
b3111	tdcG	L-serine deaminase III	-4.28	-5.11793
b3112	b3112	putative L-serine dehydratase	-4.27	-5.45631
b3114	tdcE	pyruvate formate-lyase 4/2-ketobutyrate formate-lyase	-4.53	-5.61566
b3115	tdcD	propionate kinase/acetate kinase C, anaerobic	-4.25	-5.31364
b3117	tdcB	catabolic threonine dehydratase, PLP-dependent	-4.27	-5.0911
b3665	ade	cryptic adenine deaminase	-1.19	-2.17248
b3924	fpr	ferredoxin-NADP reductase	-1.12	-1.245
b4239	treC	trehalose-6-P hydrolase	-2.37	-2.81427
DNA recombination and repair
b0267	yagA	CP4-6 prophage; predicted DNA-binding transcriptional regulator	-6.83	-5.30959
b0278	yagL	CP4-6 prophage; DNA-binding protein	-5.86	-4.72972
b0281	intF	CP4-6 prophage; predicted phage integrase	-9.13	-7.84969
b0299	insF	IS3 transposase B	-1.18	-1.5874
others and function unknown
b0228	yafM	conserved protein	-1.21	-1.84677
b0263	afuB	putative transport system permease protein	-6.4	-7.21645
b0266	yagB	CP4-6 prophage; hypothetical protein	-7.67	-8.39243
b0276	yagJ	CP4-6 prophage; hypothetical protein	-6.05	-5.60478
b0277	yagK	CP4-6 prophage; conserved protein	-5.61	-5.15366
b0279	yagM	CP4-6 prophage; predicted protein	-6.94	-6.75885
b0280	yagN	CP4-6 prophage; predicted protein	-8.92	-8.51719
b0283	paoD	moco insertion factor for PaoABC aldehyde oxidoreductase	-9.67	-7.43195
b0289	yagV	conserved protein	-6.89	-6.06893
b0290	yagW	predicted receptor	-7.6	-5.17344
b0291	yagX	predicted aromatic compound dioxygenase	-7.77	-7.87267
b0292	matC	predicted protein	-5.44	-4.77041
b0293	matB	cryptic Mat fimbrillin gene	-7.35	-4.76953
b0295	ykgL	predicted protein	-7.34	-5.45437
b0300	ykgA	predicted DNA-binding transcriptional regulator	-8.7	-6.845
b0303	ykgI	predicted protein	-9.48	-7.42284
b0306	ykgE	predicted oxidoreductase	-5.16	-5.83214
b0308	ykgG	predicted transporter	-6.04	-5.42393
b0317	yahC	predicted inner membrane protein	-8.72	-5.07898
b0319	yahE	predicted protein	-5.32	-4.27483
b0320	yahF	predicted acyl-CoA synthetase with NAD(P)-binding domain and succinyl-CoA synthetase domain	-6.88	-5.71446
b0321	yahG	conserved protein	-4.58	-4.24729
b0324	yahJ	predicted deaminase with metallo-dependent hydrolase domain	-7.48	-5.72775
b0326	yahL	predicted protein	-7.97	-5.08338
b0327	yahM	predicted protein	-7.04	-5.43205
b1164	ycgZ	connector protein for RcsB regulation of biofilm and acid-resistance	-1.59	-1.35189
b1165	ymgA	connector protein for RcsB regulation of biofilm	-1.66	-1.31068
b1166	ariR	connector protein for RcsB regulation of biofilm and acid-resistance	-1.5	-1.16463
b1406	ydbC	predicted oxidoreductase, NAD(P)-binding	-1.14	-1.69243
b2173	yeiR	predicted enzyme	-1.38	-1.2296
b2875	yqeB	conserved protein with NAD(P)-binding Rossman fold	-1.43	-1.95191
b2876	yqeC	conserved protein	-1.76	-2.60222
b2880	ygfM	predicted oxidoreductase	-1.08	-1.95638
b3109	yhaM	hypothetical protein	-1.12	-1.35499
b3113	tdcF	predicted L-PSP (mRNA) endoribonuclease	-3.92	-5.26571
b3160	yhbW	predicted enzyme	-2	-2.70689
b4217	ytfK	conserved protein, DUF1107 family	-1.33	-1.98344
b4335	yjiM	predicted 2-hydroxyglutaryl-CoA dehydratase	-1.44	-1.62907

## Sheet: 0 vs 60-up
Blattner number	Gene name	Functional description	Log2 ratio(no shock)	Log2 ratio(shock 60min)
Response to stress
b1304	pspA	phage shock protein PspA	1.82	6.76
b1500	b1500	small membrane protein, connecting EvgS/EvgA and PhoQ/PhoP	1.46	1.04
b2851	ygeG	predicted chaperone	1.55	1.78
Regulation
b0989	cspH	cold shock-like protein cspH	1	1.46
b1145	ymfK	e14 prophage; repressor protein phage e14	9.11	7.58
b1146	ymfT	e14 prophage; predicted DNA-binding transcriptional regulator	9.1	7.46
b1147	ymfL	e14 prophage; predicted DNA-binding transcriptional regulator	5.24	2.66
b1149	ymfN	e14 prophage; predicted DNA-binding transcriptional regulator	6.82	6.26
b1285	yciR	RNase II stability modulator	1.2	1.03
b1375	ynaE	Qin prophage; predicted DNA-binding transcriptional regulator	1.04	1.66
b1499	yedO	transcriptional regulator YdeO	1.42	1.16
b2369	evgA	DNA-binding transcriptional activator EvgA	1.47	1.05
b2852	ygeH	predicted transcriptional regulator	1.49	1.94
b2855	ygeK	putative 2-component transcriptional regulator	1.35	2.01
b3507	yhiF	putative transcriptional regulator YhiF	1.62	1.64
b3512	yhiE	DNA-binding transcriptional activator	2.57	2.28
b3515	yhiW	putative ARAC-type regulatory protein	1.36	1.18
b3516	gadX	DNA-binding transcriptional regulator GadX	2.53	1.4
b3743	asnC	DNA-binding transcriptional regulator AsnC	2.54	4.64
b4017	arpA	regulator of acetyl CoA synthetase	1.15	1.7
transport and membrane
b0612	citT	citrate:succinate antiporter	1.11	1.38
b0898	ycaD	MFS family transporter	1.07	1.18
b0978	appC	cytochrome bd-II oxidase subunit I	1.7	2.4
b0979	appB	cytochrome bd-II oxidase subunit II	1.62	2.05
b1038	csgF	predicted transport protein,curli assembly protein CsgF	1.16	1.55
b1039	csgE	curli assembly protein CsgE, predicted transport protein	1.28	1.79
b1408	ynbA	predicted inner membryane protein	1.03	1.78
b1472	yddL	putaive outer membrane porin protein	1.07	1.49
b1505	ydeT	Outer membrane usher protein FimD precursor	1.06	1.76
b1660	ydhC	inner membrane transport protein YdhC	1.46	1.13
b1979	yeeL_1	putative transport protein	1.19	1.02
b2313	cvpA	membrane protein required for colicin V production	2.04	2.07
b2704	srlB	glucitol/sorbitol-specific PTS system component IIA	1.93	1.15
b3006	exbB	biopolySLR transport protein ExbB	1.03	1.2
b3506	slp	Slp, Outer membrane protein Slp precursor	2.85	1.16
b3508	yhiD	putative Mg(2+) transport ATPase	1.05	1.74
b3513	yhiU	multidrug resistance efflux protein MdtE	1.07	2.03
b3654	yicE	putative purine permease YicE, predicted transporter	2.1	3.64
b3909	kdgT	2-keto-3-deoxygluconate permease,2-keto-3-deoxy-D-gluconate transporter	3.65	2.79
Metabolism
b0522	purK	phosphoribosylaminoimidazole carboxylase ATPase subunit	1.98	3.14
b0523	purE	phosphoribosylaminoimidazole carboxylase catalytic subunit	2.37	3.73
b0674	asnB	asparagine synthetase B	1.59	1.5
b0945	pyrD	dihydroorotate dehydrogenase 2	1.16	1.59
b1198	dhaM	dihydroxyacetone kinase subunit M	1.03	1.32
b1199	dhaL	dihydroxyacetone kinase ADP-binding subunit	1.1	1.46
b1800	yeaU	putative tartrate dehydrogenase	1.98	1.58
b1849	purT	phosphoribosylglycinamide formyltransferase 2	2.06	3.49
b2055	wcaE	glycosyl transferase	1.08	1.3
b2312	purF	amidophosphoribosyltransferase	1.55	1.28
b2476	purC	phosphoribosylaminoimidazole-succinocarboxamide synthase	1.82	2.12
b2499	purM	phosphoribosylaminoimidazole synthetase	2.22	4.13
b2500	purN	phosphoribosylglycinamide formyltransferase	1.19	2.31
b2557	purL	phosphoribosylformyl-glycineamide synthetase	1.83	3.1
b2654	ygaQ	hypothetical protein YgaQ	1.93	2.36
b2656	ygaR	hypothetical protein YgaR	1.41	2.13
b2657	yqaC	conserved protein YqaC	1.06	1.73
b2658	yqaD	conserved protein YqaD	1.11	1.22
b2705	srlD	sorbitol-6-phosphate dehydrogenase	1.95	1.02
b2842	kduD	2-deoxy-D-gluconate 3-dehydrogenase	3.88	4.49
b2843	kduI	5-keto-4-deoxyuronate isoSLRase	4.14	4.95
b2913	serA	D-3-phosphoglycerate dehydrogenase	1.26	1.4
b3526	kdgK	2-dehydro-3-deoxygluconokinase, ketodeoxygluconokinase	2.04	2.49
b4005	purD	phosphoribosylglycinamide synthetase phosphoribosylamine-glycine ligase	2.55	3.18
b4006	purH	bifunctional phosphoribosylaminoimidazolecarboxamide formyltransferase/IMP cyclohydrolase	2	3.55
b4014	aceB	malate synthase	1.47	2.32
b4015	aceA	isocitrate lyase	1.2	2.42
b4245	pyrB	aspartate carbamoyltransferase catalytic subunit	1.01	1.82
b4246	pyrL	pyrBI operon leader peptide	1.39	2.76
DNA recombination and DNA repair
b0539	ybcC	putative exonuclease encoded by prophage	3.04	2.06
b1140	intE	e14 prophage; predicted integrase	10	6.02
b1141	xisE	e14 prophage; predicted excisionase	8.17	8.51
b1158	pin	e14 prophage; site-specific DNA recombinase	4.05	3.58
b1159	mcrA	e14 prophage; 5-methylcytosine-specific restriction endonuclease B	10.02	6.55
other or undefined functions
b0218	yafU	Predicted protein	1.13	1.13
b0362	yaiF	predicted protein	1.81	1.82
b0370	ykiB	predicted protein	2.3	1.92
b0371	yaiT	hypothetical protein	1.03	1.27
b0439	lon	DNA-binding ATP-dependent protease La	1.88	3.91
b0533	sfmH	SfmH ,predicted fimbrial-like adhesin protein	1.04	1.26
b0548	ninE	prophage protein NinE	1	2.06
b0646	ybeS	predicted chaperone	1.03	1.38
b0980	appA	phosphoanhydride phosphorylase	1.06	1.77
b1137	ymfD	e14 prophage; predicted SAM-dependent methyltransferase	8.66	8.79
b1139	lit	cell death peptidase, inhibitor of T4 late gene expression	8.92	9.49
b1142	ymfH	e14 prophage;hypothetical protein	7.79	6.85
b1143	ymfI	e14 prophage; predicted protein	10.72	8.78
b1144	ymfJ	e14 prophage; predicted protein	9.32	6.77
b1148	ymfM	e14 prophage; predicted protein	6.26	3.71
b1150	ymfR	e14 prophage; predicted protein	6.12	6.41
b1151	ymfO	e14 prophage; predicted protein	8.14	7.35
b1152	ymfP	e14 prophage; predicted protein	4.48	2.47
b1153	ymfQ	e14 prophage; conserved protein	6.89	4
b1154	ycfK	e14 prophage; predicted protein	7.02	3.98
b1155	ymfS	e14 prophage; predicted protein	7.96	6.73
b1156	tfaE	e14 prophage; predicted tail fiber assembly protein	8.82	6.83
b1157	stfE	putative tail fiber protein	8.17	5.4
b1347	ydaC	hypothetical protein	1.26	1.45
b1351	racC	hypothetical protein	1.1	2.23
b1352	kilR	FtsZ inhibitor protein	1.22	1.82
b1455	yncH	hypothetical protein,Required for swarming phenotype, function unknown	1.68	1.11
b1470	yddJ	hypothetical protein	1.44	2
b1471	yddK	putative glycoprotein	2.16	2.22
b1556	essQ	Qin prophage; predicted S lysis protein	1.39	1.64
b1576	ydfD	hypothetical protein	1.13	1.85
b1687	ydiJ	putative oxidase	1.05	2.25
b1715	pheM	phenylalanyl-tRNA synthetase (pheST) operon leader peptide	1.13	1.95
b1934	yedN_1	hypothetical protein	1.07	1.11
b1935	yedM	conserved protein	2.04	1.05
b2112	yehE		1.24	1.12
b2115	molR_1	hypothetical protein	1.02	1.32
b2269	elaD	predicted enzyme	1.01	1.48
b2273	yfbN	predicted protein	1.07	1.24
b2443	yffL	CPZ-55 prophage; predicted protein	1.41	1.18
b2444	yffM	CPZ-55 prophage; predicted protein	3.24	1.61
b2449	yffR	CPZ-55 prophage; predicted protein	3.14	2.01
b2598	pheL	pheA gene leader peptide	1.95	1.05
b2849	yqeK	hypothetical protein	1.15	2.04
b2850	ygeF	hypothetical protein	1.52	2.26
b2854	pbI	predicted peptidoglycan-binding enzyme	1.62	2.27
b2857	ygeM	hypothetical protein	1.67	1.95
b2858	ygeN	hypothetical protein	1.22	1.32
b3443	yrhA	hypothetical protein	1.31	1.21
b4038	yjbI	hypothetical protein	1.03	1.04
b4107	phnB	hypothetical protein	1.21	1.06
b4252	yjgK	hypothetical protein	2.52	2.32
b4314	fimA	FimA , major type 1 subunit fimbrin (pilin)	1.47	1.36

## Sheet: 0 vs 60-down
Blattner number	Gene name	Functional description	Log2 ratio(no shock)	Log2 ratio(shock 60min)
response to stress
b0311	betA	choline dehydrogenase, a flavoprotein	-5.66	-8.08
b0312	betB	betaine aldehyde dehydrogenase, NAD-dependent	-8.31	-10.42
b0314	betT	choline transport protein BetT	-9.43	-12
Regulation
b0272	yagI	CP4-6 prophage; predicted DNA-binding transcriptional regulator	-6.82	-6.1
b0282	yagP	putative LysR-like transcriptional regulator	-9.08	-6.9
b0294	ykgK	putative regulator	-9.28	-6.68
b0305	ykgD	putative ARAC-type regulatory protein regulator	-7.26	-6.47
b0313	betI	transcriptional regulator BetI	-7.28	-9.52
b0315	yahA	hypothetical protein	-9.32	-10.06
b0316	yahB	putative transcriptional regulator YahB	-8.55	-5.93
b0330	prpR	DNA-binding transcriptional activator	-4.95	-5.57
b0338	cynR	DNA-binding transcriptional regulator CynR	-7.2	-5.73
b0852	rimK	ribosomal protein S6 modification protein	-1.53	-2.2
b1827	kdgR	transcriptional regulator kdgR	-1.44	-2.85
b3118	tdcA	DNA-binding transcriptional activator TdcA	-2.76	-2.42
transport and membrane
b0260	mmuP	CP4-6 prophage; predicted S-methylmethionine transporter	-6.05	-5
b0262	afuC	CP4-6 prophage; predicted ferric transporter subunit	-6	-6.34
b0270	yagG	CP4-6 prophage; predicted sugar transporter	-8.8	-7.38
b0288	ykgJ	putative ferredoxin	-5.7	-4.54
b0307	ykgF	putative electron transport protein ykgF	-7.69	-7.72
b0328	yahN	putative neutral amino-acid efflux system	-8.06	-7.4
b0336	codB	cytosine permease	-8.34	-4.74
b1243	oppA	oligopeptide transport periplasmic binding protein	-2.56	-3.64
b1244	oppB	oligopeptide transporter permease	-1.54	-2.38
b1245	oppC	oligopeptide transport system permease protein oppC	-1.23	-2.31
b1246	oppD	oligopeptide transporter ATP-binding component	-1.27	-2.13
b1247	oppF	oligopeptide ABC transporter ATP-binding protein	-1.25	-1.88
b2240	glpT	sn-glycerol-3-phosphate transporter	-1.26	-2.35
b2964	nupG	nucleoside permease nupG	-1.53	-1.62
b3116	tdcC	threonine/serine transporter TdcC	-4.49	-4.36
b3573	yiaI	putative electron transport protein ysaA	-1.18	-1.06
b4032	malG	maltose transporter permease	-1.19	-2.37
b4033	malF	maltose transporter membrane protein	-1.36	-2.24
b4034	malE	maltose ABC transporter periplasmic protein	-1.25	-2.11
b4035	malK	maltose/maltodextrin transporter ATP-binding protein	-1.62	-2.41
b4036	lamB	maltose outer membrane porin (maltoporin)	-2.02	-2.6
b4037	malM	maltose regulon periplasmic protein	-1.81	-2
b4240	treB	trehalose(maltose)-specific PTS system components IIBC	-2.19	-3.95
metabolism
b0114	aceE	pyruvate dehydrogenase subunit E1	-1.37	-1.27
b0261	mmuM	CP4-6 prophage; S-methylmethionine:homocysteine methyltransferase	-7.38	-7.12
b0268	yagE	CP4-6 prophage; predicted lyase/synthase	-8.84	-6.09
b0269	yagF	CP4-6 prophage; predicted dehydratase	-5.15	-4.66
b0271	yagH	CP4-6 prophage; predicted xylosidase/arabinosidase	-6.01	-5.59
b0273	argF	CP4-6 prophage; ornithine carbamoyltransferase 2, chain F	-7.34	-5.52
b0297	eaeH	putative adhesin	-7.02	-4.78
b0304	ykgC	pyridine nucleotide-disulfide oxidoreductase	-6.31	-7.23
b0323	yahI	predicted carbamate kinase-like protein	-5.76	-4.71
b0325	yahK	putative oxidoreductase	-6.98	-10.05
b0331	prpB	2-methylisocitrate lyase	-4.2	-1.22
b0333	prpC	methylcitrate synthase	-3.84	-2.33
b0335	prpE	predicted propionyl-CoA synthetase with ATPase domain	-5.87	-3.55
b0337	codA	cytosine deaminase	-7.64	-9.33
b0339	cynT	carbonic anhydrase	-7.64	-3.89
b0350	mhpD	2-keto-4-pentenoate hydratase	-4.35	-3.52
b3111	tdcG	L-serine dehydratase 1	-4.28	-2.04
b3112	tdcG	L-serine dehydratase 1	-4.27	-2.37
b3114	tdcE	putative formate acetyltransferase 3	-4.53	-3.59
b3115	tdcD	propionate/acetate kinase	-4.25	-4.05
b3117	tdcB	threonine dehydratase	-4.27	-4.49
b4239	treC	trehalose-6-phosphate hydrolase	-2.37	-3.6
DNA recombination and DNA repair
b0267	yagA	CP4-6 prophage; predicted DNA-binding transcriptional regulator	-6.83	-3.97
b0278	yagL	CP4-6 prophage; DNA-binding protein	-5.86	-5.08
b0281	intF	CP4-6 prophage; predicted phage integrase	-9.13	-7.9
b0299	tra5_5	IS3 element protein InsF	-1.18	-1.17
others and function unknown
b0263	afuB	pseudo	-6.4	-5.4
b0266	yagB	pseudo	-7.67	-6.21
b0276	yagJ	CP4-6 prophage; predicted protein	-6.05	-5.6
b0277	yagK	CP4-6 prophage; conserved protein	-5.61	-5.79
b0279	yagM	CP4-6 prophage; predicted protein	-6.94	-7.46
b0280	yagN	CP4-6 prophage; predicted protein	-8.92	-8.68
b0283	yagQ	hypothetical protein	-9.67	-8.17
b0287	yagU	hypothetical protein	-9.15	-8.09
b0289	yagV	hypothetical protein	-6.89	-5.62
b0290	yagW	putative receptor	-7.6	-5.56
b0291	yagX	hypothetical protein	-7.77	-6.37
b0292	yagY	hypothetical protein	-5.44	-5.02
b0293	yagZ	hypothetical protein	-7.35	-4.8
b0295	ykgL	hypothetical protein	-7.34	-5.28
b0300	ykgA	pseudo	-8.7	-6.69
b0301	ykgB	hypothetical protein	-8.15	-7.25
b0303	ykgI	hypothetical protein	-9.48	-7.59
b0306	ykgE	putative dehydrogenase subunit	-5.16	-5.08
b0308	ykgG	hypothetical protein	-6.04	-6.67
b0310	ykgH	hypothetical protein	-7.57	-8.03
b0317	yahC	hypothetical protein	-8.72	-7.67
b0318	yahD	putative transcription factor	-6.88	-4.92
b0319	yahE	hypothetical protei	-5.32	-4.87
b0320	yahF	putative oxidoreductase subunit	-6.88	-5.1
b0321	yahG	hypothetical protein	-4.58	-3.45
b0324	yahJ	deaminase	-7.48	-4.96
b0326	yahL	hypothetical protein	-7.97	-6.44
b0327	yahM	hypothetical protein	-7.04	-5.24
b0578	nfnB	dihydropteridine reductase	-1.37	-1.64
b0850	ybjC	hypothetical protein	-2.11	-1.76
b0851	nfsA	nitroreductase A	-1.95	-1.36
b1164	ycgZ	hypothetical protein	-1.59	-1.99
b1165	ymgA	predicted protein	-1.66	-2.26
b1166	ymgB	predicted protein	-1.5	-2.97
b2875	yqeB	putative synthase	-1.43	-1.63
b2876	yqeC	hypothetical protein	-1.76	-1.71
b3113	tdcf	predicted L-PSP (mRNA) endoribonuclease	-3.92	-2.58
b3924	fpr	ferredoxin-NADP reductase	-1.12	-1.87
b4335	yjiM	hypothetical protein	-1.44	-2.15

## Sheet: 10 vs 60-up
Blattner number	Gene name	Functional description	Log2 ratio (10min)	Log2 ratio(60min)
response to stress
b1304	pspA	regulatory protein for phage-shock-protein operon	1.68271	6.76
b1500	safA	Two component system connector membrane protein, EvgSA to PhoQP	1.91748	1.04
b2851	ygeG	predicted chaperone	1.50994	1.78
regulation
b0535	fimZ	predicted DNA-binding transcriptional regulator	1.14774	1.6
b1040	csgD	DNA-binding transcriptional activator for csgBA	1.05146	1.85
b1162	ycgE	repressor of blue light-responsive genes	1.0568	3.01
b1285	gmr	cyclic-di-GMP phosphodiesterase; csgD regulator; modulator of Rnase II stability	1.51472	1.03
b1499	ydeO	transcriptional activator for mdtEF	1.15307	1.16
b2369	evgA	DNA-binding response regulator in two-component regulatory system with EvgS	1.07845	1.05
b2855	ygeK	predicted DNA-binding transcriptional regulator	1.25615	2.01
b2856	ygeL	hypothetical protein	1.5147	1.2
b3119	tdcR	DNA-binding transcriptional activator	1.16892	1.96
b3507	dctR	predicted DNA-binding ranscriptional regulator	1.63078	1.64
b3512	gadE	DNA-binding transcriptional activator	2.90369	2.28
b3515	gadW	transcriptional activator of gadA and gadBC in absence of GadX	1.60538	1.18
b3516	gadX	DNA-binding transcriptional dual regulator	2.13355	1.4
b3743	asnC	DNA-binding transcriptional dual regulator	2.69669	4.64
b4017	arpA	ankyrin repeat protein	1.75075	1.7
transport and membrane
b0218	yafU	hypothetical protein,an inner membrane protein	1.19089	1.13
b0978	appC	cytochrome bd-II oxidase, subunit I	2.30677	2.4
b0979	appB	cytochrome bd-II oxidase, subunit II	2.32484	2.05
b1038	csgF	outer membrane protein involved in curlin assembly/transport	1.4532	1.55
b1039	csgE	curli production assembly/transport componen	1.29714	1.79
b1472	yddL	putative outer membrane porin protein	1.60042	1.49
b1496	yddA	fused predicted multidrug transporter subunits of ABC superfamily: membrane component/ATP-binding component	1.03816	1.25
b1660	ydhC	predicted transporter	2.14323	1.13
b1980	yeeL_1	hypothetical protein	1.07123	1.36
b2109	yehB	predicted outer membrane protein	1.18943	1.05
b2313	cvpA	membrane protein required for colicin V production	2.20082	2.07
b2376	ypdI	predicted lipoprotein involved in colanic acid biosynthesis	1.02841	1.42
b2704	srlB	glucitol/sorbitol-specific enzyme IIA component of PTS	2.134	1.15
b2848	yqeJ	predicted protein	1.1512	2.14
b3006	exbB	membrane spanning protein in TonB-ExbB-ExbD complex	1.30011	1.2
b3506	slp	outer membrane lipoprotein	2.97572	1.16
b3508	yhiD	predicted Mg(2+) transport ATPase, inner membrane protein	1.30869	1.74
b3513	mdtE	multidrug resistance efflux transporter	1.617	2.03
b3514	mdtF	multidrug transporter, RpoS-dependent	1.09643	1.53
b3654	xanP	xanthine permease	2.32623	3.64
b3909	kdgT	2-keto-3-deoxy-D-gluconate transporter	3.96644	2.79
metabolism
b0142	folK	2-amino-4-hydroxy-6-hydroxymethyldihyropteridine pyrophosphokinase	1.0582	1.28
b0439	lon	DNA-binding ATP-dependent protease La	2.40562	3.91
b0523	purE	N5-carboxyaminoimidazole ribonucleotide mutase	2.47905	3.73
b0533	sfmH	predicted fimbrial-like adhesin protein	1.63743	1.26
b0616	citE	citrate lyase, citryl-ACP lyase (beta) subunit	1.16602	1.34
b0674	asnB	asparagine synthetase B	2.05992	1.5
b0908	aroA	5-enolpyruvylshikimate-3-phosphate synthetase	1.10154	1.47
b1062	pyrC	dihydro-orotase	1.02729	1.56
b1131	purB	adenylosuccinate lyase	1.66163	1.76
b1198	dhaM	fused predicted dihydroxyacetone-specific PTS enzymes: HPr component/EI component	1.35793	1.32
b1199	dhaL	dihydroxyacetone kinase, C-terminal domain	1.39146	1.46
b1200	dhaK	dihydroxyacetone kinase, PTS-dependent, dihydroxyacetone-binding subunit	1.21994	1.67
b1352	kilR	Rac prophage; inhibitor of ftsZ, killing protein	1.19364	1.82
b1519	tam	trans-aconitate methyltransferase	1.22246	1.19
b1694	ydiF	fused predicted acetyl-CoA:acetoacetyl-CoA transferase: alpha subunit/beta subunit	1.46646	1.71
b1714	pheS	phenylalanine tRNA synthetase, alpha subunit	1.61342	1.19
b1715	pheM	phenylalanyl-tRNA synthetase operon leader peptide	1.6927	1.95
b1800	dmlA	D-malate oxidase, NAD-dependent; probable tartrate dehydrogenase	1.50101	1.58
b1849	purT	phosphoribosylglycinamide formyltransferase 2	2.50258	3.49
b1850	eda	multifunctional 2-keto-3-deoxygluconate 6-phosphate aldolase and 2-keto-4-hydroxyglutarate aldolase and oxaloacetate decarboxylase	1.13074	1.25
b2110	yehC	predicted periplasmic pilin chaperone	1.23055	1.2
b2263	menH	2-succinyl-6-hydroxy-2,4-cyclohexadiene-1-carboxylate synthase	1.44044	3.08
b2264	menD	bifunctional 2-oxoglutarate decarboxylase/ SHCHC synthase	1.00977	2.77
b2269	elaD	protease, capable of cleaving an AMC-ubiquitin model substrate	1.31187	1.48
b2312	purF	amidophosphoribosyltransferase	1.86532	1.28
b2476	purC	phosphoribosylaminoimidazole-succinocarboxamide synthetase	2.31098	2.12
b2499	purM	phosphoribosylaminoimidazole synthetase	3.04657	4.13
b2500	purN	phosphoribosylglycinamide formyltransferase 1	1.79576	2.31
b2557	purL	phosphoribosylformyl-glycineamide synthetase	2.12309	3.1
b2654	ygaQ_1	hypothetical protein	1.57226	2.36
b2656	ygaQ_2	hypothetical protein	1.87359	2.13
b2657	ygaQ_3	putative enzyme	1.43419	1.73
b2705	srlD	sorbitol-6-phosphate dehydrogenase	1.98569	1.02
b2842	kduD	2-deoxy-D-gluconate 3-dehydrogenase	4.19511	4.49
b2843	kduI	4-deoxy-L-threo-5-hexosulose-uronate ketol-isomerase	4.86548	4.95
b2913	serA	D-3-phosphoglycerate dehydrogenase	1.46072	1.4
b3212	gltB	glutamate synthase, large subunit	1.37102	1.32
b3526	kdgK	ketodeoxygluconokinase	2.35702	2.49
b4005	purD	phosphoribosylglycinamide synthetase phosphoribosylamine-glycine ligase	2.50758	3.18
b4006	purH	fused IMP cyclohydrolase/phosphoribosylaminoimidazolecarboxamide formyltransferase	2.35564	3.55
b4014	aceB	malate synthase A	3.02711	2.32
b4015	aceA	isocitrate lyase	2.9912	2.42
b4016	aceK	isocitrate dehydrogenase kinase/phosphatase	1.24955	1.49
b4244	pyrI	aspartate carbamoyltransferase, regulatory subunit	1.09057	1.36
b4245	pyrB	aspartate carbamoyltransferase, catalytic subunit	1.19201	1.82
b4246	pyrL	pyrBI operon leader peptide	1.41703	2.76
b4314	fimA	major type 1 subunit fimbrin (pilin)	1.0261	1.36
b4316	fimC	chaperone, periplasmic	1.53758	1.91
others and function unknown
b0370	ykiB	hypothetical protein	1.77734	1.92
b0554	essD	DLP12 prophage; predicted phage lysis protein	1.02625	1.23
b0833	yliE	predicted cyclic-di-GMP phosphodiesterase, inner membrane protein	1.15703	1.53
b0980	appA	phosphoanhydride phosphorylase	1.56664	1.77
b1152	ymfP	hypothetical protein	2.54347	2.47
b1153	ymfQ	prohage e14 tail protein homolog	4.26713	4
b1154	stfP	e14 prophage; predicted protein	3.21966	3.98
b1163	ycgF	anti-repressor for YcgE, blue light-responsive; FAD-binding; has c-di-GMP phosphodiesterase-like EAL domain, but does not degrade c-di-GMP	2.28681	1.96
b1347	ydaC	Rac prophage; predicted protein	1.44217	1.45
b1351	racC	Rac prophage; predicted protein	1.23046	2.23
b1455	yncH	conserved protein	1.91109	1.11
b1456	rhsE	RhsE protein in rhs element	1.00164	1.59
b1470	yddJ	predicted protein	1.59805	2
b1471	yddK	putative glycoportein	1.85852	2.22
b1553	rzpQ	Rz-like equivalent, Qin prophage	1.05892	1.35
b1573	ydfC	conserved protein, Qin prophage	1.1133	1.14
b1576	ydfD	Qin prophage; predicted protein	1.44881	1.85
b1686	ydiI	acyl-CoA esterase in vitro	1.02738	1.44
b1687	ydiJ	predicted FAD-linked oxidoreductase	1.91948	2.25
b1934	yedN_1	hypothetical protein	1.36381	1.11
b1935	yedM	hypothetical protein	2.57845	1.05
b2112	yehE	predicted protein	1.38995	1.12
b2598	pheL	pheA gene leader peptide	1.195	1.05
b2625	yfjI	CP4-57 prophage; predicted protein	1.10013	1.13
b2849	yqeK	predicted protein	1.34406	2.04
b2850	ygeF	hypothetical protein	1.983	2.26
b2854	pbl	hypothetical protein,predicted peptidoglycan-binding enzyme	1.82713	2.27
b2857	ygeM	hypothetical protein	2.05572	1.95
b2858	ygeN	hypothetical protein	1.8935	1.32
b3000	yghX_2	hypothetical protein	1.2692	1.28
b3121	yhaC	predicted protein	1.28334	1.87
b3443	yrhA	hypothetical protein	1.51368	1.21
b3490	yhiL	hypothetical protein	1.12675	1.04
b3491	yhiM	inner membrane protein, DUF1323 family	1.17594	1.69
b4038	yjbI	hypothetical protein	1.17238	1.04
b4107	yjdN	conserved protein	1.744	1.06
b4252	tabA	biofilm modulator regulated by toxins	2.40772	2.32
b4253	yjgL	predicted protein	1.11882	1.52
b1004	wrbA	NAD(P)H:quinone oxidoreductase	1.2294
b1283	osmB	lipoprotein	2.43187
b1482	osmC	Lipoyl-dependent Cys-based peroxidase, hydroperoxide resistance; salt-shock inducible membrane protein; peroxiredoxin	1.78229
b1597	asr	acid shock-inducible periplasmic protein	1.1297
b1710	btuE	glutathione peroxidase	1.39485
b1732	katE	hydroperoxidase HPII(III) (catalase)	1.97116
b1838	pphA	serine/threonine-specific protein phosphatase 1	1.00057
b1896	otsA	trehalose-6-phosphate synthase	2.48927
b1897	otsB	trehalose-6-phosphate phosphatase, biosynthetic	3.16556
b1967	hchA	Hsp31 molecular chaperone	1.82507
b3153	yhbO	stress-resistance protein	1.30736
b3494	uspB	universal stress (ethanol tolerance) protein B	1.31878
b4045	yjbJ	conserved protein, UPF0337 family	1.38532
b4411	ecnB	entericidin B membrane lipoprotein	1.88955
b0435	bolA	stationary-phase morphogene, transcriptional repressor for mreB; also regulator for dacA, dacC, and ampC	1.38051
b0564	appY	DNA-binding global transcriptional activator; DLP12 prophage	2.18749
b0999	cbpM	modulator of CbpA co-chaperone	1.62014
b1160	iraM	RpoS stabilzer during Mg starvation, anti-RssB factor	1.34458
b1217	chaB	cation transport regulator	1.55618
b1341	ydaM	diguanylate cyclase, csgD regulator	1.51365
b1552	cspI	Qin prophage; cold shock protein	1.77025
b1739	osmE	DNA-binding transcriptional activator	1.28176
b2015	yeeY	predicted DNA-binding transcriptional regulator	1.00289
b2370	evgS	hybrid sensory histidine kinase in two-component regulatory system with EvgA	1.30124
b3023	ygiV	transcriptional repressor for mcbR biofilm gene	1.22794
b3555	yiaG	predicted transcriptional regulator, HTH_CROC1 family	2.28069
b4299	yjhI	KpLE2 phage-like element; predicted DNA-binding transcriptional regulator	1.76838
b0155	clcA	chloride channel, voltage-gated	1.07582
b0453	ybaY	outer membrane lipoprotein	1.19509
b0458	ylaC	inner membrane protein, DUF1449 family	1.4289
b0486	ybaT	predicted transporter	2.94104
b0580	ybdJ	predicted inner membrane protein	1.08158
b0792	ybhR	predicted transporter subunit: membrane component of ABC superfamily	1.02275
b0862	artQ	arginine transporter subunit	1.12831
b0864	artP	arginine transporter subunit	1.17184
b0906	ycaP	inner membrane protein, UPF0702 family	1.01506
b0974	hyaC	hydrogenase 1, b-type cytochrome subunit	3.34286
b1025	ycdT	diguanylate cyclase	1.50243
b1029	ycdU	predicted inner membrane protein	1.11356
b1101	ptsG	fused glucose-specific PTS enzymes: IIB component/IIC component	1.94853
b1195	ymgE	predicted inner membrane protein	2.33215
b1330	ynaI	MscS family inner membrane protein	1.06792
b1440	ydcS	polyhydroxybutyrate (PHB) synthase, ABC transporter periplasmic binding protein homolog	1.56516
b1441	ydcT	predicted spermidine/putrescine transporter subunit	1.30938
b1469	narU	nitrate/nitrite transporter	1.84134
b1492	gadC	predicted glutamate:gamma-aminobutyric acid antiporter	1.92078
b1682	sufC	component of SufBCD complex, ATP-binding component of ABC superfamily	1.92356
b1726	yniB	predicted inner membrane protein	1.16001
b1795	yeaQ	conserved protein, UPF0410 family	2.2721
b1820	yobD	inner membrane protein, UPF0266 family	1.2862
b1907	tyrP	tyrosine transporter	1.36921
b1964	yedS_1	hypothetical protein	1.14284
b2129	yehX	predicted transporter subunit: ATP-binding component of ABC superfamily	1.06489
b2130	yehY	predicted transporter subunit: membrane component of ABC superfamily	1.54274
b2131	osmF	predicted transporter subunit: periplasmic-binding component of ABC superfamily	1.55739
b2135	yohC	inner membrane protein, Yip1 family	1.67133
b2141	yohJ	inner membrane protein, UPF0299 family	1.02217
b2347	yfdC	predicted inner membrane protein	1.03431
b2789	gudP	predicted D-glucarate transporter	1.0265
b2924	mscS	mechanosensitive channel protein, small conductance	1.07152
b3099	yqjE	inner membrane protein, DUF1469 family	1.33558
b3103	yhaH	inner membrane protein, DUF805 family	1.17715
b3127	garP	predicted (D)-galactarate transporter	1.40012
b3522	yhjD	putative alternate lipid exporter, suppressor of msbA and KDO essentiality, inner membrane protein	1.63278
b3524	yhjG	Inner membrane protein, AsmA family	1.09024
b4111	proP	proline/glycine betaine transporter	1.30714
b4149	blc	outer membrane lipoprotein (lipocalin), cell division and growth function	2.4669
b4296	yjhF	KpLE2 phage-like element; predicted transporter	1.74375
b4336	yjiN	zinc-type alcohol dehydrogenase-like protein	1.16347
b0071	leuD	3-isopropylmalate dehydratase small subunit	1.51735
b0072	leuC	3-isopropylmalate dehydratase large subunit	1.86566
b0073	leuB	3-isopropylmalate dehydrogenase, NAD(+)-dependent	2.66279
b0074	leuA	2-isopropylmalate synthase	1.72903
b0186	ldcC	lysine decarboxylase 2, constitutive	1.54382
b0485	ybaS	glutaminase	3.18514
b0581	ybdK	weak gamma-glutamyl:cysteine ligase	1.30298
b0622	pagP	phospholipid:lipid A palmitoyltransferase	1.01803
b0721	sdhC	succinate dehydrogenase, membrane subunit, binds cytochrome b556	1.17045
b0865	ybjP	lipoprotein	1.44674
b0897	ycaC	predicted hydrolase, isochorismatase family	1.87837
b0907	serC	3-phosphoserine/phosphohydroxythreonine aminotransferase	1.24422
b1249	cls	cardiolipin synthase 1	1.22409
b1298	puuD	gamma-Glu-GABA hydrolase	1.35858
b1409	ynbB	predicted CDP-diglyceride synthase	1.5883
b1466	narW	nitrate reductase 2 (NRZ), delta subunit (assembly subunit)	1.09376
b1468	narZ	nitrate reductase 2 (NRZ), alpha subunit	1.2386
b1493	gadB	glutamate decarboxylase B, PLP-dependent	1.70907
b1661	cfa	cyclopropane fatty acyl phospholipid synthase (unsaturated-phospholipid methyltransferase)	1.29765
b1678	ynhG	murein L,D-transpeptidase	2.04432
b1680	sufS	cysteine desulfurase, stimulated by SufE; selenocysteine lyase, PLP-dependent	1.57788
b1713	pheT	phenylalanine tRNA synthetase, beta subunit	1.67912
b1927	amyA	cytoplasmic alpha-amylase	1.81062
b1955	yedP	predicted mannosyl-3-phosphoglycerate phosphatase	1.76561
b2032	wbbK	lipopolysaccharide biosynthesis protein	1.02097
b2033	wbbJ	predicted lipopolysaccharide biosynthesis O-acetyl transferase	1.04956
b2034	wbbI	d-Galf:alpha-d-Glc beta-1,6-galactofuranosyltransferase	1.10734
b2035	rfc	O-antigen polymerase	1.08854
b2036	glf	UDP-galactopyranose mutase, FAD/NAD(P)-binding	1.09623
b2037	rfbX	predicted polisoprenol-linked O-antigen transporter	1.25434
b2038	rfbC	dTDP-4-deoxyrhamnose-3,5-epimerase	1.06319
b2039	rfbA	glucose-1-phosphate thymidylyltransferase	1.02863
b2097	fbaB	fructose-bisphosphate aldolase class I	1.76814
b2137	yohF	predicted oxidoreductase with NAD(P)-binding Rossmann-fold domain	1.36432
b2253	arnB	uridine 5'-(beta-1-threo-pentapyranosyl-4-ulose diphosphate) aminotransferase, PLP-dependent	1.0941
b2464	talA	transaldolase A	2.33002
b2465	tktB	transketolase 2, thiamin-binding	2.53798
b2551	glyA	serine hydroxymethyltransferase	1.32659
b2599	pheA	fused chorismate mutase P/prephenate dehydratase	1.312
b2600	tyrA	fused chorismate mutase T/prephenate dehydrogenase	1.11083
b2601	aroF	3-deoxy-D-arabino-heptulosonate-7-phosphate synthase, tyrosine-repressible	1.16767
b2605	yfiB	probable positive effector of YfiN activity, OM lipoprotein	1.25634
b2979	glcD	glycolate oxidase subunit, FAD-linked	1.32404
b3012	dkgA	2,5-diketo-D-gluconate reductase A	1.77243
b3213	gltD	glutamate synthase, 4Fe-4S protein, small subunit	1.22692
b3432	glgB	1,4-alpha-glucan branching enzyme	1.51471
b3517	gadA	glutamate decarboxylase A, PLP-dependent	1.77206
b3588	aldB	aldehyde dehydrogenase B	1.05253
b3729	glmS	L-glutamine:D-fructose-6-phosphate aminotransferase	1.03986
b3956	ppc	phosphoenolpyruvate carboxylase	1.22153
b4127	yjdJ	predicted acyltransferase with acyl-CoA N-acyltransferase domain	1.88588
b4187	aidB	isovaleryl CoA dehydrogenase	1.574
b4297	yjhG	KpLE2 phage-like element; predicted dehydratase	2.03923
b4298	yjhH	KpLE2 phage-like element; predicted lyase/synthase	2.20536
b0552	insH	IS5 transposase and trans-activator	2.04095
b0708	phr	deoxyribodipyrimidine photolyase, FAD-binding	1.28943
b1345	intR	Rac prophage; integrase	1.04578
b1459	yncM	hypothetical protein	1.62959
b4312	fimB	tyrosine recombinase/inversion of on/off regulator of fimA	1.00933
b0136	yadK	predicted fimbrial-like adhesin protein	1.14493
b0363	yaiP	predicted glucosyltransferase	1.41875
b0364	yaiS	conserved protein	1.00248
b0384	psiF	conserved protein, PsiF family, pho regulon	1.97357
b0498	ybbC	predicted protein	1.5279
b0499	ylbH	hypothetical protein	1.46121
b0500	ybbD	hypothetical protein	1.90534
b0510	ybbV	hypothetical protein	1.78209
b0690	ybfG	hypothetical protein	1.10037
b0707	ybgA	conserved protein, DUF1722 family	2.08558
b0753	ybgS	conserved protein	1.09372
b0790	ybhP	conserved protein, endo/exonuclease/phosphatase family PFAM PF03372	1.37269
b0803	ybiI	DksA-type zinc finger protein, function unknown	1.63227
b0839	dacC	D-alanyl-D-alanine carboxypeptidase (penicillin-binding protein 6a)	1.31865
b0871	poxB	pyruvate dehydrogenase (pyruvate oxidase), thiamin-dependent, FAD-binding	1.80532
b0955	ycbZ	predicted peptidase	1.10609
b0972	hyaA	hydrogenase 1, small subunit	3.43363
b0973	hyaB	hydrogenase 1, large subunit	2.9072
b0975	hyaD	protein involved in processing of HyaA and HyaB proteins	2.47082
b0976	hyaE	protein involved in processing of HyaA and HyaB proteins	2.4884
b2665	ygaU	predicted protein	1.64837
b2671	ygaC	predicted protein	1.15728
b2672	ygaM	predicted protein	2.38744
b2853	ygeI	predicted protein	1.43503
b3097	yqjC	conserved protein	1.59026
b3098	yqjD	conserved protein	1.25282
b3100	yqjK	conserved protein	1.58656
b3102	yqjG	predicted S-transferase	1.24643
b3239	yhcO	predicted barnase inhibitor	1.98777
b3336	bfr	bacterioferritin, iron storage and detoxification protein	1.4574
b3362	yhfG	predicted protein	1.1604
b3448	yhhA	conserved protein, DUF2756 family	1.05917
b4047	yjbL	predicted protein	1.30734
b4048	yjbM	predicted protein	1.69117
b4066	yjcF	conserved protein	1.0069
b4126	yjdI	conserved protein	1.99261
b4181	yjfI	conserved protein, DUF2170 family	1.31397
b4215	ytfI	predicted protein	1.1697
b4376	osmY	periplasmic protein	1.25172
b4455	hokA	toxic polypeptide, small	1.40829
b0977	hyaF	protein involved in nickel incorporation into hydrogenase-1 proteins	1.65788
b1000	cbpA	curved DNA-binding protein, DnaJ homologue that functions as a co-chaperone of DnaK	1.38187
b1001	yccE	predicted protein	1.03701
b1003	yccJ	predicted protein	1.32309
b1051	msyB	multicopy suppressor of secY and secA	1.79551
b1058	yceO	predicted protein	1.12463
b1169	ycgH_1	hypothetical protein,putative ATP-binding component of a transport system	1.27
b1182	hlyE	hemolysin E	2.59071
b1188	ycgB	conserved protein	2.64124
b1233	ychJ	conserved protein, UPF0225 family	1.01523
b1257	yciE	predicted rubrerythrin/ferritin-like metal-binding protein	1.01537
b1258	yciF	predicted rubrerythrin/ferritin-like metal-binding protein	1.09303
b1458	yncI	hypothetical protein	1.25257
b1536	ydeI	conserved protein	1.97947
b1614	ydgA	conserved protein, DUF945 family	1.26395
b1668	ydhS	conserved protein with FAD/NAD(P)-binding domain	1.76152
b1679	sufE	sulfur acceptor protein	1.7282
b1681	sufD	FeS cluster assembly protein of SufBCD complex	1.85172
b1683	sufB	component of SufBCD complex	2.36909
b1684	sufA	Fe-S cluster assembly protein	2.2771
b1707	ydiV	predicted cyclic-di-GMP phosphodiesterase	1.43127
b1724	ydiZ	predicted protein	1.69646
b1783	yeaG	protein kinase, function unknown; autokinase	2.66493
b1834	yebT	conserved protein	1.32377
b1836	yebV	predicted protein	2.40868
b1837	yebW	predicted protein	1.53188
b1862	yebB	conserved protein, DUF830 family	1.12003
b1933	yedN_2	hypothetical protein	1.20251
b1953	yodD	predicted protein	2.58589
b1957	yodC	predicted protein	1.94656
b1990	erfK	L,D-transpeptidase linking Lpp to murein	1.80239
b2080	yegP	conserved protein, UPF0339 family	2.13083
b2085	yegR	predicted protein	1.06513
b2266	elaB	conserved protein	1.80671
b2302	yfcG	GSH-dependent disulfide bond oxidoreductase	1.37023
b2345	yfdF	predicted protein	1.02774
b2649	ypjB	hypothetical protein	1.1752
b2650	ypjC	hypothetical protein	2.16287
10min数据

## Sheet: 10 vs 60-down
Blattner number		Gene name	Functional description	Log2 ratio（10min)	Log2 ratio(60min)
b0311	response to stress	betA	choline dehydrogenase, a flavoprotein	-4.69993	-8.08
b0312	response to stress	betB	betaine aldehyde dehydrogenase, NAD-dependent	-8.36581	-10.42
b0314	response to stress	betT	choline transporter of high affinity	-7.14288	-12
b0034	regulation	caiF	DNA-binding transcriptional activator	-1.86437	-1.77
b0146	regulation	sfsA	predicted DNA-binding transcriptional regulator	-1.72032	-1.02
b0272	regulation	yagI	CP4-6 prophage; predicted DNA-binding transcriptional regulator	-6.80304	-6.1
b0282	regulation	yagP	predicted transcriptional regulator LYSR-type	-5.28259	-6.9
b0294	regulation	matA	predicted regulator	-8.36786	-6.68
b0305	regulation	ykgD	predicted DNA-binding transcriptional regulator	-6.09914	-6.47
b0313	regulation	betI	DNA-binding transcriptional repressor	-7.87686	-9.52
b0315	regulation	yahA	c-di-GMP-specific phosphodiesterase	-6.20504	-10.06
b0316	regulation	yahB	predicted DNA-bindng transcriptional regulator	-6.54761	-5.93
b0318	regulation	yahD	ankyrin repeat protein	-5.0579	-4.92
b0330	regulation	prpR	propionate catabolism operon regulatory protein	-4.0348	-5.57
b0338	regulation	cynR	transcriptional activator of cyn operon; autorepressor	-6.83099	-5.73
b0852	regulation	rimK	ribosomal protein S6 modification protein	-2.15226	-2.2
b1611	regulation	fumC	fumarate hydratase (fumarase C),aerobic Class II	-1.02894	-2.33
b1827	regulation	kdgR	DNA-binding transcriptional regulator f kdgK, kdgT, eda	-2.11035	-2.85
b2869	regulation	ygeV	predicted DNA-binding transcriptional regulator	-1.62562	-1.46
b3118	regulation	tdcA	DNA-binding transcriptional activator	-3.22175	-2.42
b0129	transport and membrane	yadI	predicted PTS Enzyme IIA	-1.38428	-1.08
b0260	transport and membrane	mmuP	CP4-6 prophage; predicted S-methylmethionine transporter	-4.66799	-5
b0262	transport and membrane	afuC	CP4-6 prophage; predicted ferric transporter subunit	-6.23699	-6.34
b0270	transport and membrane	yagG	CP4-6 prophage; predicted sugar transporter	-7.04985	-7.38
b0287	transport and membrane	yagU	inner membrane protein, DUF1440 family	-7.90676	-8.09
b0288	transport and membrane	ykgJ	predicted ferredoxin	-4.30647	-4.54
b0296	transport and membrane	ykgM	rpmE (L31) paralog	-7.86704	-6.19
b0301	transport and membrane	ykgB	inner membrane protein, DUF417 family	-8.09715	-7.25
b0307	transport and membrane	ykgF	predicted electron transport protein with ferridoxin-like domai	-7.80814	-7.72
b0310	transport and membrane	ykgH	predicted inner membrane protein	-4.78478	-8.03
b0328	transport and membrane	yahN	inner membrane protein, LysE transporter family; overproduction confers sensitivity to L-homoserine	-9.1867	-7.4
b0336	transport and membrane	codB	cytosine transporter	-6.91084	-4.74
b0850	transport and membrane	ybjC	conserved protein, DUF1418 family	-2.89242	-1.76
b1109	transport and membrane	ndh	respiratory NADH dehydrogenase 2/cupric reductase	-1.05232	-2.41
b1225	transport and membrane	narH	nitrate reductase 1, beta (Fe-S) subunit	-1.01499	-3.11
b1243	transport and membrane	oppA	oligopeptide transporter subunit	-2.81843	-3.64
b1244	transport and membrane	oppB	oligopeptide transporter subunit	-1.55942	-2.38
b1245	transport and membrane	oppC	oligopeptide transporter subunit	-1.14137	-2.31
b1246	transport and membrane	oppD	oligopeptide transporter subunit	-1.02557	-2.13
b1247	transport and membrane	oppF	oligopeptide transporter subunit	-1.38349	-1.88
b2240	transport and membrane	glpT	sn-glycerol-3-phosphate transporter	-2.49141	-2.35
b2243	transport and membrane	glpC	sn-glycerol-3-phosphate dehydrogenase (anaerobic), small subunit	-1.1193	-2.41
b2964	transport and membrane	nupG	nucleoside transporter	-1.93599	-1.62
b3116	transport and membrane	tdcC	L-threonine/L-serine transporter	-5.44371	-4.36
b3573	transport and membrane	ysaA	predicted hydrogenase, 4Fe-4S ferredoxin-type component	-1.89324	-1.06
b4032	transport and membrane	malG	maltose transporter subunit	-1.80637	-2.37
b4033	transport and membrane	malF	maltose transporter subunit	-2.26909	-2.24
b4034	transport and membrane	malE	maltose transporter subunit	-2.20683	-2.11
b4035	transport and membrane	malK	fused maltose transport subunit, ATP-binding component of ABC superfamily/regulatory protein	-2.56881	-2.41
b4036	transport and membrane	lamB	maltose outer membrane porin (maltoporin)	-3.23771	-2.6
b4037	transport and membrane	malM	maltose regulon periplasmic protein	-2.90687	-2
b4120	transport and membrane	melB	melibiose:sodium symporter	-1.78057	-1.38
b4240	transport and membrane	treB	fused trehalose(maltose)-specific PTS enzyme: IIB component/IIC component	-2.74293	-3.95
b4290	transport and membrane	fecB	KpLE2 phage-like element; iron-dicitrate transporter subunit	-1.04783	-1.72
b0030	metabolism	rihC	ribonucleoside hydrolase 3	-1.63835	-1.88
b0114	metabolism	aceE	pyruvate dehydrogenase, decarboxylase component E1, thiamin-binding	-1.20115	-1.27
b0239	metabolism	frsA	fermentation-respiration switch protein; PTS Enzyme IIA(Glc)-binding protein; pNP-butyrate esterase activity	-1.20875	-1.01
b0261	metabolism	mmuM	CP4-6 prophage; S-methylmethionine:homocysteine methyltransferase	-7.14562	-7.12
b0268	metabolism	yagE	CP4-6 prophage; predicted lyase/synthase	-8.26422	-6.09
b0269	metabolism	yagF	CP4-6 prophage; predicted dehydratase	-5.86703	-4.66
b0271	metabolism	yagH	CP4-6 prophage; predicted xylosidase/arabinosidase	-5.80265	-5.59
b0273	metabolism	argF	ornithine carbamoyltransferase 2, chain F; CP4-6 prophage	-6.08305	-5.52
b0284	metabolism	paoC	PaoABC aldehyde oxidoreductase, Moco-containing subunit	-4.46374	-7.2
b0285	metabolism	paoB	PaoABC aldehyde oxidoreductase, FAD-containing subunit	-5.26552	-7.41
b0286	metabolism	paoA	PaoABC aldehyde oxidoreductase, 2Fe-2S subunit	-5.38055	-7.61
b0297	metabolism	eaeH	ttaching and effacing protein homolog, pathogenesis factor	-7.25681	-4.78
b0304	metabolism	ykgC	predicted pyridine nucleotide-disulfide oxidoreductase	-5.61625	-7.23
b0323	metabolism	yahI	carbamate kinase-like protein	-5.12145	-4.71
b0325	metabolism	yahK	predicted oxidoreductase, Zn-dependent and NAD(P)-binding	-6.84376	-10.05
b0331	metabolism	prpB	2-methylisocitrate lyase	-3.41853	-1.22
b0333	metabolism	prpC	2-methylcitrate synthase	-3.40435	-2.33
b0334	metabolism	prpD	2-methylcitrate dehydratase	-6.33281	-2.78
b0335	metabolism	prpE	propionate--CoA ligase	-3.74357	-3.55
b0337	metabolism	codA	cytosine deaminase	-9.64645	-9.33
b0339	metabolism	cynT	carbonic anhydrase	-5.46489	-3.89
b0350	metabolism	mhpD	2-keto-4-pentenoate hydratase	-2.709	-3.52
b0369	metabolism	hemB	5-aminolevulinate dehydratase (porphobilinogen synthase)	-1.40867	-1.44
b0578	metabolism	nfsB	dihydropteridine reductase, NAD(P)H-dependent, oxygen-insensitive	-1.79159	-1.64
b0628	metabolism	lipA	lipoate synthase	-1.14309	-1.61
b0851	metabolism	nfsA	nitroreductase A, NADPH-dependent, FMN-dependent	-2.51958	-1.36
b1226	metabolism	narJ	molybdenum-cofactor-assembly chaperone subunit (delta subunit) of nitrate reductase 1	-1.00248	-3.12
b1498	metabolism	ydeN	conserved protein	-1.04438	-2.68
b2146	metabolism	yeiT	Dihydropyrimidine dehydrogenase, NADH-dependent, subunit A	-1.53116	-1.96
b2147	metabolism	yeiA	Dihydropyrimidine dehydrogenase, NADH-dependent, subunit B	-1.35743	-2.07
b2239	metabolism	glpQ	periplasmic glycerophosphodiester phosphodiesterase	-1.81022	-1.98
b2242	metabolism	glpB	sn-glycerol-3-phosphate dehydrogenase (anaerobic), membrane anchor subunit	-1.29056	-2.06
b3111	metabolism	tdcG	L-serine deaminase III	-5.11793	-2.04
b3112	metabolism	b3112	putative L-serine dehydratase	-5.45631	-2.37
b3114	metabolism	tdcE	pyruvate formate-lyase 4/2-ketobutyrate formate-lyase	-5.61566	-3.59
b3115	metabolism	tdcD	propionate kinase/acetate kinase C, anaerobic	-5.31364	-4.05
b3117	metabolism	tdcB	catabolic threonine dehydratase, PLP-dependent	-5.0911	-4.49
b3924	metabolism	fpr	ferredoxin-NADP reductase	-1.245	-1.87
b4055	metabolism	aphA	acid phosphatase/phosphotransferase, class B, non-specific	-1.38713	-1.15
b4119	metabolism	melA	alpha-galactosidase, NAD(P)-binding	-1.19657	-1.42
b4239	metabolism	treC	trehalose-6-P hydrolase	-2.81427	-3.6
b0267	DNA recombination and repair	yagA	CP4-6 prophage; predicted DNA-binding transcriptional regulator	-5.30959	-3.97
b0278	DNA recombination and repair	yagL	CP4-6 prophage; DNA-binding protein	-4.72972	-5.08
b0281	DNA recombination and repair	intF	CP4-6 prophage; predicted phage integrase	-7.84969	-7.9
b0298	DNA recombination and repair	insE	IS3 transposase A	-1.33812	-1.1
b0299	DNA recombination and repair	insF	IS3 transposase B	-1.5874	-1.17
b0263	others and function unknown	afuB	putative transport system permease protein	-7.21645	-5.4
b0266	others and function unknown	yagB	CP4-6 prophage; hypothetical protein	-8.39243	-6.21
b0276	others and function unknown	yagJ	CP4-6 prophage; hypothetical protein	-5.60478	-5.6
b0277	others and function unknown	yagK	CP4-6 prophage; conserved protein	-5.15366	-5.79
b0279	others and function unknown	yagM	CP4-6 prophage; predicted protein	-6.75885	-7.46
b0280	others and function unknown	yagN	CP4-6 prophage; predicted protein	-8.51719	-8.68
b0283	others and function unknown	paoD	moco insertion factor for PaoABC aldehyde oxidoreductase	-7.43195	-8.17
b0289	others and function unknown	yagV	conserved protein	-6.06893	-5.62
b0290	others and function unknown	yagW	predicted receptor	-5.17344	-5.56
b0291	others and function unknown	yagX	predicted aromatic compound dioxygenase	-7.87267	-6.37
b0292	others and function unknown	matC	predicted protein	-4.77041	-5.02
b0293	others and function unknown	matB	cryptic Mat fimbrillin gene	-4.76953	-4.8
b0295	others and function unknown	ykgL	predicted protein	-5.45437	-5.28
b0300	others and function unknown	ykgA	predicted DNA-binding transcriptional regulator	-6.845	-6.69
b0303	others and function unknown	ykgI	predicted protein	-7.42284	-7.59
b0306	others and function unknown	ykgE	predicted oxidoreductase	-5.83214	-5.08
b0308	others and function unknown	ykgG	predicted transporter	-5.42393	-6.67
b0309	others and function unknown	b0309	hypothetical protein	-7.20577	-7.35
b0317	others and function unknown	yahC	predicted inner membrane protein	-5.07898	-7.67
b0319	others and function unknown	yahE	predicted protein	-4.27483	-4.87
b0320	others and function unknown	yahF	predicted acyl-CoA synthetase with NAD(P)-binding domain and succinyl-CoA synthetase domain	-5.71446	-5.1
b0321	others and function unknown	yahG	conserved protein	-4.24729	-3.45
b0324	others and function unknown	yahJ	predicted deaminase with metallo-dependent hydrolase domain	-5.72775	-4.96
b0326	others and function unknown	yahL	predicted protein	-5.08338	-6.44
b0327	others and function unknown	yahM	predicted protein	-5.43205	-5.24
b0354	others and function unknown	yaiL	predicted protein	-1.18288	-1.58
b0559	others and function unknown	ybcW	DLP12 prophage; predicted protein	-1.19298	-2.73
b1164	others and function unknown	ycgZ	connector protein for RcsB regulation of biofilm and acid-resistance	-1.35189	-1.99
b1165	others and function unknown	ymgA	connector protein for RcsB regulation of biofilm	-1.31068	-2.26
b1166	others and function unknown	ariR	connector protein for RcsB regulation of biofilm and acid-resistance	-1.16463	-2.97
b1426	others and function unknown	ydcH	predicted protein	-1.90772	-2.15
b2875	others and function unknown	yqeB	conserved protein with NAD(P)-binding Rossman fold	-1.95191	-1.63
b2876	others and function unknown	yqeC	conserved protein	-2.60222	-1.71
b3113	others and function unknown	tdcF	predicted L-PSP (mRNA) endoribonuclease	-5.26571	-2.58
b3595	others and function unknown	yibJ	hypothetical protein,predicted Rhs-family protein	-1.30508	-1.21
b4335	others and function unknown	yjiM	predicted 2-hydroxyglutaryl-CoA dehydratase	-1.62907	-2.15

## Sheet: 0 vs 10 vs 60-up
Blattner number	Gene name	Functional description	Log2 ratio(no shock)	Log2 ratio(shock 10min)	Log2 ratio(60min)
response to stress
b1304	pspA	regulatory protein for phage-shock-protein operon	1.82	1.68271	6.76
b1500	safA	Two component system connector membrane protein, EvgSA to PhoQP	1.46	1.91748	1.04
b2851	ygeG	predicted chaperone	1.55	1.50994	1.78
regulation
b1285	gmr	cyclic-di-GMP phosphodiesterase; csgD regulator; modulator of Rnase II stability	1.2	1.51472	1.03
b1499	ydeO	transcriptional activator for mdtEF	1.42	1.15307	1.16
b2369	evgA	DNA-binding response regulator in two-component regulatory system with EvgS	1.47	1.07845	1.05
b2855	ygeK	predicted DNA-binding transcriptional regulator	1.35	1.25615	2.01
b3507	dctR	predicted DNA-binding ranscriptional regulator	1.62	1.63078	1.64
b3512	gadE	DNA-binding transcriptional activator	2.57	2.90369	2.28
b3515	gadW	transcriptional activator of gadA and gadBC in absence of GadX	1.36	1.60538	1.18		a
b3516	gadX	DNA-binding transcriptional dual regulator	2.53	2.13355	1.4
b3743	asnC	DNA-binding transcriptional dual regulator	2.54	2.69669	4.64
b4017	arpA	ankyrin repeat protein	1.15	1.75075	1.7
transport and membrane
b0218	yafU	hypothetical protein,an inner membrane protein	1.13	1.19089	1.13
b0978	appC	cytochrome bd-II oxidase, subunit I	1.7	2.30677	2.4
b0979	appB	cytochrome bd-II oxidase, subunit II	1.62	2.32484	2.05
b1038	csgF	outer membrane protein involved in curlin assembly/transport	1.16	1.4532	1.55
b1039	csgE	curli production assembly/transport componen	1.28	1.29714	1.79
b1472	yddL	putative outer membrane porin protein	1.07	1.60042	1.49
b1660	ydhC	predicted transporter	1.46	2.14323	1.13
b2313	cvpA	membrane protein required for colicin V production	2.04	2.20082	2.07
b2704	srlB	glucitol/sorbitol-specific enzyme IIA component of PTS	1.93	2.134	1.15
b3006	exbB	membrane spanning protein in TonB-ExbB-ExbD complex	1.03	1.30011	1.2
b3506	slp	outer membrane lipoprotein	2.85	2.97572	1.16
b3508	yhiD	predicted Mg(2+) transport ATPase, inner membrane protein	1.05	1.30869	1.74
b3513	mdtE	multidrug resistance efflux transporter	1.07	1.617	2.03
b3654	xanP	xanthine permease	2.1	2.32623	3.64
b3909	kdgT	2-keto-3-deoxy-D-gluconate transporter	3.65	3.96644	2.79
metabolism
b0439	lon	DNA-binding ATP-dependent protease La	1.88	2.40562	3.91
b0523	purE	N5-carboxyaminoimidazole ribonucleotide mutase	2.37	2.47905	3.73
b0533	sfmH	predicted fimbrial-like adhesin protein	1.04	1.63743	1.26
b0674	asnB	asparagine synthetase B	1.59	2.05992	1.5
b1198	dhaM	fused predicted dihydroxyacetone-specific PTS enzymes: HPr component/EI component	1.03	1.35793	1.32
b1199	dhaL	dihydroxyacetone kinase, C-terminal domain	1.1	1.39146	1.46
b1352	kilR	Rac prophage; inhibitor of ftsZ, killing protein	1.22	1.19364	1.82
b1715	pheM	phenylalanyl-tRNA synthetase operon leader peptide	1.13	1.6927	1.95
b1800	dmlA	D-malate oxidase, NAD-dependent; probable tartrate dehydrogenase	1.98	1.50101	1.58
b1849	purT	phosphoribosylglycinamide formyltransferase 2	2.06	2.50258	3.49
b2269	elaD	protease, capable of cleaving an AMC-ubiquitin model substrate	1.01	1.31187	1.48
b2312	purF	amidophosphoribosyltransferase	1.55	1.86532	1.28
b2476	purC	phosphoribosylaminoimidazole-succinocarboxamide synthetase	1.82	2.31098	2.12
b2499	purM	phosphoribosylaminoimidazole synthetase	2.22	3.04657	4.13
b2500	purN	phosphoribosylglycinamide formyltransferase 1	1.19	1.79576	2.31
b2557	purL	phosphoribosylformyl-glycineamide synthetase	1.83	2.12309	3.1
b2654	ygaQ_1	hypothetical protein	1.93	1.57226	2.36
b2656	ygaQ_2	hypothetical protein	1.41	1.87359	2.13
b2657	ygaQ_3	putative enzyme	1.06	1.43419	1.73
b2705	srlD	sorbitol-6-phosphate dehydrogenase	1.95	1.98569	1.02
b2842	kduD	2-deoxy-D-gluconate 3-dehydrogenase	3.88	4.19511	4.49
b2843	kduI	4-deoxy-L-threo-5-hexosulose-uronate ketol-isomerase	4.14	4.86548	4.95
b2913	serA	D-3-phosphoglycerate dehydrogenase	1.26	1.46072	1.4
b3526	kdgK	ketodeoxygluconokinase	2.04	2.35702	2.49
b4005	purD	phosphoribosylglycinamide synthetase phosphoribosylamine-glycine ligase	2.55	2.50758	3.18
b4006	purH	fused IMP cyclohydrolase/phosphoribosylaminoimidazolecarboxamide formyltransferase	2	2.35564	3.55
b4014	aceB	malate synthase A	1.47	3.02711	2.32
b4015	aceA	isocitrate lyase	1.2	2.9912	2.42
b4245	pyrB	aspartate carbamoyltransferase, catalytic subunit	1.01	1.19201	1.82
b4246	pyrL	pyrBI operon leader peptide	1.39	1.41703	2.76
b4314	fimA	major type 1 subunit fimbrin (pilin)	1.47	1.0261	1.36
others and function unknown
b0370	ykiB	hypothetical protein	2.3	1.77734	1.92
b0980	appA	phosphoanhydride phosphorylase	1.06	1.56664	1.77
b1152	ymfP	hypothetical protein	4.48	2.54347	2.47
b1153	ymfQ	prohage e14 tail protein homolog	6.89	4.26713	4
b1154	stfP	e14 prophage; predicted protein	7.02	3.21966	3.98
b1347	ydaC	Rac prophage; predicted protein	1.26	1.44217	1.45
b1351	racC	Rac prophage; predicted protein	1.1	1.23046	2.23
b1455	yncH	conserved protein	1.68	1.91109	1.11
b1470	yddJ	predicted protein	1.44	1.59805	2
b1471	yddK	putative glycoportein	2.16	1.85852	2.22
b1576	ydfD	Qin prophage; predicted protein	1.13	1.44881	1.85
b1687	ydiJ	predicted FAD-linked oxidoreductase	1.05	1.91948	2.25
b1934	yedN_1	hypothetical protein	1.07	1.36381	1.11
b1935	yedM	hypothetical protein	2.04	2.57845	1.05
b2112	yehE	predicted protein	1.24	1.38995	1.12
b2598	pheL	pheA gene leader peptide	1.95	1.195	1.05
b2849	yqeK	predicted protein	1.15	1.34406	2.04
b2850	ygeF	hypothetical protein	1.52	1.983	2.26
b2854	pbl	hypothetical protein,predicted peptidoglycan-binding enzyme	1.62	1.82713	2.27
b2857	ygeM	hypothetical protein	1.67	2.05572	1.95
b2858	ygeN	hypothetical protein	1.22	1.8935	1.32
b3443	yrhA	hypothetical protein	1.31	1.51368	1.21
b4038	yjbI	hypothetical protein	1.03	1.17238	1.04
b4107	yjdN	conserved protein	1.21	1.744	1.06
b4252	tabA	biofilm modulator regulated by toxins	2.52	2.40772	2.32

## Sheet: 0 vs 10 vs 60-down
Blattner number	Gene name	Functional description	Log2 ratio(no shock)	Log2 ratio(shock 10min)	Log2 ratio(60min)
response to stress
b0311	betA	choline dehydrogenase, a flavoprotein	-5.66	-4.69993	-8.08
b0312	betB	betaine aldehyde dehydrogenase, NAD-dependent	-8.31	-8.36581	-10.42
b0314	betT	choline transporter of high affinity	-9.43	-7.14288	-12
regulation
b0272	yagI	CP4-6 prophage; predicted DNA-binding transcriptional regulator	-6.82	-6.80304	-6.1
b0282	yagP	predicted transcriptional regulator LYSR-type	-9.08	-5.28259	-6.9
b0294	matA	predicted regulator	-9.28	-8.36786	-6.68
b0305	ykgD	predicted DNA-binding transcriptional regulator	-7.26	-6.09914	-6.47
b0313	betI	DNA-binding transcriptional repressor	-7.28	-7.87686	-9.52
b0315	yahA	c-di-GMP-specific phosphodiesterase	-9.32	-6.20504	-10.06
b0316	yahB	predicted DNA-bindng transcriptional regulator	-8.55	-6.54761	-5.93
b0318	yahD	ankyrin repeat protein	-6.88	-5.0579	-4.92
b0330	prpR	propionate catabolism operon regulatory protein	-4.95	-4.0348	-5.57
b0338	cynR	transcriptional activator of cyn operon; autorepressor	-7.2	-6.83099	-5.73
b0852	rimK	ribosomal protein S6 modification protein	-1.53	-2.15226	-2.2
b1827	kdgR	DNA-binding transcriptional regulator f kdgK, kdgT, eda	-1.44	-2.11035	-2.85
b3118	tdcA	DNA-binding transcriptional activator	-2.76	-3.22175	-2.42
transport and membrane
b0260	mmuP	CP4-6 prophage; predicted S-methylmethionine transporter	-6.05	-4.66799	-5
b0262	afuC	CP4-6 prophage; predicted ferric transporter subunit	-6	-6.23699	-6.34
b0270	yagG	CP4-6 prophage; predicted sugar transporter	-8.8	-7.04985	-7.38
b0287	yagU	inner membrane protein, DUF1440 family	-9.15	-7.90676	-8.09
b0288	ykgJ	predicted ferredoxin	-5.7	-4.30647	-4.54
b0301	ykgB	inner membrane protein, DUF417 family	-8.15	-8.09715	-7.25
b0307	ykgF	predicted electron transport protein with ferridoxin-like domai	-7.69	-7.80814	-7.72
b0310	ykgH	predicted inner membrane protein	-7.57	-4.78478	-8.03
b0328	yahN	inner membrane protein, LysE transporter family; overproduction confers sensitivity to L-homoserine	-8.06	-9.1867	-7.4
b0336	codB	cytosine transporter	-8.34	-6.91084	-4.74
b0850	ybjC	conserved protein, DUF1418 family	-2.11	-2.89242	-1.76
b1243	oppA	oligopeptide transporter subunit	-2.56	-2.81843	-3.64
b1244	oppB	oligopeptide transporter subunit	-1.54	-1.55942	-2.38
b1245	oppC	oligopeptide transporter subunit	-1.23	-1.14137	-2.31
b1246	oppD	oligopeptide transporter subunit	-1.27	-1.02557	-2.13
b1247	oppF	oligopeptide transporter subunit	-1.25	-1.38349	-1.88
b2240	glpT	sn-glycerol-3-phosphate transporter	-1.26	-2.49141	-2.35
b2964	nupG	nucleoside transporter	-1.53	-1.93599	-1.62
b3116	tdcC	L-threonine/L-serine transporter	-4.49	-5.44371	-4.36
b3573	ysaA	predicted hydrogenase, 4Fe-4S ferredoxin-type component	-1.18	-1.89324	-1.06
b4032	malG	maltose transporter subunit	-1.19	-1.80637	-2.37
b4033	malF	maltose transporter subunit	-1.36	-2.26909	-2.24
b4034	malE	maltose transporter subunit	-1.25	-2.20683	-2.11
b4035	malK	fused maltose transport subunit, ATP-binding component of ABC superfamily/regulatory protein	-1.62	-2.56881	-2.41
b4036	lamB	maltose outer membrane porin (maltoporin)	-2.02	-3.23771	-2.6
b4037	malM	maltose regulon periplasmic protein	-1.81	-2.90687	-2
b4240	treB	fused trehalose(maltose)-specific PTS enzyme: IIB component/IIC component	-2.19	-2.74293	-3.95
metabolism
b0114	aceE	pyruvate dehydrogenase, decarboxylase component E1, thiamin-binding	-1.37	-1.20115	-1.27
b0261	mmuM	CP4-6 prophage; S-methylmethionine:homocysteine methyltransferase	-7.38	-7.14562	-7.12
b0268	yagE	CP4-6 prophage; predicted lyase/synthase	-8.84	-8.26422	-6.09
b0269	yagF	CP4-6 prophage; predicted dehydratase	-5.15	-5.86703	-4.66
b0271	yagH	CP4-6 prophage; predicted xylosidase/arabinosidase	-6.01	-5.80265	-5.59
b0273	argF	ornithine carbamoyltransferase 2, chain F; CP4-6 prophage	-7.34	-6.08305	-5.52
b0297	eaeH	ttaching and effacing protein homolog, pathogenesis factor	-7.02	-7.25681	-4.78
b0304	ykgC	predicted pyridine nucleotide-disulfide oxidoreductase	-6.31	-5.61625	-7.23
b0323	yahI	carbamate kinase-like protein	-5.76	-5.12145	-4.71
b0325	yahK	predicted oxidoreductase, Zn-dependent and NAD(P)-binding	-6.98	-6.84376	-10.05
b0331	prpB	2-methylisocitrate lyase	-4.2	-3.41853	-1.22
b0333	prpC	2-methylcitrate synthase	-3.84	-3.40435	-2.33
b0335	prpE	propionate--CoA ligase	-5.87	-3.74357	-3.55
b0337	codA	cytosine deaminase	-7.64	-9.64645	-9.33
b0339	cynT	carbonic anhydrase	-7.64	-5.46489	-3.89
b0350	mhpD	2-keto-4-pentenoate hydratase	-4.35	-2.709	-3.52
b0578	nfsB	dihydropteridine reductase, NAD(P)H-dependent, oxygen-insensitive	-1.37	-1.79159	-1.64
b0851	nfsA	nitroreductase A, NADPH-dependent, FMN-dependent	-1.95	-2.51958	-1.36
b3111	tdcG	L-serine deaminase III	-4.28	-5.11793	-2.04
b3112	b3112	putative L-serine dehydratase	-4.27	-5.45631	-2.37
b3114	tdcE	pyruvate formate-lyase 4/2-ketobutyrate formate-lyase	-4.53	-5.61566	-3.59
b3115	tdcD	propionate kinase/acetate kinase C, anaerobic	-4.25	-5.31364	-4.05
b3117	tdcB	catabolic threonine dehydratase, PLP-dependent	-4.27	-5.0911	-4.49
b3924	fpr	ferredoxin-NADP reductase	-1.12	-1.245	-1.87
b4239	treC	trehalose-6-P hydrolase	-2.37	-2.81427	-3.6
DNA recombination and repair
b0267	yagA	CP4-6 prophage; predicted DNA-binding transcriptional regulator	-6.83	-5.30959	-3.97
b0278	yagL	CP4-6 prophage; DNA-binding protein	-5.86	-4.72972	-5.08
b0281	intF	CP4-6 prophage; predicted phage integrase	-9.13	-7.84969	-7.9
b0299	insF	IS3 transposase B	-1.18	-1.5874	-1.17
others and function unknown
b0263	afuB	putative transport system permease protein	-6.4	-7.21645	-5.4
b0266	yagB	CP4-6 prophage; hypothetical protein	-7.67	-8.39243	-6.21
b0276	yagJ	CP4-6 prophage; hypothetical protein	-6.05	-5.60478	-5.6
b0277	yagK	CP4-6 prophage; conserved protein	-5.61	-5.15366	-5.79
b0279	yagM	CP4-6 prophage; predicted protein	-6.94	-6.75885	-7.46
b0280	yagN	CP4-6 prophage; predicted protein	-8.92	-8.51719	-8.68
b0283	paoD	moco insertion factor for PaoABC aldehyde oxidoreductase	-9.67	-7.43195	-8.17
b0289	yagV	conserved protein	-6.89	-6.06893	-5.62
b0290	yagW	predicted receptor	-7.6	-5.17344	-5.56
b0291	yagX	predicted aromatic compound dioxygenase	-7.77	-7.87267	-6.37
b0292	matC	predicted protein	-5.44	-4.77041	-5.02
b0293	matB	cryptic Mat fimbrillin gene	-7.35	-4.76953	-4.8
b0295	ykgL	predicted protein	-7.34	-5.45437	-5.28
b0300	ykgA	predicted DNA-binding transcriptional regulator	-8.7	-6.845	-6.69
b0303	ykgI	predicted protein	-9.48	-7.42284	-7.59
b0306	ykgE	predicted oxidoreductase	-5.16	-5.83214	-5.08
b0308	ykgG	predicted transporter	-6.04	-5.42393	-6.67
b0317	yahC	predicted inner membrane protein	-8.72	-5.07898	-7.67
b0319	yahE	predicted protein	-5.32	-4.27483	-4.87
b0320	yahF	predicted acyl-CoA synthetase with NAD(P)-binding domain and succinyl-CoA synthetase domain	-6.88	-5.71446	-5.1
b0321	yahG	conserved protein	-4.58	-4.24729	-3.45
b0324	yahJ	predicted deaminase with metallo-dependent hydrolase domain	-7.48	-5.72775	-4.96
b0326	yahL	predicted protein	-7.97	-5.08338	-6.44
b0327	yahM	predicted protein	-7.04	-5.43205	-5.24
b1164	ycgZ	connector protein for RcsB regulation of biofilm and acid-resistance	-1.59	-1.35189	-1.99
b1165	ymgA	connector protein for RcsB regulation of biofilm	-1.66	-1.31068	-2.26
b1166	ariR	connector protein for RcsB regulation of biofilm and acid-resistance	-1.5	-1.16463	-2.97
b2875	yqeB	conserved protein with NAD(P)-binding Rossman fold	-1.43	-1.95191	-1.63
b2876	yqeC	conserved protein	-1.76	-2.60222	-1.71
b3113	tdcF	predicted L-PSP (mRNA) endoribonuclease	-3.92	-5.26571	-2.58
b4335	yjiM	predicted 2-hydroxyglutaryl-CoA dehydratase	-1.44	-1.62907	-2.15
