# Supplementary material for: Global transcriptional analysis of Escherichia coli expressing IrrE, a regulator from Deinococcus radiodurans , in response to NaCl shock
Source: Royal Society of Chemistry journal article supplement (doi:10.1039/c5mb00080g), 2015-02-10
Supplement: c5mb00080g3.xlsx [file c5mb00080g3.xlsx]

## Sheet: Sheet1
RT-Primer	Sequence(F/R)
16S	GCACAAGCGGTGGAGCAT / CGCTGGCAACAAAAGATAAGG
appC	CCTCGCCACTCACTCATTAGAT / GGCTCACGATTGCCTTGC
appY	CTCCGTAGTTTTCATCTGTCAATCA / ACAATTCTTAGTTTAGAGGGGCAT
gldA	TACAACACCCTGCTGGAAGAA / CAAAACCAACACCGCTCAAA
glpA	GTCAGCCGTGGCATCGTG / GCGTCGGTAGCCCATTCA
glpD	GCGTAAAGGCGGCGAAGT / GAATGCCATAAGGCGAAGG
glpK	TTCGGTCTGACTCGTGGGG / GAGAATATCGGACTGGAACTGC
otsA	GTGGTGAAACAGGGAATGAGG / CCAGGCAGGACGCTGAAAT
otsB	GCAAAACCTTATCGCTTCCC / AGCCATCCCTTTCGCCTC
rpoS	CTTAGTAGAACAGGAACCCAGTGAT / ACCAAGGTAAAGCTGAGTCGC
treB	GTTGATTAGCGGCGGTTTG / TCGTAGATCGTTTGCAGGGA
treC	GGCAATCCTCGCCAGTAAA / CCAGGCCAATCCACGGT
iraD	GCACTGTTATTTCATGAGCCA/CAACCGCCATTATCCCAGAC
