# Supplementary material for: Global transcriptional analysis of Escherichia coli expressing IrrE, a regulator from Deinococcus radiodurans , in response to NaCl shock
Source: Royal Society of Chemistry journal article supplement (doi:10.1039/c5mb00080g), 2015-02-10
Supplement: c5mb00080g4.xlsx [file c5mb00080g4.xlsx]

## Sheet: rpoS 
Blattner no.	Gene name	Function	log2 ratio
			a	b	c
resonse to stress
b0812	dps	Fe-binding and storage protein	1.01	0.544417	0.0318224
b1004	wrbA	NAD(P)H:quinone oxidoreductase	1.76	1.2294	-0.304065
b1283	osmB	lipoprotein	2.34575	2.43187	-0.0749061
b1482	osmC	osmotically inducible peroxidase OsmC	1.83	1.78229	-0.000969838
b1732	katE	hydroperoxidase HPII(III) (catalase)	1.2	1.97116	0.200962
b1896	otsA	trehalose-6-phosphate synthase	1.74	2.48927	-0.0549267
b1897	otsB	trehalose-6-phosphate phosphatase, biosynthetic	2.5	3.16556	-0.0884347
b1967	hchA	Hsp31 molecular chaperone	1.87	1.82507	0.435667
b3153	yhbO	stress-resistance protein	0.61913	1.30736	0.153845
b3494	uspB	universal stress (ethanol tolerance) protein B	1.81	1.31878	0.142853
b4045	yjbJ	conserved protein, UPF0337 family	1.57	1.38532	0.070554
regulation
b0435	bolA	BolA DNA-binding transcriptional dual regulator	1.88	1.38051	-0.281631
b1217	chaB	cation transport regulator	1.26	1.55618	-0.0805384
b1285	gmr	cyclic di-GMP phosphodiesterase	1.2	1.51472	0.979963
b1341	ydaM	diguanylate cyclase, csgD regulator	0.656751	1.51365	0.547717
b3515	gadW	transcriptional activator of gadA and gadBC in absence of GadX	1.36	1.60538	1.14457
b3516	gadX	DNA-binding transcriptional dual regulator	2.53	2.13355	1.30477
b3555	yiaG	predicted transcriptional regulator, HTH_CROC1 family	1.64	2.28069	0.4067
transport and membrane
b0453	ybaY	outer membrane lipoprotein	1.59	1.19509	0.0206717
b0864	artP	arginine transporter subunit	0.774826	1.17184	0.449549
b1440	ydcS	polyhydroxybutyrate (PHB) synthase, ABC transporter periplasmic binding protein homolog	1.29	1.56516	-1.27459
b1469	narU	nitrate/nitrite transporter	1.2	1.84134	0.391803
b1492	gadC	predicted glutamate:gamma-aminobutyric acid antiporter	1.95	1.92078	-0.142992
b2666	yqaE	regulated by cyaR sRNA, UPF0057 family; predicted membrane protein	1.08	0.99288	0.212401
b3099	yqjE	inner membrane protein, DUF1469 family	1.73	1.33558	0.101895
b3291	mscL	mechanosensitive channel protein, high conductance	1.07	0.387802	-0.114927
b3522	yhjD	putative alternate lipid exporter, suppressor of msbA and KDO essentiality, inner membrane protein	1.36	1.63278	0.132644
b3524	yhjG	Inner membrane protein, AsmA family	0.671746	1.09024	-0.242407
b4149	blc	outer membrane lipoprotein (lipocalin), cell division and growth function	1.77	2.4669	-0.0539511
metabolism
b0186	ldcC	lysine decarboxylase 2, constitutive	1.12	1.54382	0.0791775
b0485	ybaS	glutaminase	2.45	3.18514	0.0934691
b0581	ybdK	weak gamma-glutamyl:cysteine ligase	0.625519	1.30298	0.289326
b0865	ybjP	lipoprotein	1.11	1.44674	0.115991
b0897	ycaC	predicted hydrolase, isochorismatase family	1.78	1.87837	0.150004
b1493	gadB	glutamate decarboxylase B, PLP-dependent	2.12	1.70907	-0.0531106
b1519	tam	trans-aconitate methyltransferase	0.689718	1.22246	1.1684
b1678	ynhG	murein L,D-transpeptidase	2.25	2.04432	0.0826462
b1927	amyA	cytoplasmic alpha-amylase	1.22	1.81062	0.129843
b2097	fbaB	fructose-bisphosphate aldolase class I	1.87	1.76814	0.159332
b2137	yohF	predicted oxidoreductase with NAD(P)-binding Rossmann-fold domain	1.11	1.36432	-0.563277
b2464	talA	transaldolase A	1.76763	2.33002	0.234082
b2465	tktB	transketolase 2, thiamin-binding	1.93	2.53798	0.185335
b2720	hycF	formate hydrogenlyase complex iron-sulfur protein	-0.471352	-0.505044	1.07927
b3012	dkgA	2,5-diketo-D-gluconate reductase A	1.19	1.77243	0.0991896
b3517	gadA	glutamate decarboxylase A, PLP-dependent	1.62	1.77206	0.227699
b4127	yjdJ	predicted acyltransferase with acyl-CoA N-acyltransferase domain	1.60781	1.88588	0.0608319
b4187	aidB	isovaleryl CoA dehydrogenase	1.31	1.574	-0.384316
others and function unknown
b0384	psiF	conserved protein, PsiF family, pho regulon	1.82	1.97357	0.475467
b0389	yaiA	predicted protein	0.948203	0.995684	-0.090266
b0707	ybgA	conserved protein, DUF1722 family	1.62	2.08558	0.449362
b0753	ybgS	conserved protein	0.667312	1.09372	0.0190052
b0871	poxB	pyruvate dehydrogenase (pyruvate oxidase), thiamin-dependent, FAD-binding	1.19	1.80532	-0.440105
b1000	cbpA	curved DNA-binding protein, DnaJ homologue that functions as a co-chaperone of DnaK	1.47	1.38187	-0.495773
b1003	yccJ	predicted protein	1.72	1.32309	-0.251891
b1051	msyB	multicopy suppressor of secY and secA	1.71	1.79551	0.0586436
b1188	ycgB	conserved protein	2.21	2.64124	-0.854972
b1258	yciF	predicted rubrerythrin/ferritin-like metal-binding protein	0.217131	1.09303	0.150055
b1614	ydgA	conserved protein, DUF945 family	1.38	1.26395	-0.0444587
b1783	yeaG	protein kinase, function unknown; autokinase	2.13	2.66493	-0.103375
b1953	yodD	predicted protein	2.62	2.58589	0.0614168
b1957	yodC	predicted protein	1.93	1.94656	0.0241562
b1990	erfK	L,D-transpeptidase linking Lpp to murein	1.55	1.80239	-0.383569
b2080	yegP	conserved protein, UPF0339 family	2.09	2.13083	0.252038
b2086	yegS	phosphatidylglycerol kinase, metal-dependent	0.523047	0.99502	1.30785
b2266	elaB	conserved protein	1.53	1.80671	-0.0465946
b2665	ygaU	predicted protein	1.84	1.64837	-0.181816
b2672	ygaM	predicted protein	2.7	2.38744	-0.14682
b3024	ygiW	conserved protein	1.11	0.703254	0.214716
b3097	yqjC	conserved protein	1.75	1.59026	-0.0559917
b3098	yqjD	conserved protein	1.44	1.25282	0.0449865
b3100	yqjK	conserved protein	1.66	1.58656	-0.0483976
b3102	yqjG	predicted S-transferase	1.2	1.24643	-0.0475731
b3336	bfr	bacterioferritin, iron storage and detoxification protein	1.44	1.4574	-0.352968
b3361	fic	stationary-phase protein, cell division	1.26	0.886524	-0.696256
b3362	yhfG	predicted protein	1.28	1.1604	-0.345951
b3448	yhhA	conserved protein, DUF2756 family	1.25	1.05917	0.524953
b4107	yjdN	conserved protein	1.21	1.744	1.01015
b4126	yjdI	conserved protein	1.98	1.99261	0.482867
b4247	yjgG	hypothetical protein	-0.260369	0.579475	1.1595
b4376	osmY	periplasmic protein	1.2	1.25172	0.0327119
a, MGE-ck / MGT-ck ; b, MGE – NaCl 10 min / MGT – NaCl 10 min; c, MGE – NaCl 60 min / MGT – NaCl 10 min;
